# Supplementary material for: Highly enantioselective direct vinylogous Michael addition of γ-substituted deconjugated butenolides to maleimides catalyzed by chiral squaramides
Source: Royal Society of Chemistry journal article supplement (doi:10.1039/c3ra43344g), 2013-01-01

Highly enantioselective direct vinylogous Michael addition of  
 $\gamma$ -substituted deconjugated butenolides to maleimides catalyzed by chiral  
squaramides

Yun-Long Guo,<sup>a,b</sup> Li-Na Jia,<sup>a,b</sup> Lin Peng,<sup>a</sup> Liang-Wen Qi,<sup>a,b</sup> Jing Zhou,<sup>a,b</sup> Fang Tian,<sup>a</sup>  
Xiao-Ying Xu,<sup>\*a</sup> Li-Xin Wang,<sup>\*a</sup>

<sup>a</sup> Key Laboratory of Asymmetric Synthesis & Chirotechnology of Sichuan Province,  
Chengdu

Institute of Organic Chemistry, Chinese Academy of Sciences, Chengdu 610041, PR  
China;

<sup>b</sup> University of Chinese Academy of Sciences, Beijing 100039, PR China  
wlxioc@cioc.ac.cn, xuxy@cioc.ac.cn

## Contents

|                                                                   |     |
|-------------------------------------------------------------------|-----|
| General Methods.....                                              | S2  |
| General procedure for the direct vinylogous Michael addition..... | S2  |
| Characterization of products.....                                 | S2  |
| Copies of HPLC spectra.....                                       | S16 |
| Copies of NMR spectra.....                                        | S36 |

## General Methods

Commercial grade solvent was dried and purified by standard procedures as specified in Purification of Laboratory Chemicals, 4th Ed (Armarego, W. L. F.; Perrin, D. D. Butterworth Heinemann: 1997). NMR spectras were recorded with tetramethylsilane as the internal standard.  $^1\text{H}$  NMR spectras were recorded at 300 MHz, and  $^{13}\text{C}$  NMR spectras were recorded at 75 MHz (Bruker Avance). Chemical shifts ( $\delta$ ) are reported in ppm downfield from  $\text{CDCl}_3$  ( $\delta = 7.26$  ppm) for  $^1\text{H}$  NMR and relative to the central  $\text{CDCl}_3$  resonance ( $\delta = 77.0$  ppm) for  $^{13}\text{C}$  NMR spectroscopy. Flash column chromatography was carried out using silica gel eluting with ethyl acetate and petroleum ether. High-resolution mass spectra were obtained with the microTOF-Q mass spectrometer. Reactions were monitored by TLC and visualized with ultraviolet light. Enantiomeric excess was determined by HPLC analysis on chiralpak AD-H and IC-H columns.

The catalysts **4a-f**<sup>1</sup> and  $\gamma$ -substituted deconjugated butenolides<sup>2</sup> were synthesized according to the literature.

## General procedure for the direct vinylogous Michael addition

Catalyst **4b** (1 mol %), maleimides **1** (0.22 mmol) and  $\gamma$ -substituted deconjugated butenolides **2** (0.2 mmol) were dissolved in 0.3 mL DCM at 30 °C and stirred for 5-96 h. The reaction was monitored by TLC analysis. The reaction mixture was directly subjected to flash column chromatography on silica gel (petroleum ether/ethyl acetate) to furnish the corresponding products **3**.

## Characterization of products

3-(5-oxo-2-phenyl-2,5-dihydrofuran-2-yl)-1-phenylpyrrolidine-2,5-dione (**3a**)

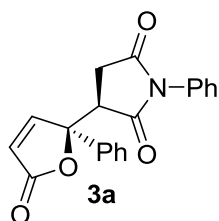

White solid,  $[\alpha]_D^{20} = +249.0$  (c 0.3,  $\text{CH}_2\text{Cl}_2$ ), yield 96 %; 82:18 dr, Enantiomeric excess: 97 %, determined by HPLC (Chiralcel AD-H column, hexane/*i*-propanol=70/30, flow rate 0.8 mL/min, 35 °C, UV detection at 220 nm),  $t_R$  (major) = 15.4 min,  $t_R$  (minor) = 18.7 min.  **$^1\text{H NMR}$**  (300 MHz,  $\text{CDCl}_3$ )  $\delta$  8.42 (d,  $J = 5.7$  Hz, 1H), 7.46-7.36 (m, 8H), 7.02-6.98 (m, 2H), 6.21 (d,  $J = 5.6$  Hz, 1H), 3.42 (dd,  $J = 4.7, 8.7$  Hz, 1H), 3.09-2.89 (m, 2H);  **$^{13}\text{C NMR}$**  (75 MHz,  $\text{CDCl}_3$ )  $\delta$  174.0, 173.8, 170.4, 158.1, 133.7, 131.1, 129.5, 129.2, 129.2, 129.0, 126.2, 125.8, 120.2, 89.1, 50.5, 30.9; **HRMS** (ESI) calcd. for  $\text{C}_{20}\text{H}_{15}\text{NNaO}_4$   $[\text{M}+\text{Na}]^+$ : 356.0893; found: 356.0892

1-(4-fluorophenyl)-3-(5-oxo-2-phenyl-2,5-dihydrofuran-2-yl)pyrrolidine-2,5-dione  
(**3b**)

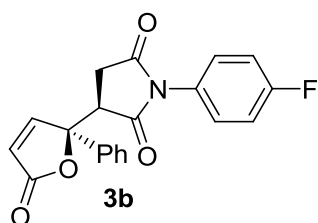

White solid,  $[\alpha]_D^{20} = +220.7$  (c 0.3,  $\text{CH}_2\text{Cl}_2$ ), yield 95 %; 74:26 dr, Enantiomeric excess: 96 %, determined by HPLC (Chiralcel AD-H column, hexane/*i*-propanol=70/30, flow rate 0.8 mL/min, 35 °C, UV detection at 220 nm),  $t_R$  (minor) = 14.7 min,  $t_R$  (major) = 17.6 min.  **$^1\text{H NMR}$**  (300 MHz,  $\text{CDCl}_3$ )  $\delta$  8.40 (d,  $J = 5.7$  Hz, 1H), 7.44-7.39 (m, 5H), 7.14-7.08 (m, 2H), 7.01-6.95 (m, 2H), 6.22 (d,  $J = 5.7$  Hz, 1H), 3.43 (dd,  $J = 4.7, 8.7$  Hz, 1H), 3.09-2.89 (m, 2H);  **$^{13}\text{C NMR}$**  (75 MHz,  $\text{CDCl}_3$ )  $\delta$  173.9, 173.7, 170.4, 163.9 ( $J = 247.8$  Hz), 157.9, 133.7, 129.5, 129.2, 128.1 ( $J = 8.7$

Hz), 126.9, 125.7, 120.3, 116.4 ( $J = 22.8$  Hz), 89.0, 50.3, 30.8; **HRMS** (EI) calcd. for  $C_{20}H_{14}NO_4F$   $[M]^+$ : 351.0907; found: 351.0913

1-(4-chlorophenyl)-3-(5-oxo-2-phenyl-2,5-dihydrofuran-2-yl)pyrrolidine-2,5-dione

**(3c)**

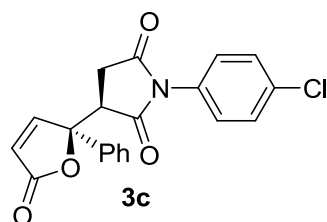

White solid,  $[\alpha]_D^{20} = +228.0$  (c 0.3,  $CH_2Cl_2$ ), yield 96 %; 78:22 dr, Enantiomeric excess: 96 %, determined by HPLC (Chiralcel AD-H column, hexane/*i*-propanol=70/30, flow rate 0.8 mL/min, 35 °C, UV detection at 220 nm),  $t_R$  (minor) = 16.9 min,  $t_R$  (major) = 21.0 min.  **$^1H$  NMR** (300 MHz,  $CDCl_3$ )  $\delta$  8.39 (d,  $J = 5.7$  Hz, 1H), 7.44-7.38 (m, 7H), 6.97 (d,  $J = 8.6$  Hz, 2H), 6.22 (d,  $J = 5.7$  Hz, 1H), 3.43 (dd,  $J = 4.7, 8.7$  Hz, 1H), 3.09-2.89 (m, 2H);  **$^{13}C$  NMR** (75 MHz,  $CDCl_3$ )  $\delta$  173.7, 173.4, 170.3, 157.9, 134.8, 133.6, 129.5, 129.4, 129.2, 127.4, 125.7, 124.4, 120.3, 88.9, 50.4, 30.8; **HRMS** (EI) calcd. for  $C_{20}H_{14}NO_4Cl$   $[M]^+$ : 367.0611; found: 367.0616

1-(4-nitrophenyl)-3-(5-oxo-2-phenyl-2,5-dihydrofuran-2-yl)pyrrolidine-2,5-dione

**(3d)**

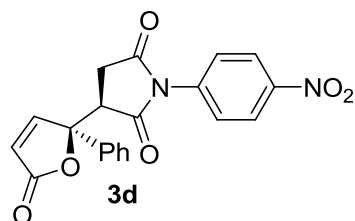

Light yellow solid,  $[\alpha]_D^{20} = +164.2$  (c 0.24,  $CH_2Cl_2$ ), yield 94 %; 81:19 dr, Enantiomeric excess: 95 %, determined by HPLC (Chiralcel AD-H column,

hexane/*i*-propanol= 70/30, flow rate 0.8 mL/min, 35 °C, UV detection at 220 nm),  $t_R$  (minor) = 24.6 min,  $t_R$  (major) = 33.9 min.  **$^1H$  NMR** (300 MHz,  $CDCl_3$ )  $\delta$  8.37 (d,  $J$  = 5.7 Hz, 1H), 8.29 (d,  $J$  = 8.0 Hz, 2H), 7.41 (m, 5H), 7.29 (d,  $J$  = 8.9 Hz, 2H), 6.25 (d,  $J$  = 5.6 Hz, 1H), 3.50 (dd,  $J$  = 4.6, 8.8 Hz, 1H), 3.15-2.94 (m, 2H);  **$^{13}C$  NMR** (75 MHz,  $CDCl_3$ )  $\delta$  173.2, 172.8, 170.2, 157.6, 147.1, 136.5, 133.6, 129.6, 129.3, 126.8, 125.6, 124.0, 120.6, 88.8, 50.3, 30.9; **HRMS** (EI) calcd. for  $C_{20}H_{14}N_2O_6$   $[M]^+$ : 378.0852; found: 378.0848

1-(4-methoxyphenyl)-3-(5-oxo-2-phenyl-2,5-dihydrofuran-2-yl)pyrrolidine-2,5-dione

(**3e**)

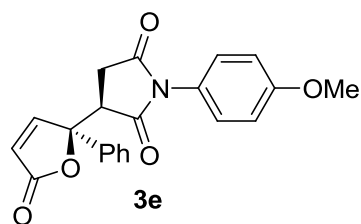

White solid,  $[\alpha]_D^{20}$  = +211.3 (c 0.3,  $CH_2Cl_2$ ), yield 96 %; 77:23 dr, Enantiomeric excess: 96 %, determined by HPLC (Chiralcel AD-H column, hexane/*i*-propanol= 70/30, flow rate 0.8 mL/min, 35 °C, UV detection at 220 nm),  $t_R$  (minor) = 19.3 min,  $t_R$  (major) = 20.2 min.  **$^1H$  NMR** (300 MHz,  $CDCl_3$ )  $\delta$  8.42 (d,  $J$  = 5.6 Hz, 1H), 7.42-7.39 (m, 5H), 6.95-6.88 (m, 4H), 6.21 (d,  $J$  = 5.6 Hz, 1H), 3.80 (s, 3H), 3.40 (dd,  $J$  = 4.7, 8.7 Hz, 1H), 3.06-2.87 (m, 2H);  **$^{13}C$  NMR** (75 MHz,  $CDCl_3$ )  $\delta$  174.3, 174.1, 170.4, 159.7, 158.1, 133.7, 129.4, 129.2, 127.4, 125.7, 123.6, 120.1, 114.5, 89.1, 55.4, 50.4, 30.8; **HRMS** (EI) calcd. for  $C_{21}H_{17}NO_5$   $[M]^+$ : 363.1107; found: 363.1115

1-(4-bromoxyphenyl)-3-(5-oxo-2-phenyl-2,5-dihydrofuran-2-yl)pyrrolidine-2,5-dione

(**3f**)

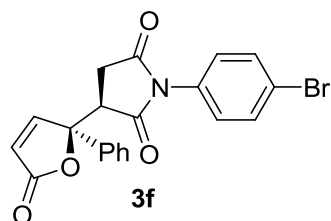

White solid,  $[\alpha]_D^{20} = +214.1$  (c 0.34,  $\text{CH}_2\text{Cl}_2$ ), yield 93 %; 77:23 dr, Enantiomeric excess: 96 %, determined by HPLC (Chiralcel AD-H column, hexane/*i*-propanol=70/30, flow rate 0.8 mL/min, 35 °C, UV detection at 220 nm),  $t_R$  (major) = 18.1 min,  $t_R$  (minor) = 20.9 min.  **$^1\text{H NMR}$**  (300 MHz,  $\text{CDCl}_3$ )  $\delta$  8.39 (d,  $J = 5.6$  Hz, 1H), 7.56 (d,  $J = 8.4$  Hz, 2H), 7.41 (s, 5H), 6.91 (d,  $J = 8.5$  Hz, 2H), 6.22 (d,  $J = 5.5$  Hz, 1H), 3.43 (dd,  $J = 4.7, 8.7$  Hz, 1H), 3.08-2.89 (m, 2H);  **$^{13}\text{C NMR}$**  (75 MHz,  $\text{CDCl}_3$ )  $\delta$  173.7, 173.4, 170.4, 157.9, 133.7, 132.4, 130.0, 129.5, 129.2, 127.7, 125.7, 122.9, 120.3, 89.0, 50.4, 30.8; **HRMS** (EI) calcd. for  $\text{C}_{20}\text{H}_{14}\text{NO}_4\text{Br}$   $[\text{M}]^+$ : 411.0106; found: 411.0106

3-(5-oxo-2-phenyl-2,5-dihydrofuran-2-yl)-1-*p*-tolylpyrrolidine-2,5-dione (**3g**)

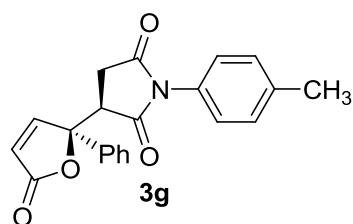

White solid,  $[\alpha]_D^{20} = +214.1$  (c 0.34,  $\text{CH}_2\text{Cl}_2$ ), yield 95 %; 81:19 dr, Enantiomeric excess: 97 %, determined by HPLC (Chiralcel AD-H column, hexane/*i*-propanol=70/30, flow rate 0.8 mL/min, 35 °C, UV detection at 220 nm),  $t_R$  (major) = 15.1 min,  $t_R$  (minor) = 17.5 min.  **$^1\text{H NMR}$**  (300 MHz,  $\text{CDCl}_3$ )  $\delta$  8.43 (d,  $J = 5.6$  Hz, 1H), 7.45-7.39 (m, 5H), 7.24 (d,  $J = 8.1$  Hz, 2H), 6.88-6.21 (d,  $J = 5.6$  Hz, 1H), 3.41 (dd,  $J = 4.7, 8.6$  Hz, 1H), 3.08-2.88 (m, 2H), 2.36 (s, 3H);  **$^{13}\text{C NMR}$**  (75 MHz,  $\text{CDCl}_3$ )  $\delta$

174.2, 173.9, 170.5, 158.2, 139.1, 133.7, 129.8, 129.5, 129.2, 128.4, 126.0, 125.8,  
120.2, 89.1, 50.5, 30.8, 21.1; **HRMS** (EI) calcd. for  $C_{21}H_{17}NO_4$   $[M]^+$ : 347.1158;  
found: 347.1158

1-(3-nitrophenyl)-3-(5-oxo-2-phenyl-2,5-dihydrofuran-2-yl)pyrrolidine-2,5-dione

**(3h)**

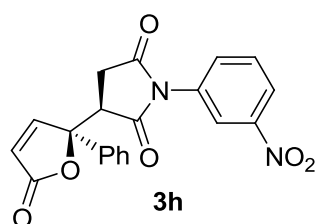

Light yellow solid, yield 93 %; 82:18 dr, Enantiomeric excess: 92 %, determined by  
HPLC (Chiralcel IC-H column, hexane/*i*-propanol=50/50, flow rate 0.7 mL/min, 35  
°C, UV detection at 220 nm),  $t_R$  (minor) = 32.3 min,  $t_R$  (minor) = 36.4 min.  **$^1H$  NMR**  
(300 MHz,  $CDCl_3$ )  $\delta$  8.38 (d,  $J$  = 5.6 Hz, 1H), 8.24 (d,  $J$  = 7.8 Hz, 1H), 7.93 (s, 1H),  
7.64-7.58 (m, 1H), 7.48-7.39 (m, 6H), 6.24 (d,  $J$  = 5.7 Hz, 1H), 3.51 (dd,  $J$  = 4.6, 8.9  
Hz, 1H), 3.14-3.00 (m, 2H);  **$^{13}C$  NMR** (75 MHz,  $CDCl_3$ )  $\delta$  173.4, 173.0, 170.3, 158.5,  
148.3, 132.2, 130.0, 129.7, 129.1, 125.7, 124.4, 123., 121.6, 120.6, 119.1, 88.8, 50.3,  
30.9; **HRMS** (EI) calcd. for  $C_{20}H_{14}N_2O_6$   $[M]^+$ : 378.0852; found: 378.0856

1-(3-fluorophenyl)-3-(5-oxo-2-phenyl-2,5-dihydrofuran-2-yl)pyrrolidine-2,5-dione

**(3i)**

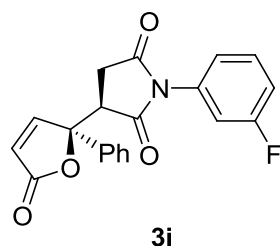

White solid,  $[\alpha]_D^{20}$  = +228.4 (c 0.33,  $CH_2Cl_2$ ), yield 95 %; 81:19 dr, Enantiomeric

excess: 96 %, determined by HPLC (Chiralcel IC-H column, hexane/*i*-propanol=70/30, flow rate 0.7 mL/min, 35 °C, UV detection at 220 nm),  $t_R$  (major) = 14.8 min,  $t_R$  (minor) = 23.4 min.  **$^1\text{H NMR}$**  (300 MHz,  $\text{CDCl}_3$ )  $\delta$  8.40 (d,  $J = 5.7$  Hz, 1H), 7.42-7.36 (m, 6H), 7.10-7.09 (m, 1H), 6.84-6.74 (m, 2H), 6.22 (d,  $J = 5.7$  Hz, 1H), 3.43 (dd,  $J = 4.7, 8.7$  Hz, 1H), 3.09-2.90 (m, 2H);  **$^{13}\text{C NMR}$**  (75 MHz,  $\text{CDCl}_3$ )  $\delta$  173.6, 173.5, 170.3, 164.1 ( $J = 246.6$ ), 157.9, 133.6, 132.3 ( $J = 9.9$  Hz), 130.4 ( $J = 8.7$  Hz), 129.6, 129.2, 125.7, 121.9 ( $J = 3.3$  Hz), 120.3, 116.2 ( $J = 20.8$  Hz), 114.0 ( $J = 24.1$  Hz), 88.9, 50.4, 30.8; **HRMS** (EI) calcd. for  $\text{C}_{20}\text{H}_{14}\text{NO}_4\text{F}$   $[\text{M}]^+$ : 351.0907; found: 351.0900

1-(3-bromophenyl)-3-(5-oxo-2-phenyl-2,5-dihydrofuran-2-yl)pyrrolidine-2,5-dione

(3j)

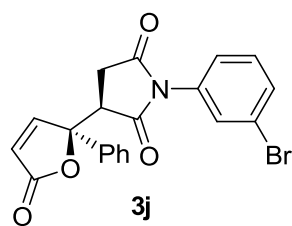

White solid,  $[\alpha]_D^{20} = +189.1$  (c 0.33,  $\text{CH}_2\text{Cl}_2$ ), yield 91 %; 78:22 dr, Enantiomeric excess: 94 %, determined by HPLC (Chiralcel AD-H column, hexane/*i*-propanol=50/50, flow rate 0.6 mL/min, 35 °C, UV detection at 220 nm),  $t_R$  (major) = 13.3 min,  $t_R$  (minor) = 20.4 min.  **$^1\text{H NMR}$**  (300 MHz,  $\text{CDCl}_3$ )  $\delta$  8.39 (d,  $J = 5.3$  Hz, 1H), 7.50 (d,  $J = 7.9$  Hz, 1H), 7.42 (m, 5H), 7.32-7.27 (m, 1H), 7.16 (s, 1H), 6.97 (d,  $J = 7.9$  Hz, 1H), 6.22 (d,  $J = 5.3$  Hz, 1H), 3.43 (dd,  $J = 4.7, 8.6$  Hz, 1H), 3.09-2.90 (m, 2H);  **$^{13}\text{C NMR}$**  (75 MHz,  $\text{CDCl}_3$ )  $\delta$  173.6, 173.3, 170.3, 157.9, 133.6, 132.2, 132.0, 130.3, 129.6, 129.3, 129.2, 125.7, 124.9, 122.4, 120.3, 88.9, 50.4, 30.8; **HRMS** (EI) calcd.



for  $C_{20}H_{14}NO_4Br$   $[M]^+$ : 411.0106; found: 411.0126

3-(5-oxo-2-phenyl-2,5-dihydrofuran-2-yl)-1-*m*-tolylpyrrolidine-2,5-dione (**3k**)

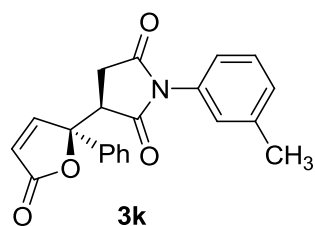

White solid,  $[\alpha]_D^{20} = +220.3$  (c 0.3,  $CH_2Cl_2$ ), yield 93 %; 80:20 dr, Enantiomeric excess: 97 %, determined by HPLC (Chiralcel IC-H column, hexane/*i*-propanol= 50/50, flow rate 0.7 mL/min, 35 °C, UV detection at 220 nm),  $t_R$  (major) = 22.9 min,  $t_R$  (minor) = 37.4 min.  **$^1H$  NMR** (300 MHz,  $CDCl_3$ )  $\delta$  8.42 (d,  $J = 5.3$  Hz, 1H), 7.42 (s, 5H), 7.34-7.29 (m, 1H), 7.21-7.19 (m, 1H), 6.79 (s, 2H), 6.21 (dd,  $J = 4.3, 7.6$  Hz, 1H), 3.08-2.88 (m, 2H), 2.35 (s, 3H);  **$^{13}C$  NMR** (75 MHz,  $CDCl_3$ )  $\delta$  174.1, 173.9, 170.5, 158.1, 139.3, 133.7, 130.9, 129.8, 128.4, 129.2, 129.0, 126.8, 125.8, 123.3, 120.1, 8.1, 50.4, 30.8, 21.1; **HRMS** (EI) calcd. for  $C_{21}H_{17}NO_4$   $[M]^+$ : 347.1158; found: 347.1162

1-(2-fluorophenyl)-3-(5-oxo-2-phenyl-2,5-dihydrofuran-2-yl)pyrrolidine-2,5-dione

(**3l**)

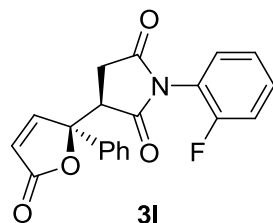

White solid,  $[\alpha]_D^{20} = +173.0$  (c 0.3,  $CH_2Cl_2$ ), yield 88 %; 79:21 dr, Enantiomeric excess: 95 %, determined by HPLC (Chiralcel IC-H column, hexane/*i*-propanol= 50/50, flow rate 0.7 mL/min, 35 °C, UV detection at 220 nm),  $t_R$  (major) = 22.1 min,

$t_R$  (minor) = 36.5 min.  $^1\text{H NMR}$  (300 MHz,  $\text{CDCl}_3$ )  $\delta$  8.41 (s, 1H), 7.44-7.41 (m, 6H), 7.22-7.16 (m, 3H), 6.21 (d,  $J = 5.3$  Hz, 1H), 3.46 (s, 1H), 3.15-2.91 (m, 2H);  $^{13}\text{C NMR}$  (75 MHz,  $\text{CDCl}_3$ )  $\delta$  173.2, 173.0, 170.4, 158.8 ( $J = 251.7$  Hz), 158.3, 157.9, 133.7, 131.3 ( $J = 7.8$  Hz), 129.5, 128.7, 125.7, 124.6 ( $J = 3.7$  Hz), 120.3 ( $J = 13.6$  Hz), 119.0 ( $J = 13.2$  Hz), 116.8 ( $J = 19.2$  Hz), 89.0, 50.8 ( $J = 24.5$  Hz), 31.0; **HRMS** (EI) calcd. for  $\text{C}_{20}\text{H}_{14}\text{NO}_4\text{F}$   $[\text{M}]^+$ : 351.0907; found: 351.0927

1-methyl-3-(5-oxo-2-phenyl-2,5-dihydrofuran-2-yl)pyrrolidine-2,5-dione (**3m**)

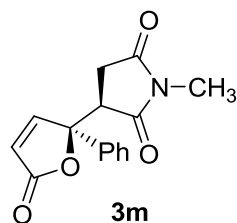

White solid,  $[\alpha]_D^{20} = +233.8$  (c 0.2,  $\text{CH}_2\text{Cl}_2$ ), yield 82 %; 44:56 dr, Enantiomeric excess: 95 %, determined by HPLC (Chiralcel AD-H column, hexane/*i*-propanol=70/30, flow rate 0.8 mL/min, 35 °C, UV detection at 220 nm),  $t_R$  (major) = 9.4 min,  $t_R$  (minor) = 10.1 min.  $^1\text{H NMR}$  (300 MHz,  $\text{CDCl}_3$ )  $\delta$  8.39 (d,  $J = 5.6$  Hz, 1H), 7.35 (s, 5H), 6.19 (d,  $J = 5.6$  Hz, 1H), 3.27 (dd,  $J = 4.5, 8.7$  Hz, 1H), 2.91 (dd,  $J = 8.9, 18.6$  Hz, 1H), 2.85 (s, 3H), 2.75 (dd,  $J = 4.6, 18.6$  Hz, 1H);  $^{13}\text{C NMR}$  (75 MHz,  $\text{CDCl}_3$ )  $\delta$  175.0, 174.8, 170.5, 158.2, 133.8, 129.3, 129.1, 125.5, 120.1, 89.1, 50.4, 30.6, 24.9; **HRMS** (EI) calcd. for  $\text{C}_{15}\text{H}_{13}\text{NO}_4$   $[\text{M}]^+$ : 271.0845; found: 271.0847

3-(2-(4-fluorophenyl)-5-oxo-2,5-dihydrofuran-2-yl)-1-phenylpyrrolidine-2,5-dione (**3n**)

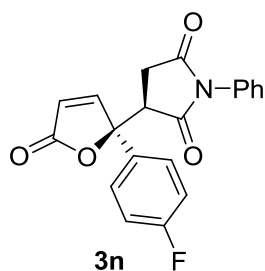

White solid, yield 80 %; 75:25 dr, Enantiomeric excess: 95 %, determined by HPLC (Chiralcel IC-H column, hexane/*i*-propanol= 50/50, flow rate 0.7 mL/min, 35 °C, UV detection at 220 nm),  $t_R$  (major) = 18.8 min,  $t_R$  (minor) = 34.7 min.  **$^1\text{H NMR}$**  (300 MHz, d-DMSO)  $\delta$  8.46 (d,  $J$  = 5.5 Hz, 1H), 7.70-7.40 (m, 5H), 7.32-7.27 (m, 2H), 7.12 (d,  $J$  = 7.3 Hz, 2H), 6.48 (d,  $J$  = 5.5 Hz, 1H), 3.94 (d,  $J$  = 5.0 Hz, 1H), 3.01-2.87 (m, 1H), 2.61-2.55 (m, 1H);  **$^{13}\text{C NMR}$**  (75 MHz,  $\text{CDCl}_3$ )  $\delta$  174.2, 173.8, 170.8, 163.7 ( $J$  = 244.1 Hz), 157.6, 132.6, 131.9 ( $J$  = 3.0 Hz), 129.0, 128.5, 128.2 ( $J$  = 8.5 Hz), 126.8, 121.3, 115.8 ( $J$  = 21.5 Hz), 89.2, 47.5, 30.8; **HRMS** (EI) calcd. for  $\text{C}_{20}\text{H}_{14}\text{NO}_4\text{F}$   $[\text{M}]^+$ : 351.0907; found: 351.0911

3-(2-(4-chlorophenyl)-5-oxo-2,5-dihydrofuran-2-yl)-1-phenylpyrrolidine-2,5-dione

**(3o)**

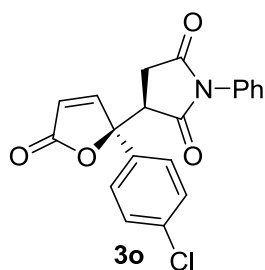

White solid, yield 86 %; 77:23 dr, Enantiomeric excess: 94 %, determined by HPLC (Chiralcel IC-H column, hexane/*i*-propanol= 50/50, flow rate 0.7 mL/min, 35 °C, UV detection at 220 nm),  $t_R$  (major) = 20.3 min,  $t_R$  (minor) = 39.4 min.  **$^1\text{H NMR}$**  (300 MHz, d-DMSO)  $\delta$  8.35 (d,  $J$  = 5.4 Hz, 1H), 7.56-7.44 (m, 7H), 7.17-7.11 (m, 2H),

6.33 (d,  $J = 5.4$  Hz, 1H), 3.88 (dd,  $J = 3.6, 8.7$  Hz, 1H), 3.05-2.96 (m, 1H), 2.54 (s, 1H);  $^{13}\text{C}$  NMR (75 MHz,  $\text{CDCl}_3$ )  $\delta$  173.6, 173.3, 170.1, 157.3, 134.3, 133.8, 131.4, 128.8, 128.6, 128.1, 127.1, 126.3, 120.5, 88.6, 47.7, 30.4; **HRMS** (EI) calcd. for  $\text{C}_{20}\text{H}_{14}\text{NO}_4\text{Cl}$   $[\text{M}]^+$ : 367.0611; found: 367.0633

3-(2-(4-bromophenyl)-5-oxo-2,5-dihydrofuran-2-yl)-1-phenylpyrrolidine-2,5-dione

(**3p**)

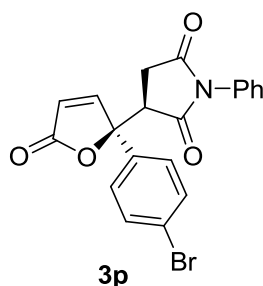

White solid, yield 83 %; 78:22 dr, Enantiomeric excess: 95 %, determined by HPLC (Chiralcel IC-H column, hexane/*i*-propanol= 50/50, flow rate 0.7 mL/min, 35 °C, UV detection at 220 nm),  $t_{\text{R}}$  (major) = 22.0 min,  $t_{\text{R}}$  (minor) = 43.3 min.  $^1\text{H}$  NMR (300 MHz,  $d\text{-DMSO}$ )  $\delta$  8.41 (d,  $J = 5.3$  Hz, 1H), 7.67 (d,  $J = 8.0$  Hz, 2H), 7.50-7.40 (m, 5H), 7.14 (d,  $J = 7.2$  Hz, 2H), 6.49 (d,  $J = 5.5$  Hz, 1H), 3.98 (dd,  $J = 3.8, 9.0$  Hz, 1H), 3.02-2.88 (m, 1H), 2.58-2.54 (m, 1H);  $^{13}\text{C}$  NMR (75 MHz,  $\text{CDCl}_3$ )  $\delta$  174.2, 173.7, 170.9, 157.6, 135.8, 131.7, 129.0, 128.5, 128.0, 127.4, 126.8, 122.1, 121.3, 89.2, 47.1, 30.8; **HRMS** (EI) calcd. for  $\text{C}_{20}\text{H}_{14}\text{NO}_4\text{Br}$   $[\text{M}]^+$ : 411.0106; found: 411.0110

3-(5-oxo-2-*p*-tolyl-2,5-dihydrofuran-2-yl)-1-phenylpyrrolidine-2,5-dione (**3q**)

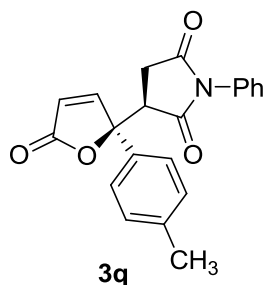

White solid, yield 87 %; 79:21 dr, Enantiomeric excess: 97 %, determined by HPLC (Chiralcel IC-H column, hexane/*i*-propanol= 50/50, flow rate 0.7 mL/min, 35 °C, UV detection at 220 nm),  $t_R$  (major) = 24.3 min,  $t_R$  (minor) = 46.3 min.  $^1\text{H NMR}$  (300 MHz,  $\text{CDCl}_3$ )  $\delta$  8.41 (d,  $J$  = 5.7 Hz, 1H), 7.48-7.39 (m, 3H), 7.34-7.31 (m, 2H), 7.22-7.04 (m, 2H), 7.03 (d,  $J$  = 6.7 Hz, 2H), 6.19 (d,  $J$  = 5.7 Hz, 1H), 3.40 (dd,  $J$  = 4.9, 8.6 Hz, 1H), 3.09-2.90 (m, 2H), 2.35 (s, 3H);  $^{13}\text{C NMR}$  (75 MHz,  $\text{CDCl}_3$ )  $\delta$  174.1, 173.9, 170.6, 158.3, 139.6, 131.2, 130.7, 129.9, 129.2, 129.0, 126.2, 125.6, 120.0, 89.2, 50.5, 30.9, 21.0; **HRMS** (ESI) calcd. for  $\text{C}_{21}\text{H}_{17}\text{NNa}_4$  [ $\text{M}+\text{Na}$ ]: 370.1050; found: 370.1036

3-(2-(2,5-dimethylphenyl)-5-oxo-2,5-dihydrofuran-2-yl)-1-phenylpyrrolidine-2,5-dione (**3r**)

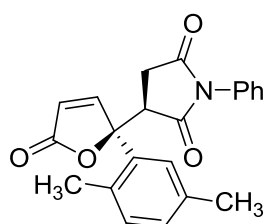

**3r**

White solid, yield 96 %; 77:23 dr, Enantiomeric excess: 97 %, determined by HPLC (Chiralcel IC-H column, hexane/*i*-propanol= 50/50, flow rate 0.7 mL/min, 35 °C, UV detection at 220 nm),  $t_R$  (major) = 21.0 min,  $t_R$  (minor) = 28.2 min.  $^1\text{H NMR}$  (300 MHz,  $\text{CDCl}_3$ )  $\delta$  8.25 (d,  $J$  = 5.7 Hz, 1H), 7.47-7.36 (m, 3H), 7.14-7.06 (m, 5H), 6.28 (d,  $J$  = 5.6 Hz, 1H), 3.63 (dd,  $J$  = 4.5, 9.0 Hz, 1H), 3.05 (dd,  $J$  = 9.2, 18.6 Hz, 1H), 2.79 (dd,  $J$  = 4.5, 18.6 Hz, 1H), 2.56 (s, 3H); 2.27 (s, 3H);  $^{13}\text{C NMR}$  (75 MHz,  $\text{CDCl}_3$ )  $\delta$  173.7, 173.6, 170.5, 157.1, 136.0, 133.8, 132.4, 131.3, 12.9, 129.1, 128.9, 127.4, 127.0, 126.3, 121.3, 91.2, 4.2, 31.1, 22.3, 20.9; **HRMS** (EI) calcd. for  $\text{C}_{22}\text{H}_{19}\text{NNaO}_4$

[M+Na]: 384.1206; found: 384.1195

3-(2-(naphthalene-2-yl)-5-oxo-2,5-dihydrofuran-2-yl)-1-phenylpyrrolidine-2,5-dione

(3s)

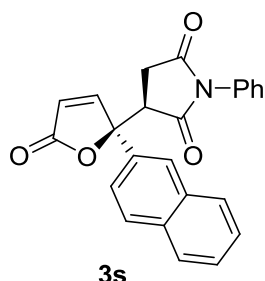

White solid, yield 95 %; 78:22 dr, Enantiomeric excess: 97 %, determined by HPLC (Chiralcel IC-H column, hexane/*i*-propanol= 50/50, flow rate 0.7 mL/min, 35 °C, UV detection at 220 nm),  $t_R$  (major) = 25.4 min,  $t_R$  (minor) = 46.4 min.  $^1\text{H NMR}$  (300 MHz,  $\text{CDCl}_3$ )  $\delta$  8.54 (d,  $J$  = 5.7 Hz, 1H), 7.97-7.84 (m, 4H), 7.57-7.54 (m, 6H), 6.98-6.95 (m, 2H), 6.25 (d,  $J$  = 5.7 Hz, 1H), 3.51 (dd,  $J$  = 5.0, 8.4 Hz, 1H), 3.13-2.90 (m, 2H);  $^{13}\text{C NMR}$  (75 MHz,  $\text{CDCl}_3$ )  $\delta$  174.2, 173.6, 170.5, 158.2, 133.2, 133.0, 131.1, 129.7, 129.2, 129.2, 128.9, 128.3, 127.6, 127.3, 127.2, 126.9, 125.6, 122.4, 120.2, 89.4, 50.6, 31.0; **HRMS** (ESI) calcd. for  $\text{C}_{24}\text{H}_{17}\text{NNaO}_4$  [M+Na] 406.1050; found: 406.1049

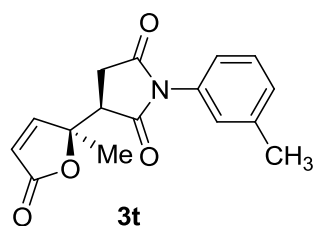

Colorless oil, yield 92 %; 68:32 dr, Enantiomeric excess: 83 %, determined by HPLC (Chiralcel IC-H column, hexane/ethanol= 90/10, flow rate 1.5 mL/min, 35 °C, UV detection at 210 nm),  $t_R$  (major) = 33.2 min,  $t_R$  (minor) = 47.9 min.  $^1\text{H NMR}$  (300 MHz,  $\text{CDCl}_3$ )  $\delta$  7.85-7.83 (m, 1H), 7.40-7.31 (m, 1H), 7.24-7.19 (m, 1H), 7.05-6.97

(m, 2H), 6.17-6.12 (m, 1H), 3.19 (dd,  $J = 4.8, 9.1$  Hz, 1H), 3.04 (dd,  $J = 9.1, 18.8$  Hz, 1H), 2.88 (dd,  $J = 4.7, 18.4$  Hz, 1H), 2.39 (s, 3H), 1.58 (s, 3H);  $^{13}\text{C}$  NMR (75 MHz,  $\text{CDCl}_3$ )  $\delta$  174.1, 173.6, 171.0, 159.4, 139.3, 131.1, 129.8, 129.0, 126.9, 123.4, 120.9, 86.8, 46.9, 30.9, 21.2, 19.2; **HRMS** (ESI) calcd. for  $\text{C}_{16}\text{H}_{15}\text{NNaO}_4$  [M+Na] 308.0893; found: 308.0902

1 W. Yang and D.-M. Du, *Org. Lett.*, 2010, **12**, 5450.

2 A. Tsolomitis and C. Sandris, *J. Heterocyclic. Chem.*, 1983, **20**, 1545.

Copies of HPLC spectra

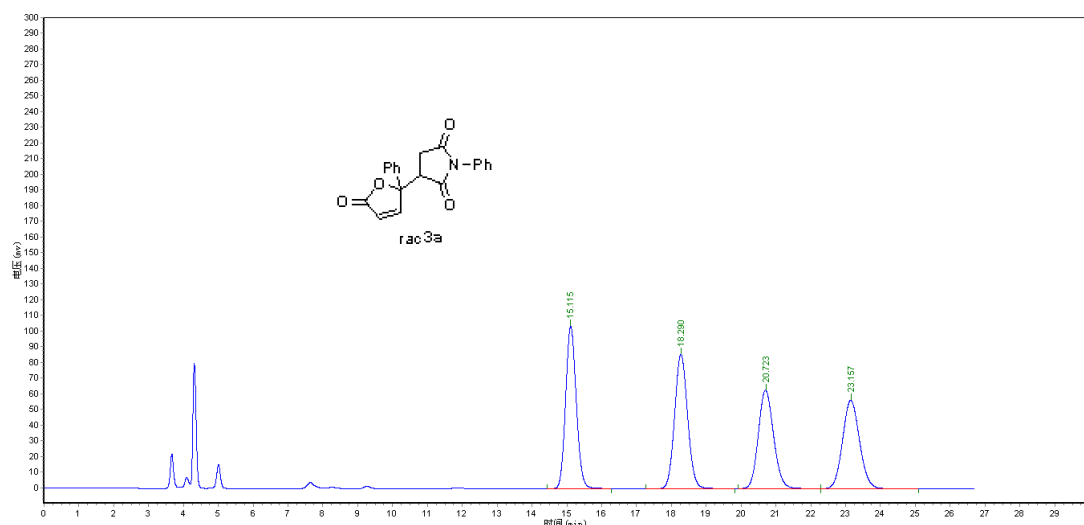

| Peak | RT(min.) | Height(mV*sec) | Area(mV)    | Area(%) |
|------|----------|----------------|-------------|---------|
| 1    | 15.115   | 103582.391     | 2200679.000 | 26.7076 |
| 2    | 18.290   | 85715.898      | 2215552.000 | 26.8881 |
| 3    | 20.723   | 62848.605      | 1913800.750 | 23.2260 |
| 4    | 23.157   | 56362.906      | 1909866.375 | 23.1783 |

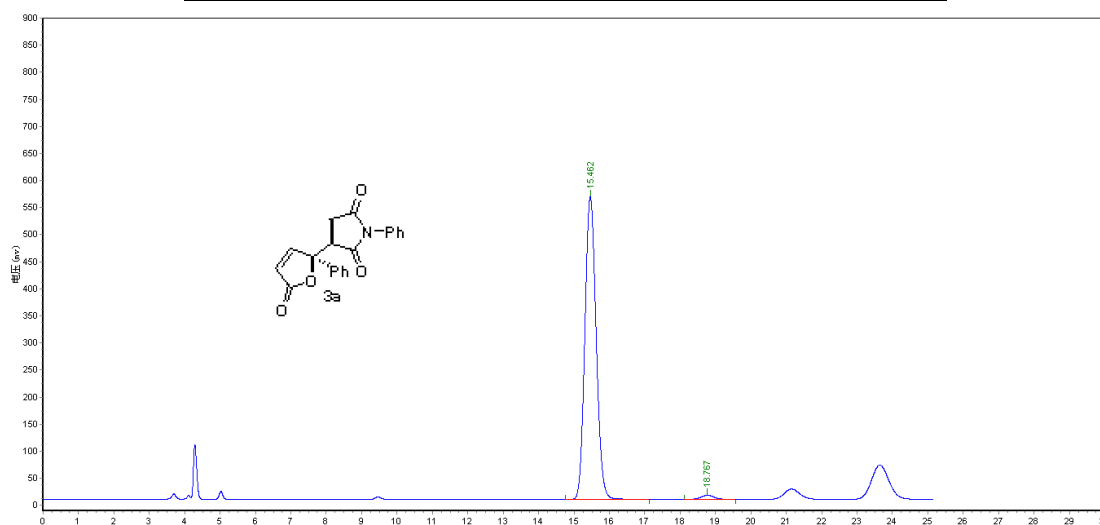

| Peak | RT(min.) | Height(mV*sec) | Area(mV)     | Area(%) |
|------|----------|----------------|--------------|---------|
| 1    | 15.462   | 558764.438     | 12329913.000 | 98.4644 |
| 2    | 18.767   | 7435.787       | 192290.047   | 1.5356  |



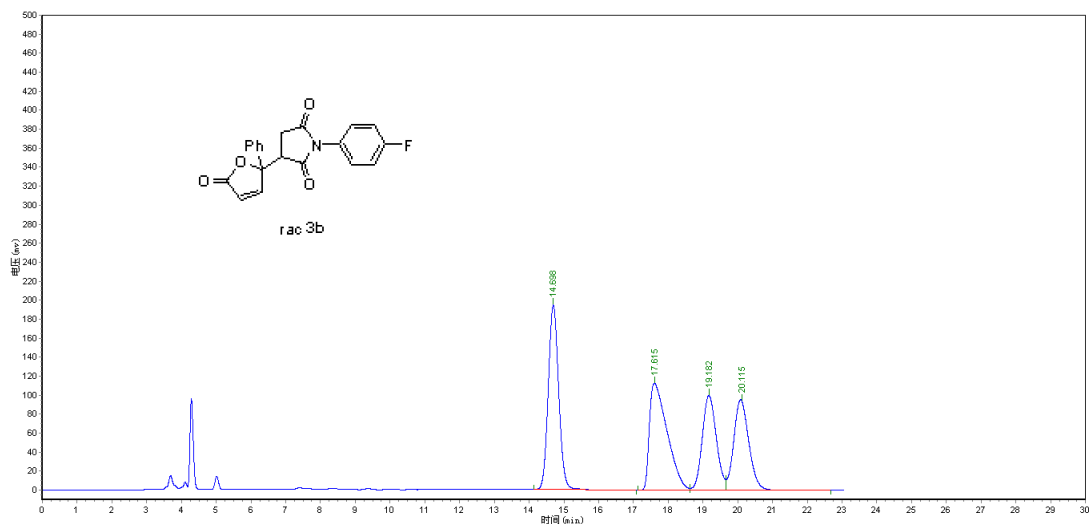

| Peak | RT(min.) | Height(mV*sec) | Area(mV)    | Area(%) |
|------|----------|----------------|-------------|---------|
| 1    | 14.698   | 193956.219     | 4026605.750 | 29.3664 |
| 2    | 17.615   | 112718.273     | 3992043.000 | 29.1143 |
| 3    | 19.182   | 99828.594      | 2815600.750 | 20.5344 |
| 4    | 20.115   | 95126.703      | 2877378.000 | 20.9849 |

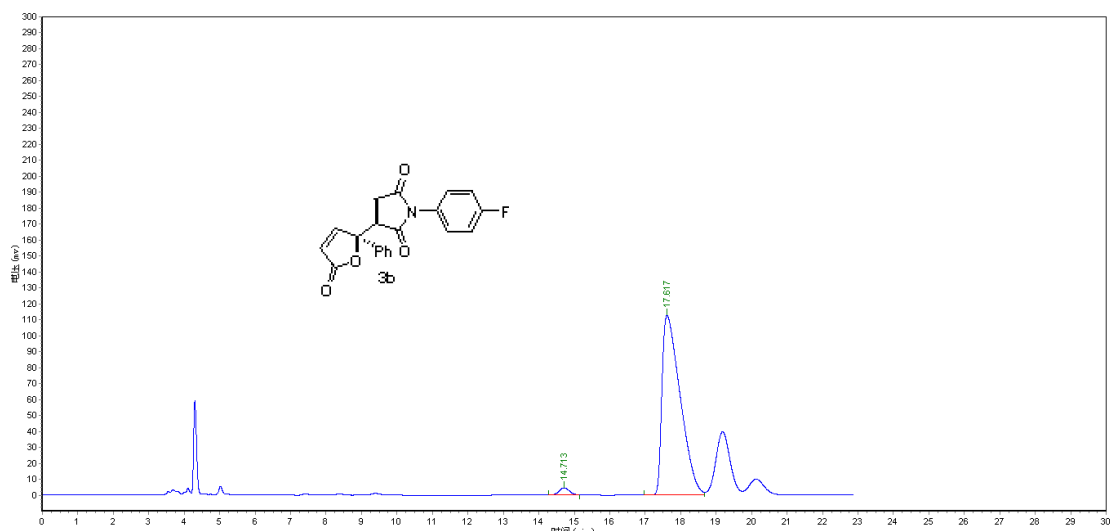

| Peak | RT(min.) | Height(mV*sec) | Area(mV)    | Area(%) |
|------|----------|----------------|-------------|---------|
| 1    | 14.713   | 4534.848       | 92223.875   | 2.2442  |
| 2    | 17.617   | 112749.070     | 4017175.750 | 97.7558 |

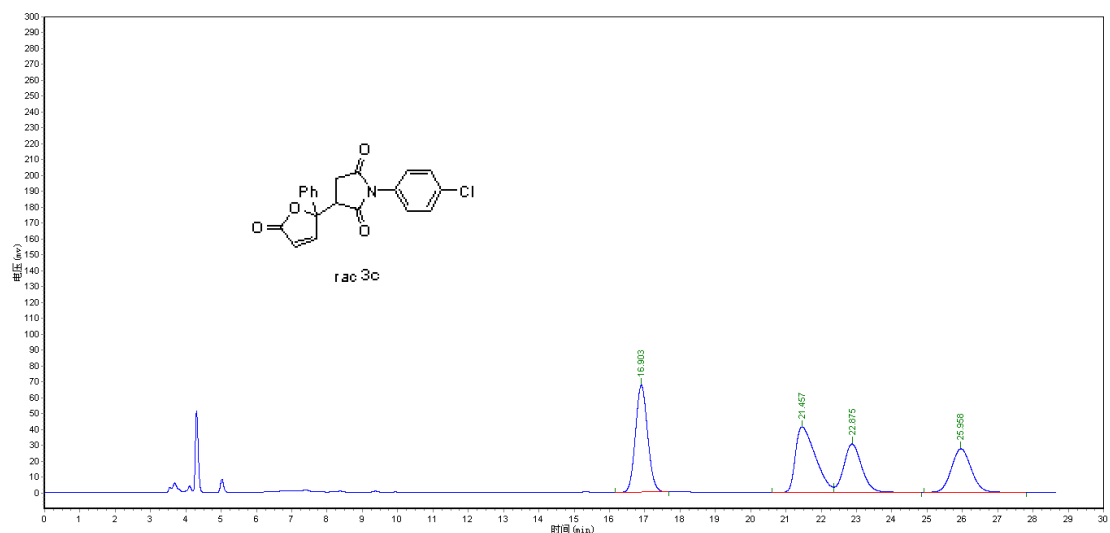

| Peak | RT(min.) | Height(mV*sec) | Area(mV)    | Area(%) |
|------|----------|----------------|-------------|---------|
| 1    | 16.903   | 67446.188      | 1614178.000 | 30.1617 |
| 2    | 21.457   | 41208.969      | 1608164.375 | 30.0493 |
| 3    | 22.875   | 30470.871      | 1072916.125 | 20.0479 |
| 4    | 25.958   | 27383.795      | 1056493.375 | 19.7411 |

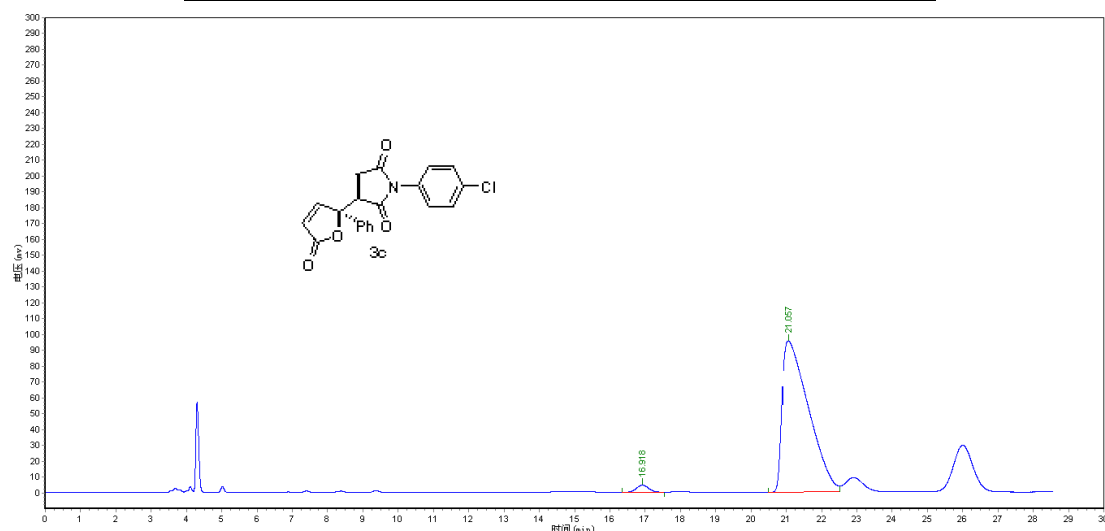

| Peak | RT(min.) | Height(mV*sec) | Area(mV)    | Area(%) |
|------|----------|----------------|-------------|---------|
| 1    | 16.918   | 4491.180       | 107761.297  | 2.1234  |
| 2    | 21.057   | 95475.711      | 4967074.000 | 97.8765 |

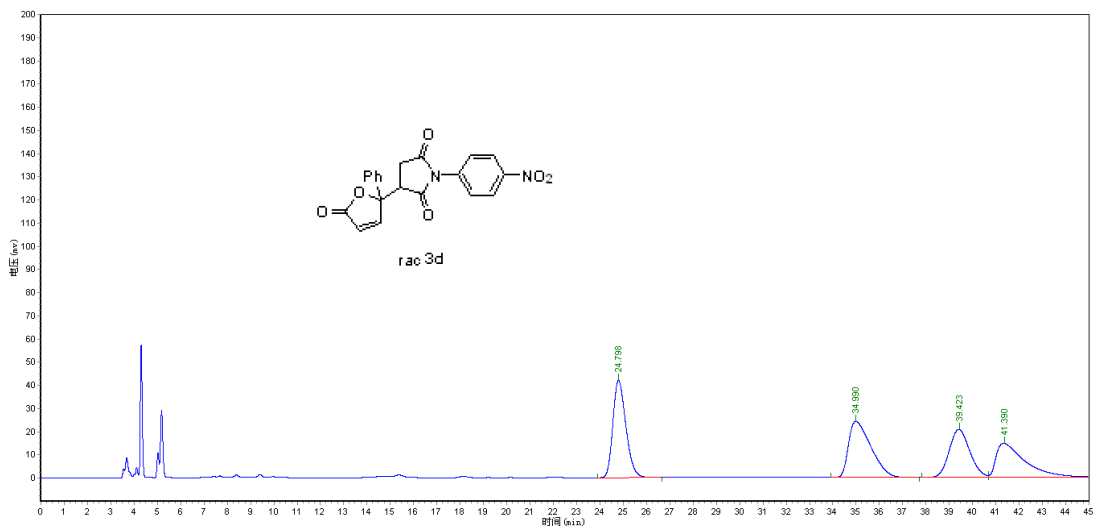

| Peak | RT(min.) | Height(mV*sec) | Area(mV)    | Area(%) |
|------|----------|----------------|-------------|---------|
| 1    | 24.798   | 41886.059      | 1627868.250 | 28.0170 |
| 2    | 34.990   | 24176.246      | 1617652.375 | 27.8411 |
| 3    | 39.423   | 20623.900      | 1271841.375 | 21.8895 |
| 4    | 41.390   | 14689.401      | 1292931.500 | 22.2524 |

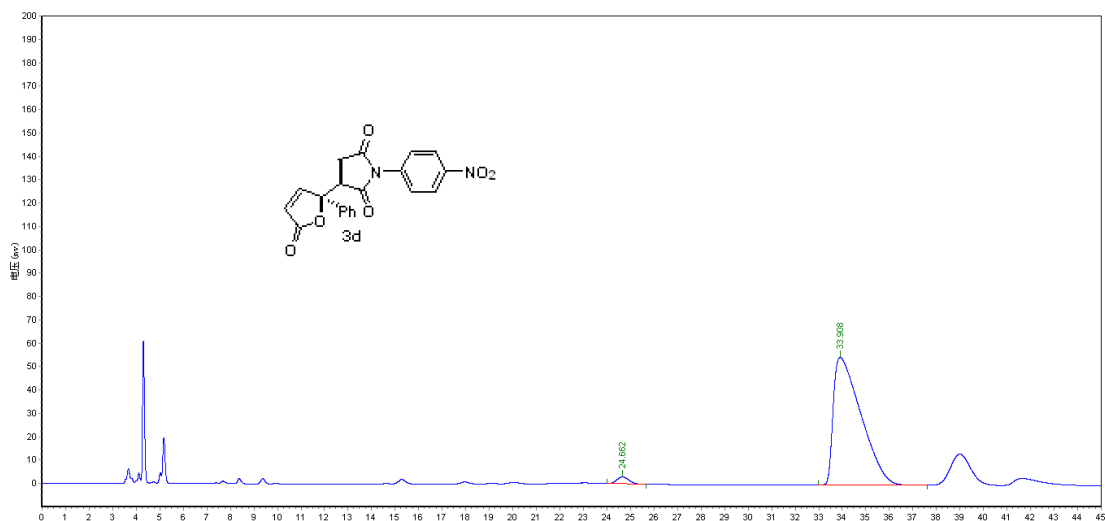

| Peak | RT(min.) | Height(mV*sec) | Area(mV)    | Area(%) |
|------|----------|----------------|-------------|---------|
| 1    | 24.662   | 2932.684       | 105683.656  | 2.3138  |
| 2    | 33.908   | 54679.594      | 4461807.000 | 97.6862 |

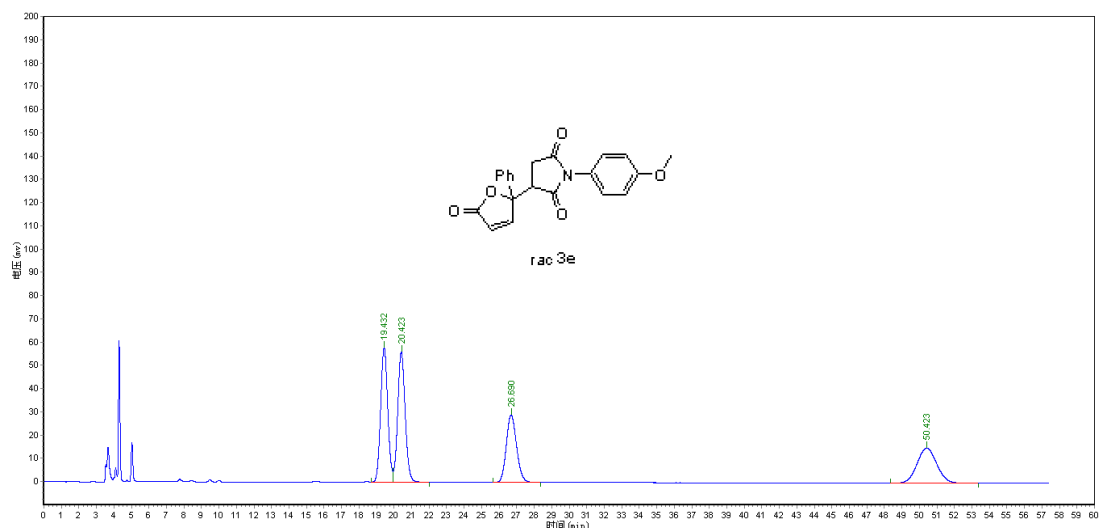

| Peak | RT(min.) | Height(mV*sec) | Area(mV)    | Area(%) |
|------|----------|----------------|-------------|---------|
| 1    | 19.432   | 57761.852      | 1635921.500 | 28.9201 |
| 2    | 20.423   | 55882.164      | 1651876.000 | 29.2021 |
| 3    | 26.690   | 29064.914      | 1184007.875 | 20.9311 |
| 4    | 50.423   | 15070.583      | 1184890.500 | 20.9467 |

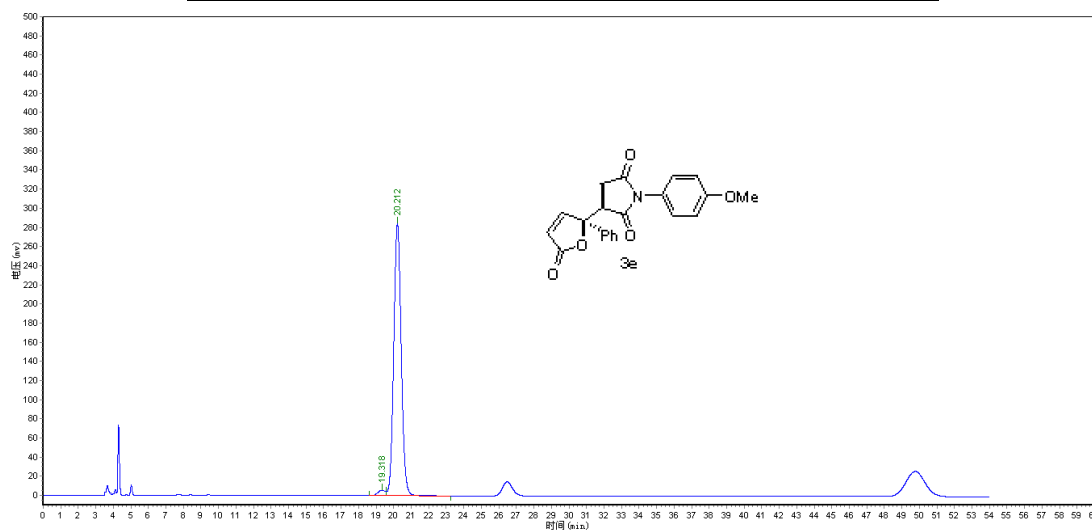

| Peak | RT(min.) | Height(mV*sec) | Area(mV)    | Area(%) |
|------|----------|----------------|-------------|---------|
| 1    | 19.318   | 5826.944       | 170418.234  | 1.9786  |
| 2    | 20.212   | 284050.094     | 8442448.000 | 98.0214 |

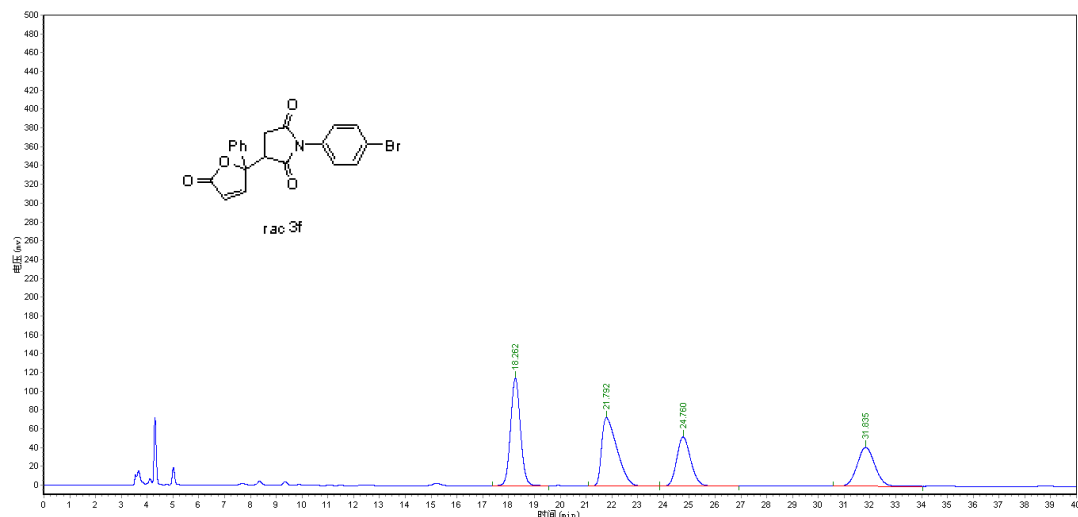

| Peak | RT(min.) | Height(mV*sec) | Area(mV)    | Area(%) |
|------|----------|----------------|-------------|---------|
| 1    | 18.262   | 114452.703     | 3024875.500 | 30.4120 |
| 2    | 21.792   | 72564.633      | 2990599.250 | 30.0674 |
| 3    | 24.760   | 52331.043      | 1964496.375 | 19.7510 |
| 4    | 31.835   | 41344.438      | 1966348.500 | 19.7696 |

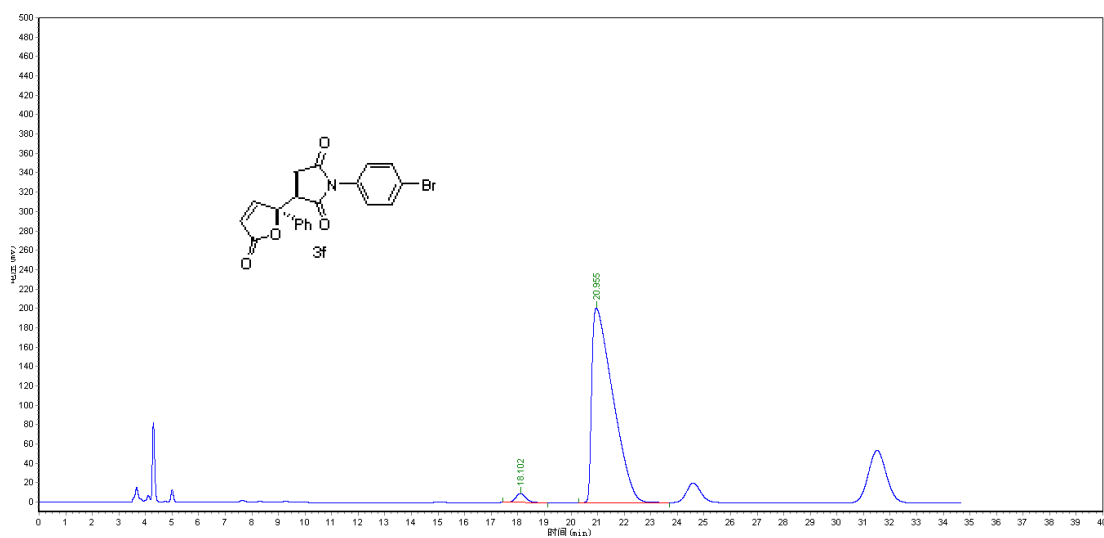

| Peak | RT(min.) | Height(mV*sec) | Area(mV)     | Area(%) |
|------|----------|----------------|--------------|---------|
| 1    | 18.102   | 9226.181       | 244508.594   | 2.1636  |
| 2    | 20.955   | 200903.344     | 11056358.000 | 97.8364 |

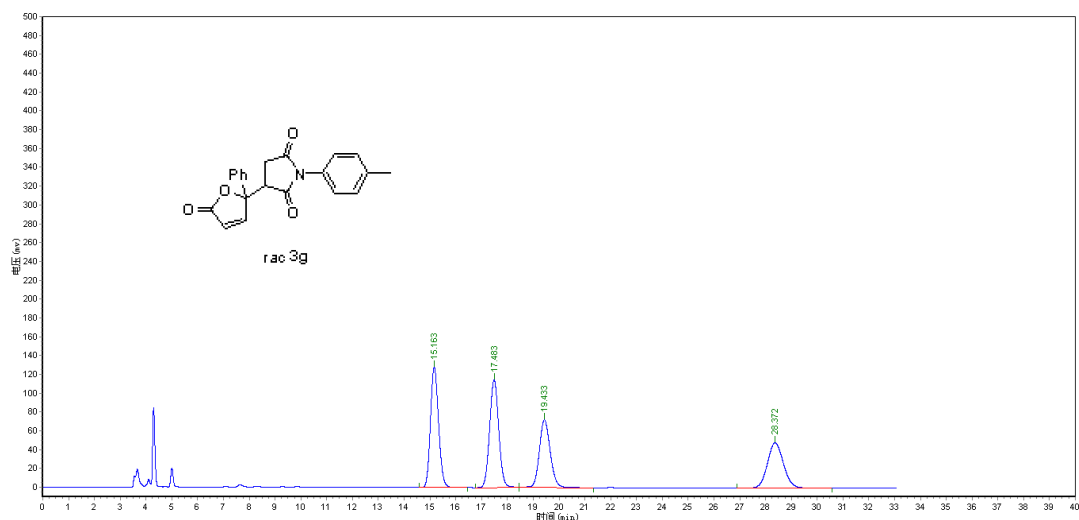

| Peak | RT(min.) | Height(mV*sec) | Area(mV)    | Area(%) |
|------|----------|----------------|-------------|---------|
| 1    | 15.163   | 128059.516     | 2787174.750 | 28.8031 |
| 2    | 17.483   | 114241.711     | 2782915.250 | 28.7591 |
| 3    | 19.433   | 71556.125      | 2057388.375 | 21.2614 |
| 4    | 28.372   | 48012.992      | 2049166.625 | 21.1764 |

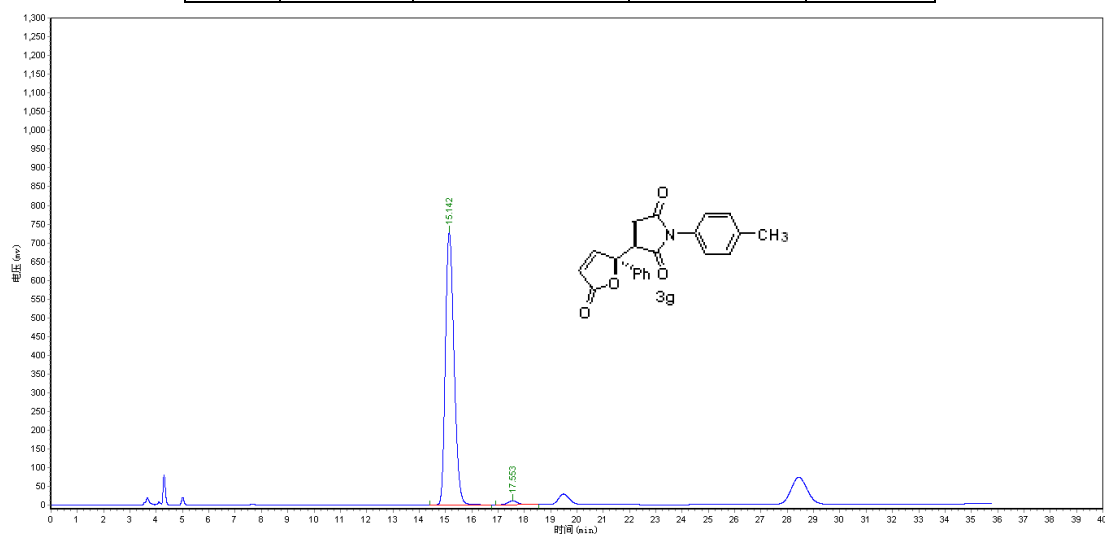

| Peak | RT(min.) | Height(mV*sec) | Area(mV)     | Area(%) |
|------|----------|----------------|--------------|---------|
| 1    | 15.142   | 726830.813     | 16555297.000 | 98.4366 |
| 2    | 17.553   | 10837.622      | 262939.219   | 1.5634  |

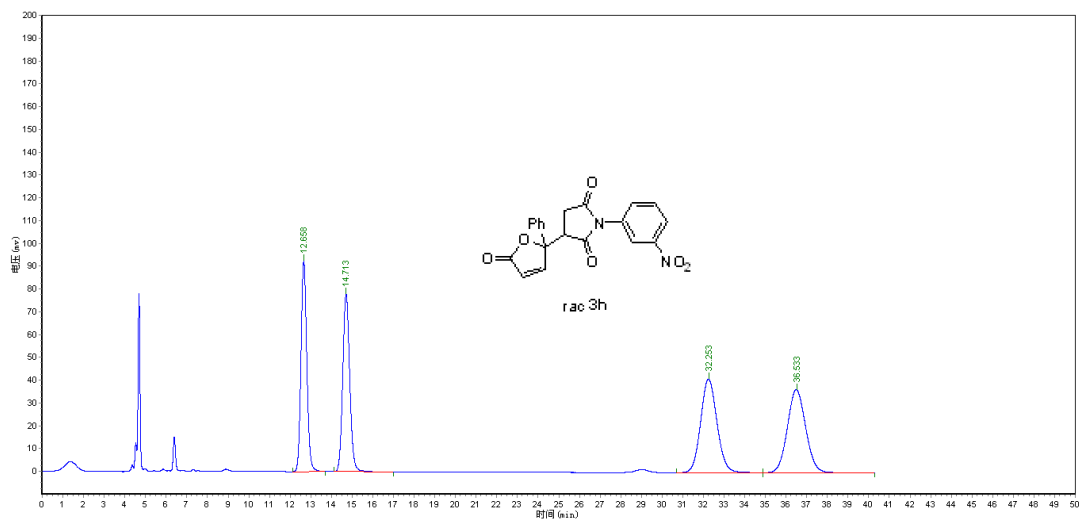

| Peak | RT(min.) | Height(mV*sec) | Area(mV)    | Area(%) |
|------|----------|----------------|-------------|---------|
| 1    | 12.658   | 92224.664      | 1811916.875 | 22.2138 |
| 2    | 14.713   | 77898.031      | 1824431.000 | 22.3673 |
| 3    | 32.253   | 41036.988      | 2260634.000 | 27.7151 |
| 4    | 36.533   | 36368.492      | 2259718.250 | 27.7038 |

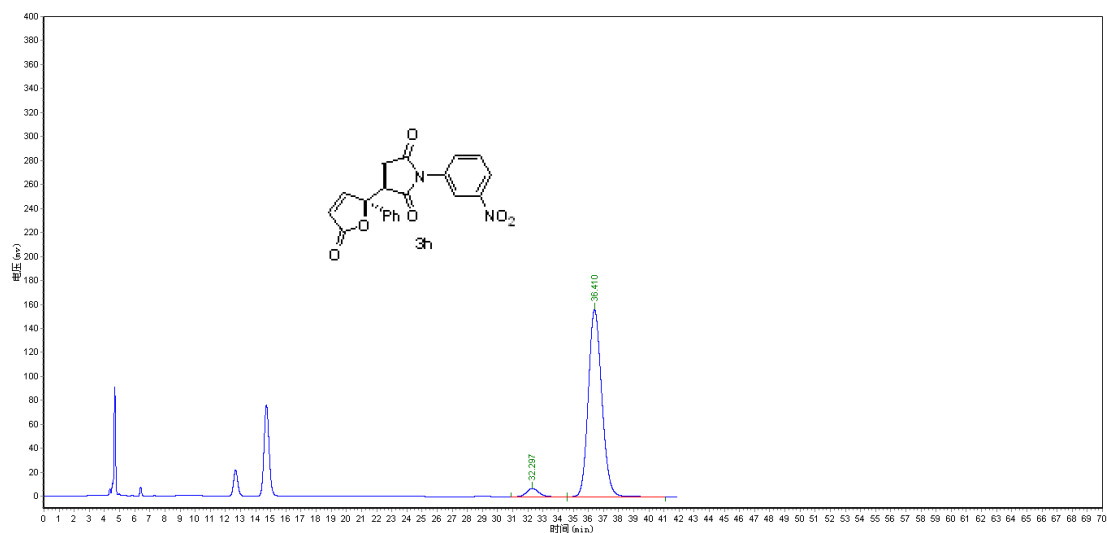

| Peak | RT(min.) | Height(mV*sec) | Area(mV)    | Area(%) |
|------|----------|----------------|-------------|---------|
| 1    | 32.297   | 6919.000       | 385162.500  | 3.8357  |
| 2    | 36.410   | 155893.703     | 9656291.000 | 96.1643 |

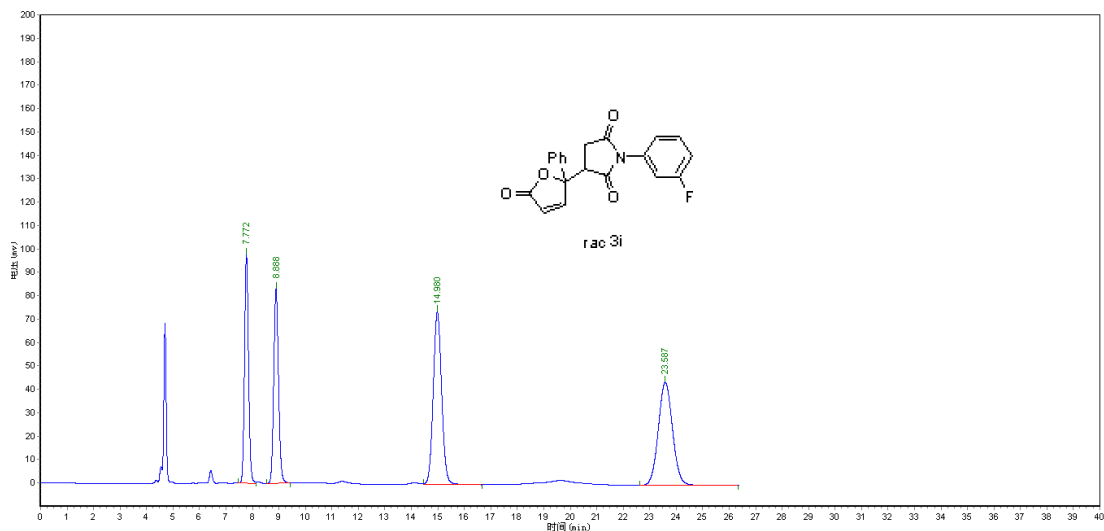

| Peak | RT(min.) | Height(mV*sec) | Area(mV)    | Area(%) |
|------|----------|----------------|-------------|---------|
| 1    | 7.772    | 97670.523      | 1028732.688 | 19.2422 |
| 2    | 8.888    | 83011.320      | 1038802.813 | 19.4306 |
| 3    | 14.980   | 73744.578      | 1635231.875 | 30.5866 |
| 4    | 23.587   | 43961.000      | 1643467.000 | 30.7406 |

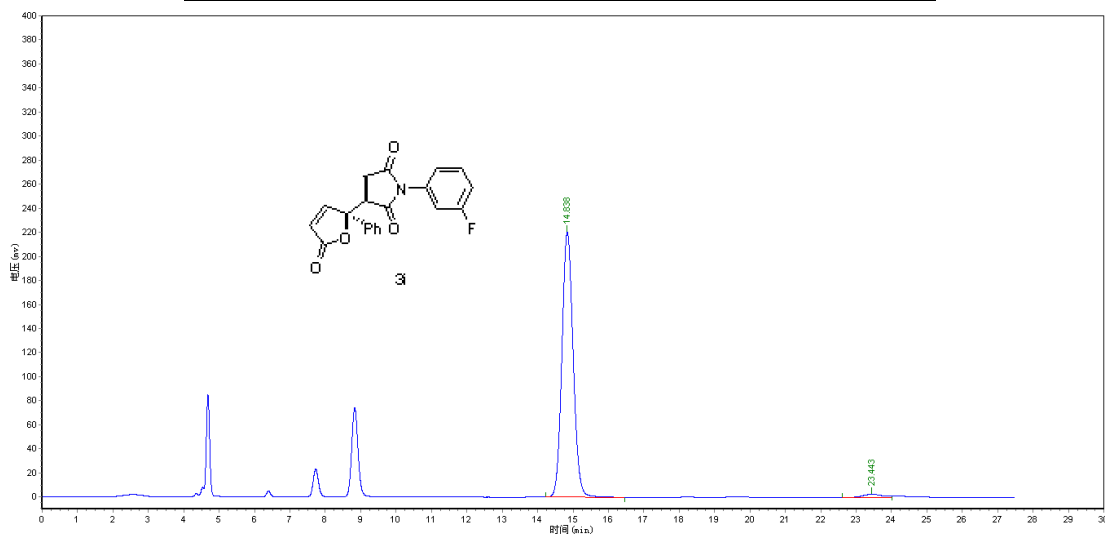

| Peak | RT(min.) | Height(mV*sec) | Area(mV)    | Area(%) |
|------|----------|----------------|-------------|---------|
| 1    | 14.838   | 220288.359     | 4851764.500 | 97.7737 |
| 2    | 23.443   | 2743.550       | 110472.367  | 2.2263  |



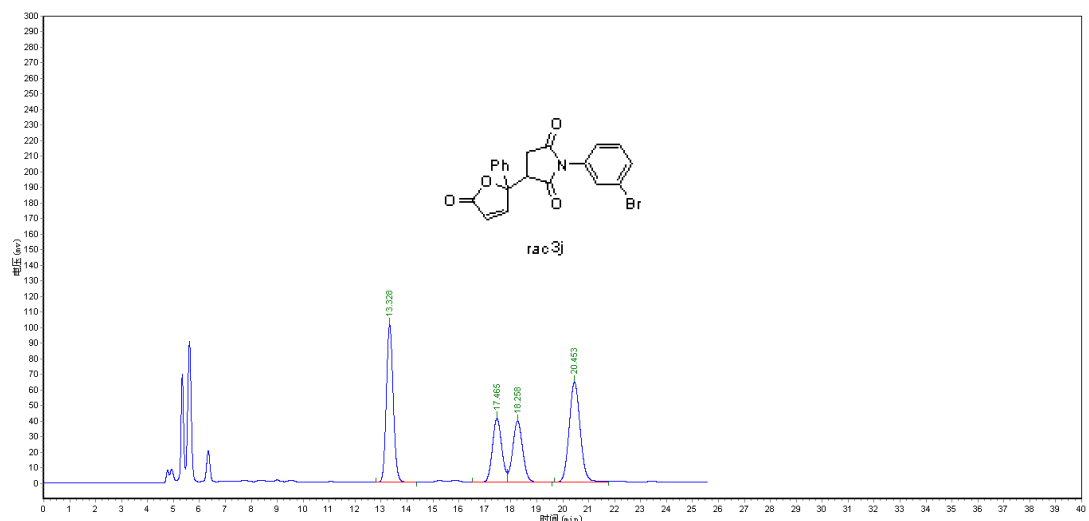

| Peak | RT(min.) | Height(mV*sec) | Area(mV)    | Area(%) |
|------|----------|----------------|-------------|---------|
| 1    | 13.328   | 101027.859     | 1858826.750 | 31.7527 |
| 2    | 17.465   | 41067.301      | 1032279.625 | 17.6335 |
| 3    | 18.258   | 39402.367      | 1049159.625 | 17.9219 |
| 4    | 20.453   | 64232.703      | 1913813.000 | 32.6920 |

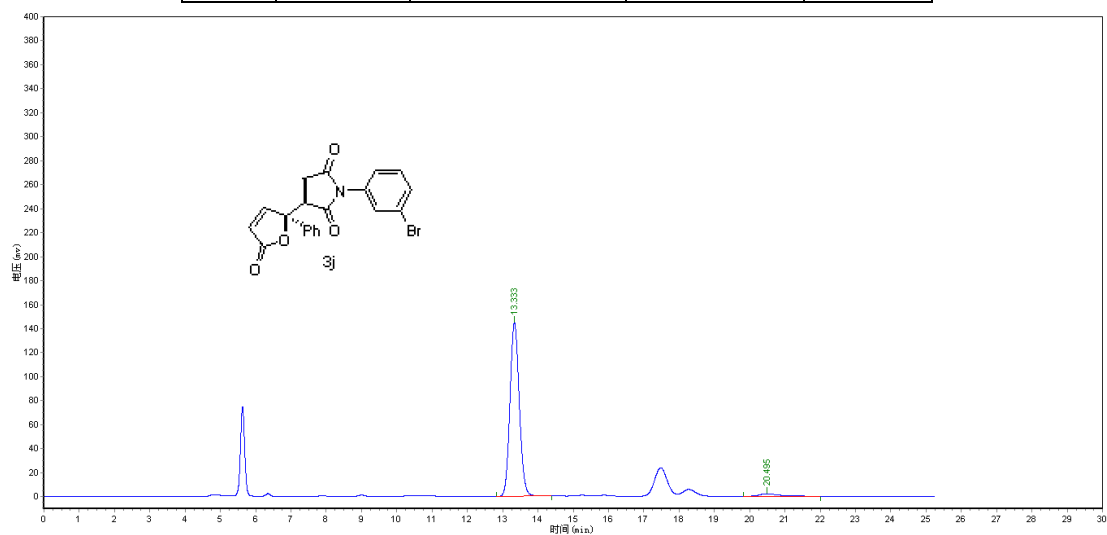

| Peak | RT(min.) | Height(mV*sec) | Area(mV)    | Area(%) |
|------|----------|----------------|-------------|---------|
| 1    | 13.333   | 144632.984     | 2657440.250 | 96.8791 |
| 2    | 20.495   | 2169.279       | 85608.852   | 3.1209  |

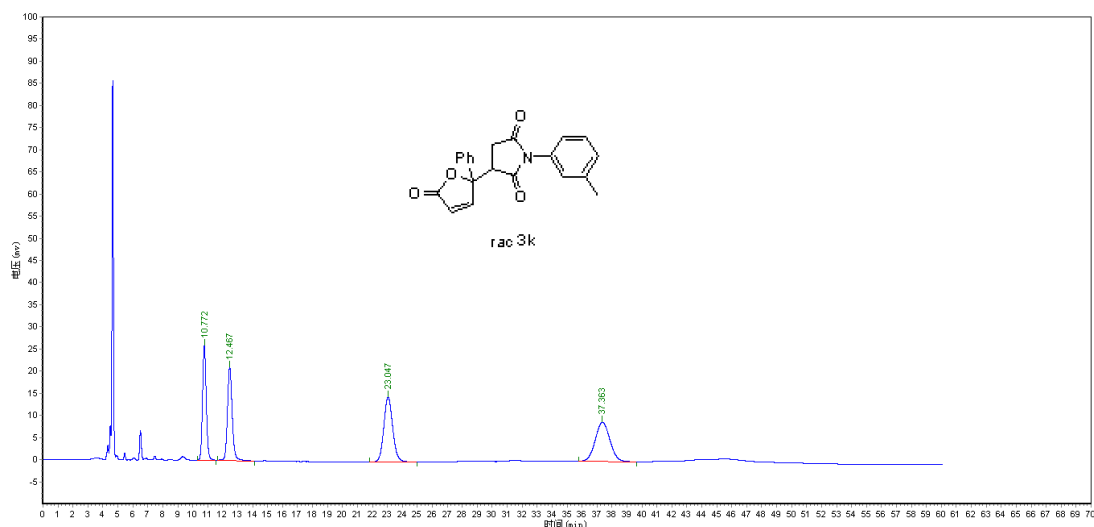

| Peak | RT(min.) | Height(mV*sec) | Area(mV)   | Area(%) |
|------|----------|----------------|------------|---------|
| 1    | 10.772   | 25790.639      | 450338.500 | 21.2231 |
| 2    | 12.467   | 21039.389      | 465095.813 | 21.9186 |
| 3    | 23.047   | 14664.769      | 607184.750 | 28.6148 |
| 4    | 37.363   | 8869.685       | 599303.750 | 28.2434 |

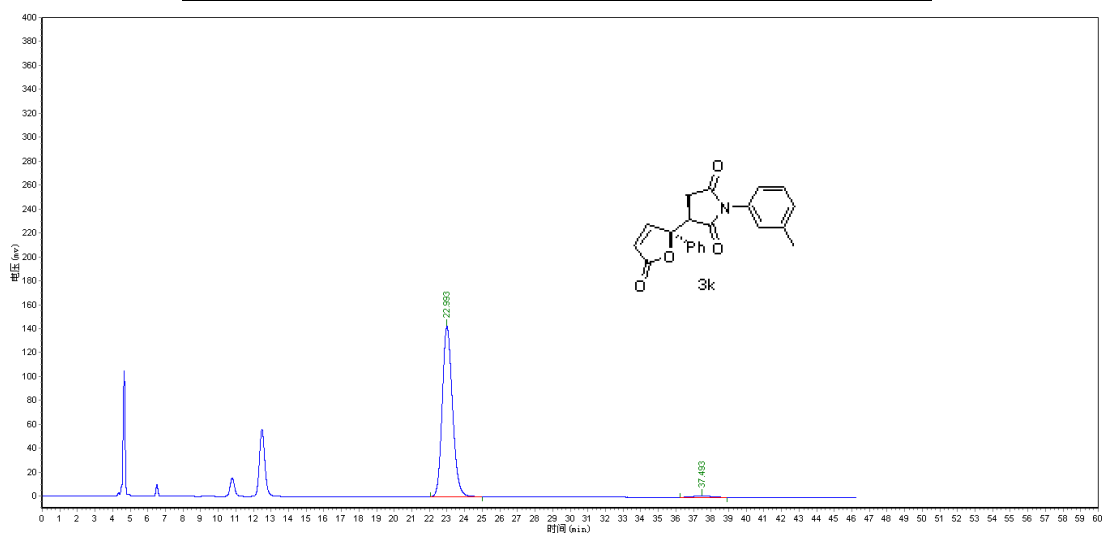

| Peak | RT(min.) | Height(mV*sec) | Area(mV)    | Area(%) |
|------|----------|----------------|-------------|---------|
| 1    | 22.993   | 142279.734     | 5753646.500 | 98.5164 |
| 2    | 37.493   | 1309.790       | 86646.500   | 1.4836  |

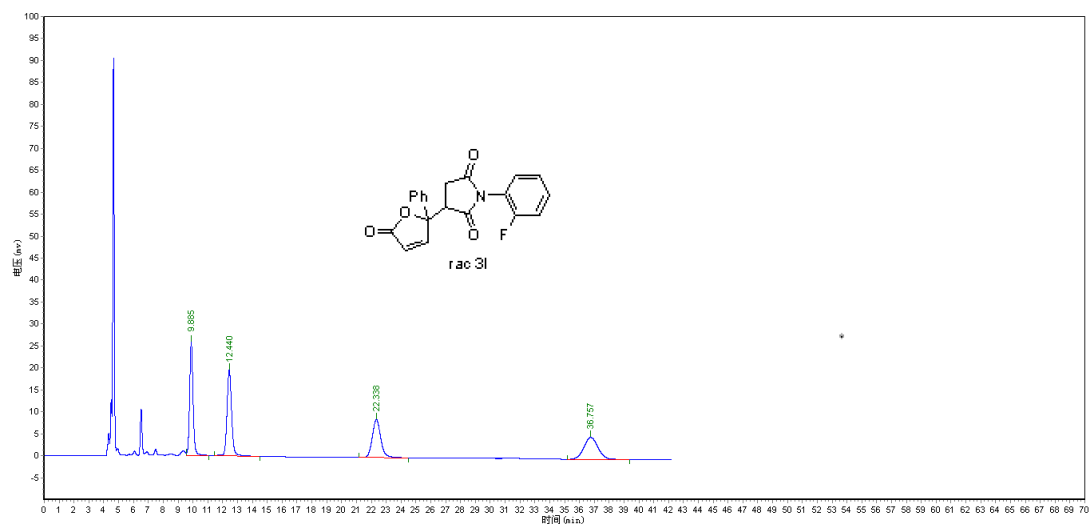

| Peak | RT(min.) | Height(mV*sec) | Area(mV)   | Area(%) |
|------|----------|----------------|------------|---------|
| 1    | 9.885    | 25732.828      | 413401.813 | 27.5238 |
| 2    | 12.440   | 19578.805      | 419018.906 | 27.8978 |
| 3    | 22.338   | 8664.123       | 339509.750 | 22.6041 |
| 4    | 36.757   | 4986.944       | 330049.188 | 21.9743 |

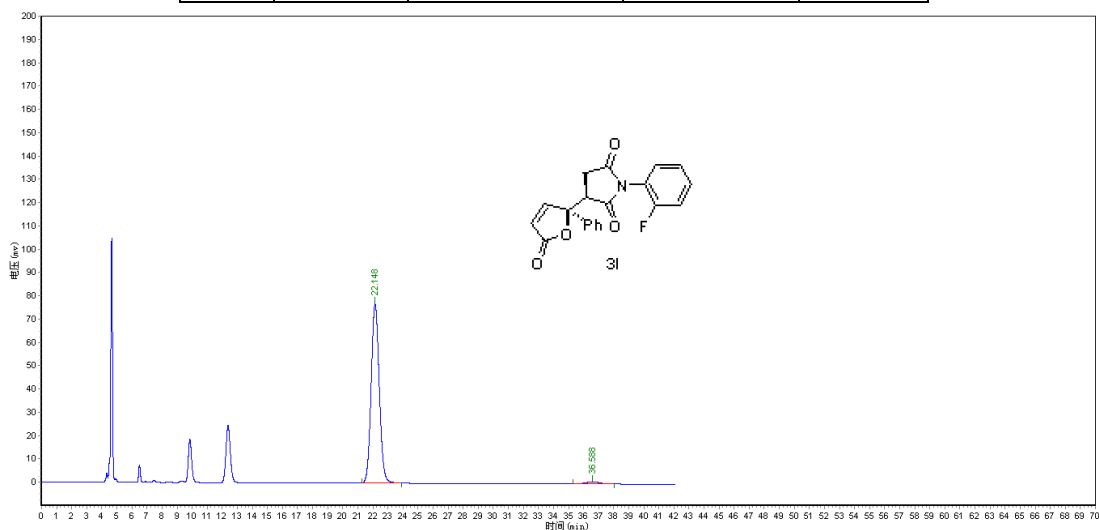

| Peak | RT(min.) | Height(mV*sec) | Area(mV)    | Area(%) |
|------|----------|----------------|-------------|---------|
| 1    | 22.148   | 76768.422      | 2871967.750 | 97.9200 |
| 2    | 36.588   | 915.418        | 61007.301   | 2.0800  |

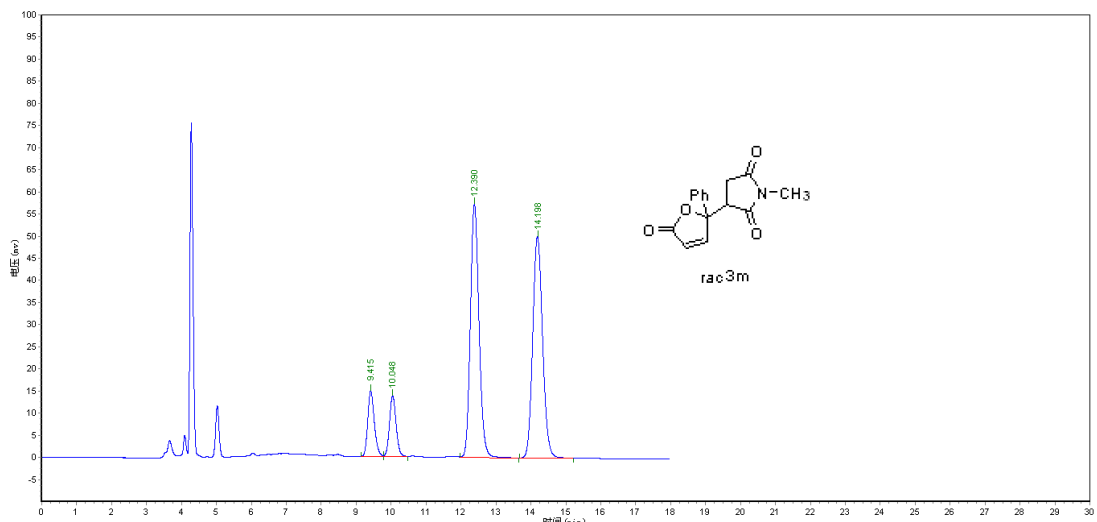

| Peak | RT(min.) | Height(mV*sec) | Area(mV)   | Area(%) |
|------|----------|----------------|------------|---------|
| 1    | 9.415    | 14727.787      | 192420.891 | 8.2399  |
| 2    | 10.048   | 13639.313      | 178425.609 | 7.6406  |
| 3    | 12.390   | 57144.816      | 980144.188 | 41.9722 |
| 4    | 14.198   | 50075.836      | 984233.188 | 42.1473 |

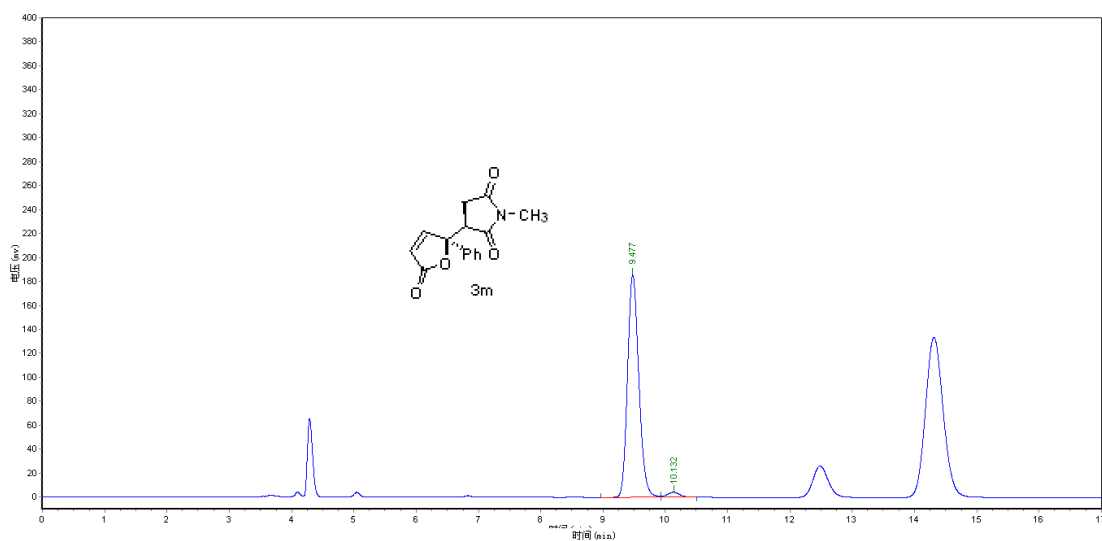

| Peak | RT(min.) | Height(mV*sec) | Area(mV)    | Area(%) |
|------|----------|----------------|-------------|---------|
| 1    | 9.477    | 185365.203     | 2334369.750 | 97.5868 |
| 2    | 10.132   | 4098.399       | 57724.930   | 2.4132  |

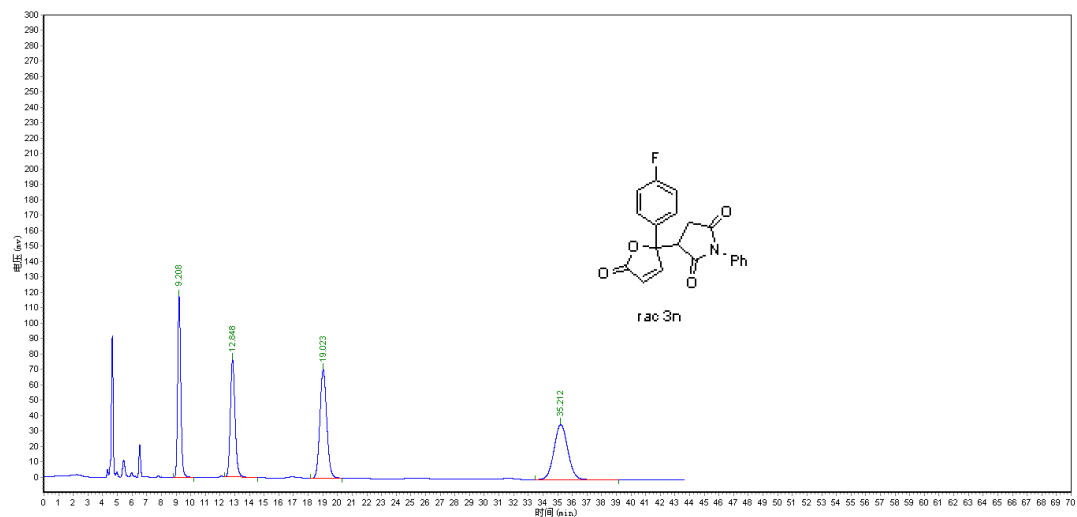

| Peak | RT(min.) | Height(mV*sec) | Area(mV)    | Area(%) |
|------|----------|----------------|-------------|---------|
| 1    | 9.208    | 117397.227     | 1733921.125 | 21.4878 |
| 2    | 12.848   | 76436.258      | 1720065.875 | 21.3161 |
| 3    | 19.023   | 70366.297      | 2282811.500 | 28.2900 |
| 4    | 35.212   | 35826.762      | 2332523.750 | 28.9061 |

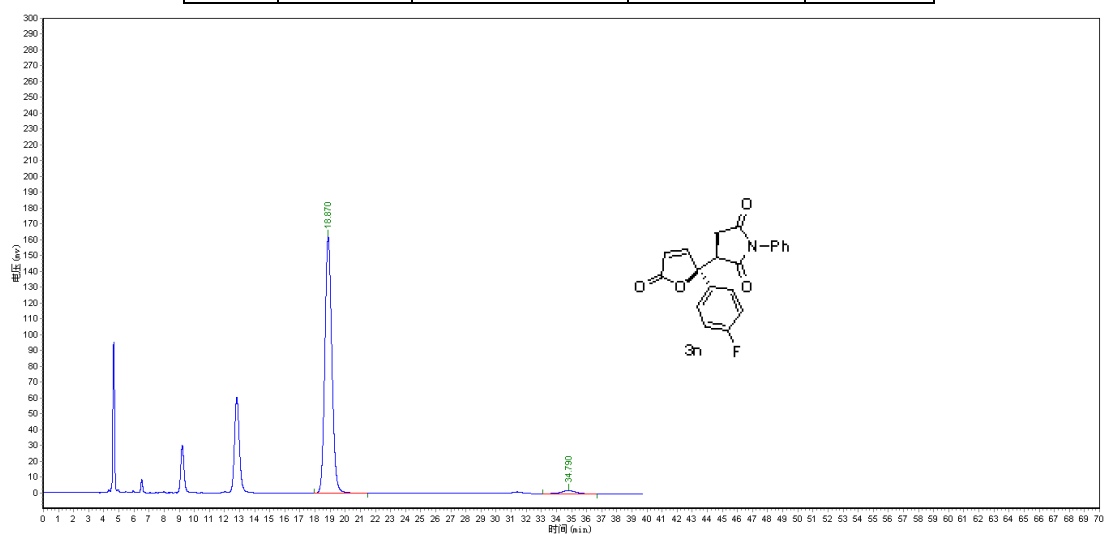

| Peak | RT(min.) | Height(mV*sec) | Area(mV)    | Area(%) |
|------|----------|----------------|-------------|---------|
| 1    | 18.870   | 162153.719     | 5225613.000 | 97.6185 |
| 2    | 34.790   | 1942.891       | 127482.547  | 2.3815  |

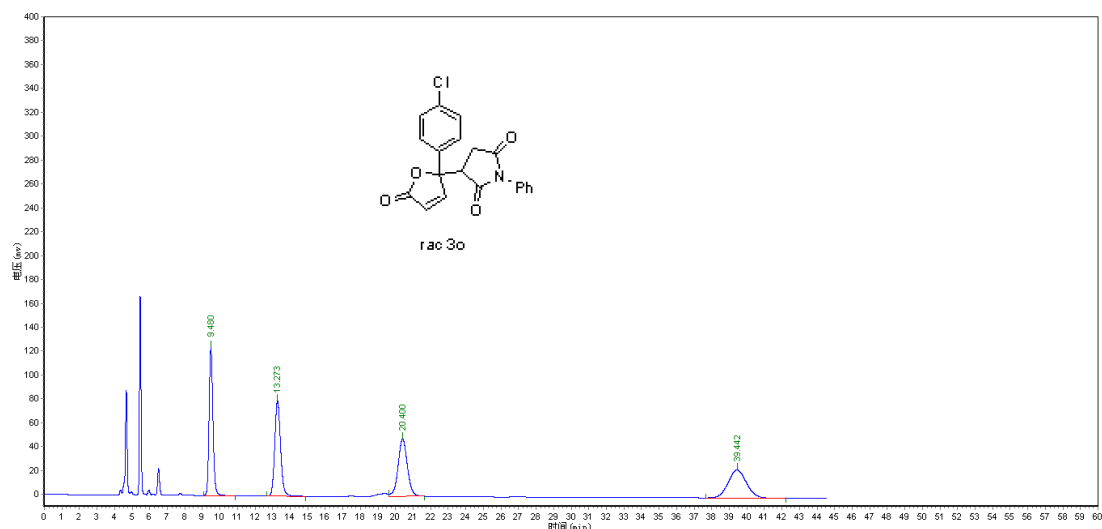

| Peak | RT(min.) | Height(mV*sec) | Area(mV)    | Area(%) |
|------|----------|----------------|-------------|---------|
| 1    | 9.480    | 123814.117     | 1898169.500 | 26.3160 |
| 2    | 13.273   | 80028.648      | 1844499.125 | 25.5719 |
| 3    | 20.400   | 48119.168      | 1769619.875 | 24.5338 |
| 4    | 39.442   | 23359.359      | 1700698.000 | 23.5783 |

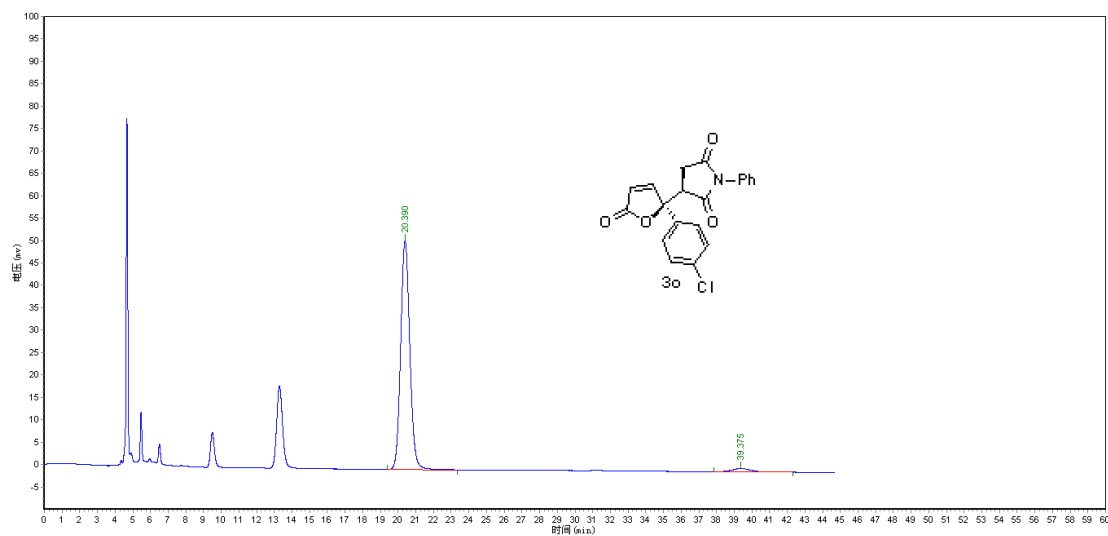

| Peak | RT(min.) | Height(mV*sec) | Area(mV)    | Area(%) |
|------|----------|----------------|-------------|---------|
| 1    | 20.390   | 51037.648      | 1836498.125 | 97.1532 |
| 2    | 39.375   | 733.065        | 53814.211   | 2.8468  |

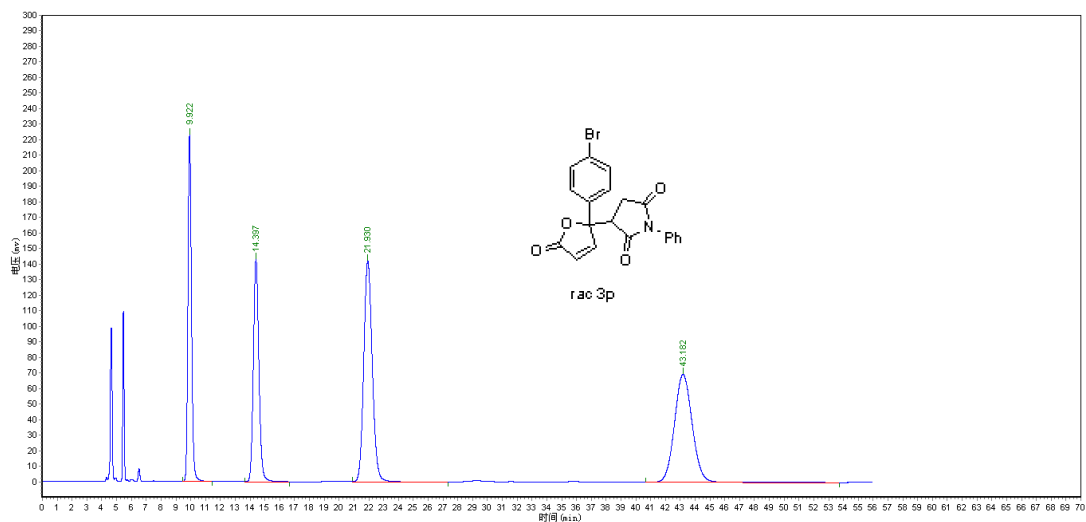

| Peak | RT(min.) | Height(mV*sec) | Area(mV)    | Area(%) |
|------|----------|----------------|-------------|---------|
| 1    | 9.922    | 222978.734     | 3705097.250 | 19.6432 |
| 2    | 14.397   | 143080.266     | 3709828.250 | 19.6683 |
| 3    | 21.930   | 142281.781     | 5699361.500 | 30.2161 |
| 4    | 43.182   | 69428.164      | 5747727.500 | 30.4725 |

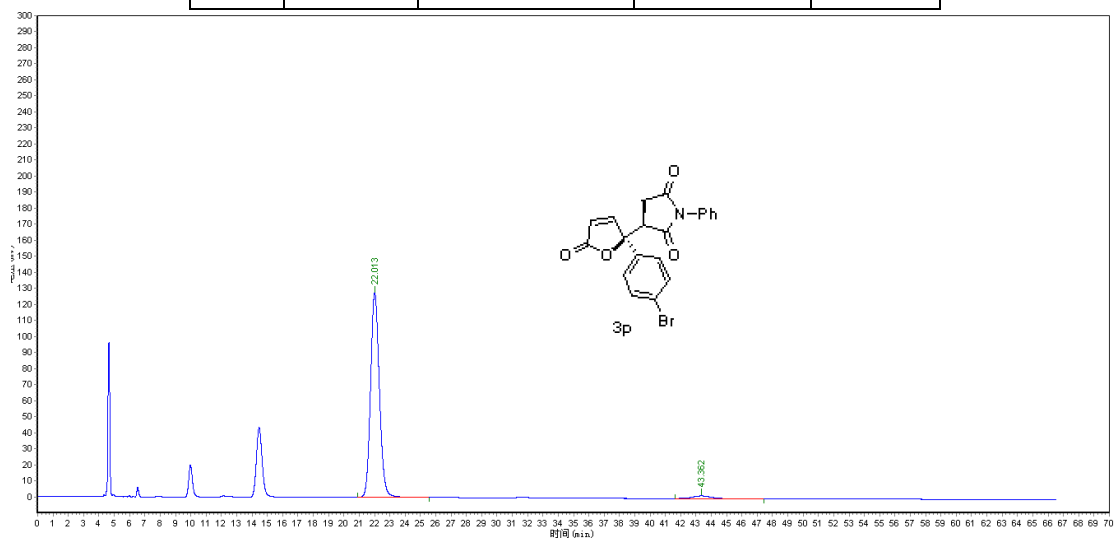

| Peak | RT(min.) | Height(mV*sec) | Area(mV)    | Area(%) |
|------|----------|----------------|-------------|---------|
| 1    | 22.013   | 127578.430     | 5107937.000 | 97.3259 |
| 2    | 43.362   | 1665.118       | 140344.688  | 2.6741  |

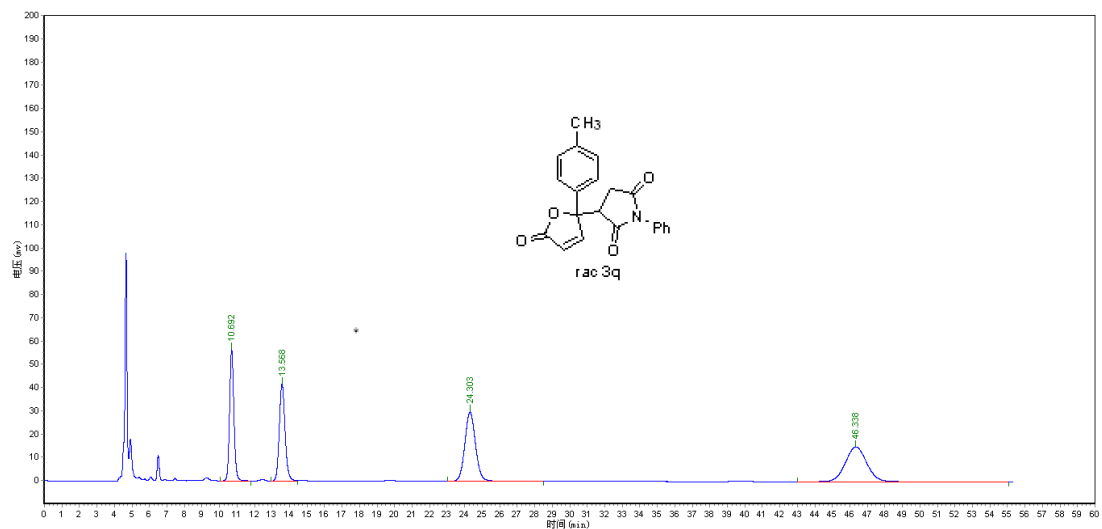

| Peak | RT(min.) | Height(mV*sec) | Area(mV)    | Area(%) |
|------|----------|----------------|-------------|---------|
| 1    | 10.692   | 56607.113      | 971988.938  | 21.6972 |
| 2    | 13.568   | 41793.234      | 962435.688  | 21.4840 |
| 3    | 24.303   | 29790.688      | 1263184.125 | 28.1974 |
| 4    | 46.338   | 14943.229      | 1282178.875 | 28.6214 |

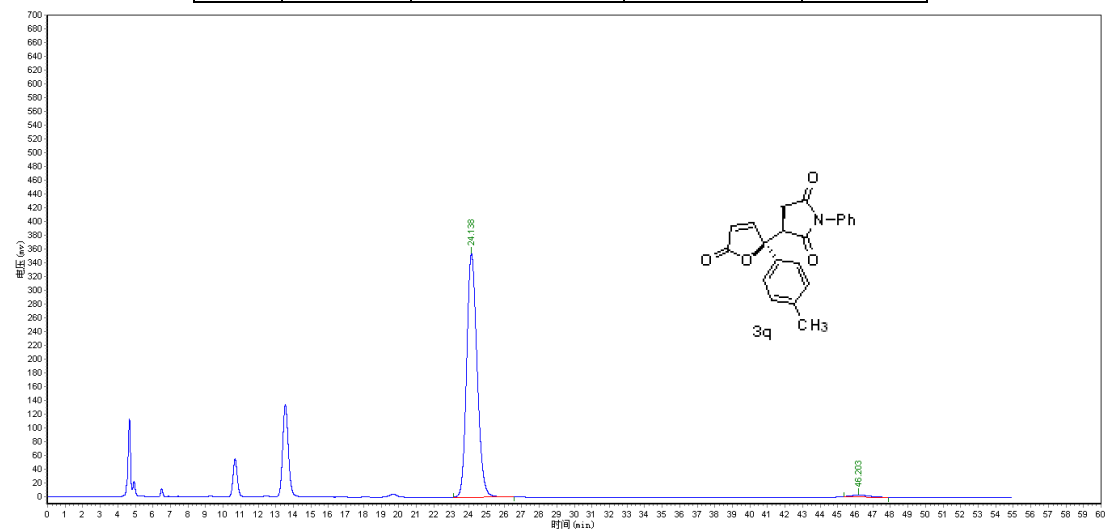

| Peak | RT(min.) | Height(mV*sec) | Area(mV)     | Area(%) |
|------|----------|----------------|--------------|---------|
| 1    | 24.138   | 353756.125     | 14585029.000 | 98.8712 |
| 2    | 46.203   | 2468.333       | 166508.406   | 1.1288  |



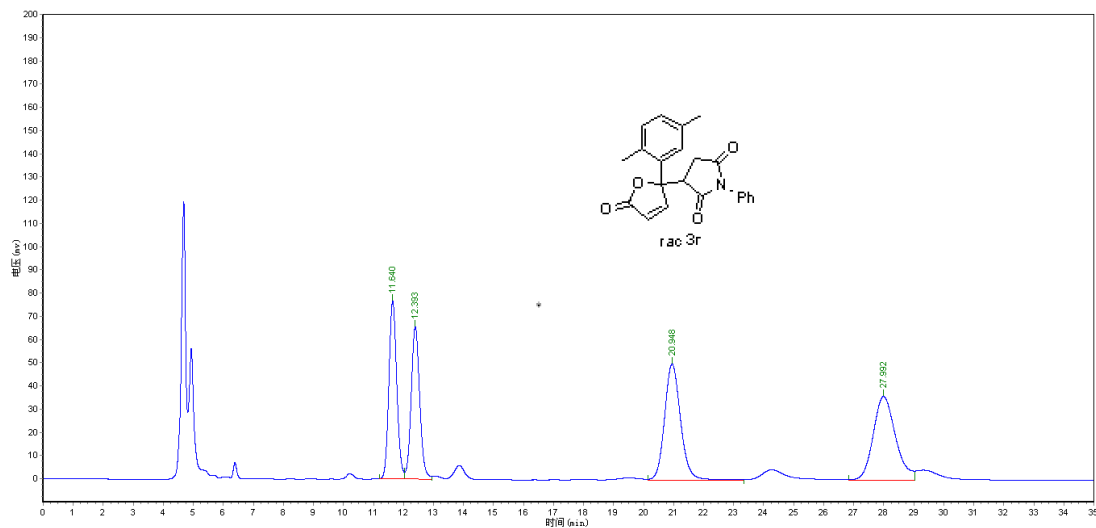

| Peak | RT(min.) | Height(mV*sec) | Area(mV)    | Area(%) |
|------|----------|----------------|-------------|---------|
| 1    | 11.640   | 76490.922      | 1393198.625 | 21.7014 |
| 2    | 12.393   | 65625.461      | 1298067.125 | 20.2195 |
| 3    | 20.948   | 49990.965      | 1858089.750 | 28.9428 |
| 4    | 27.992   | 36108.949      | 1870508.375 | 29.1363 |

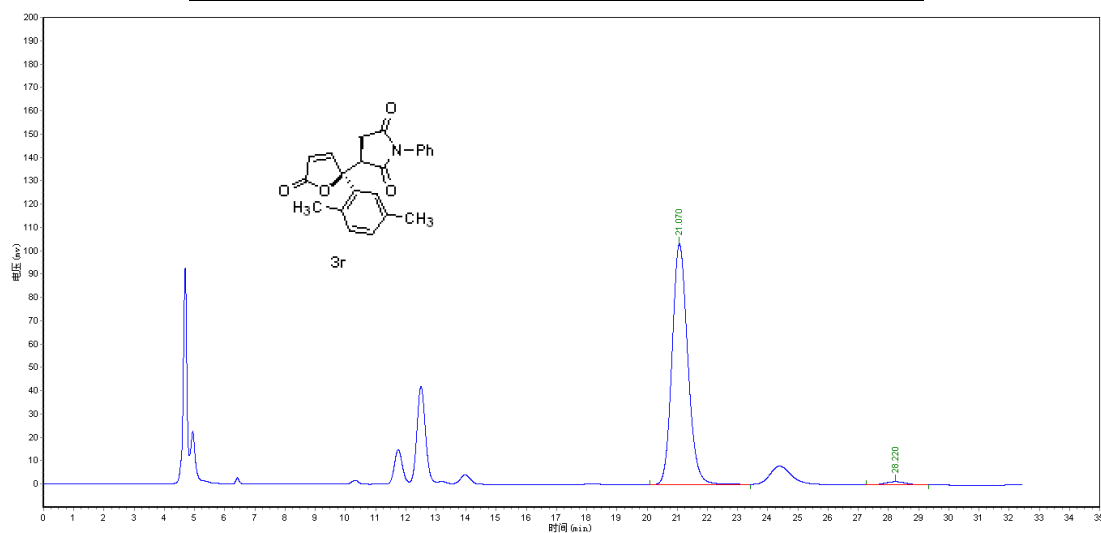

| Peak | RT(min.) | Height(mV*sec) | Area(mV)    | Area(%) |
|------|----------|----------------|-------------|---------|
| 1    | 21.070   | 103217.664     | 3741532.750 | 98.2636 |
| 2    | 28.220   | 1386.738       | 66115.500   | 1.7364  |

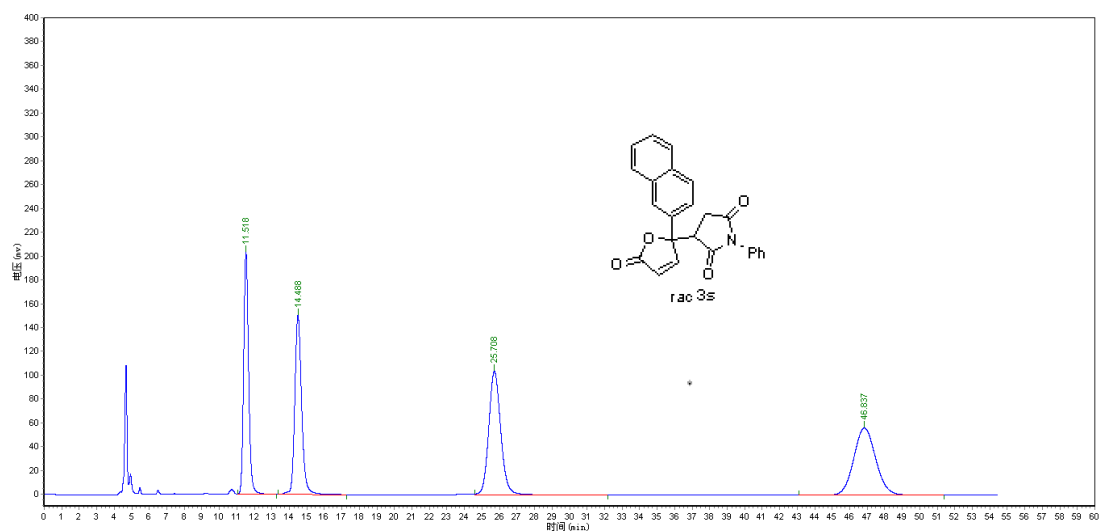

| Peak | RT(min.) | Height(mV*sec) | Area(mV)    | Area(%) |
|------|----------|----------------|-------------|---------|
| 1    | 11.518   | 203051.188     | 3994599.500 | 22.2269 |
| 2    | 14.488   | 150376.750     | 4083010.500 | 22.7188 |
| 3    | 25.708   | 103649.344     | 4959143.500 | 27.5938 |
| 4    | 46.837   | 56549.922      | 4935162.000 | 27.4604 |

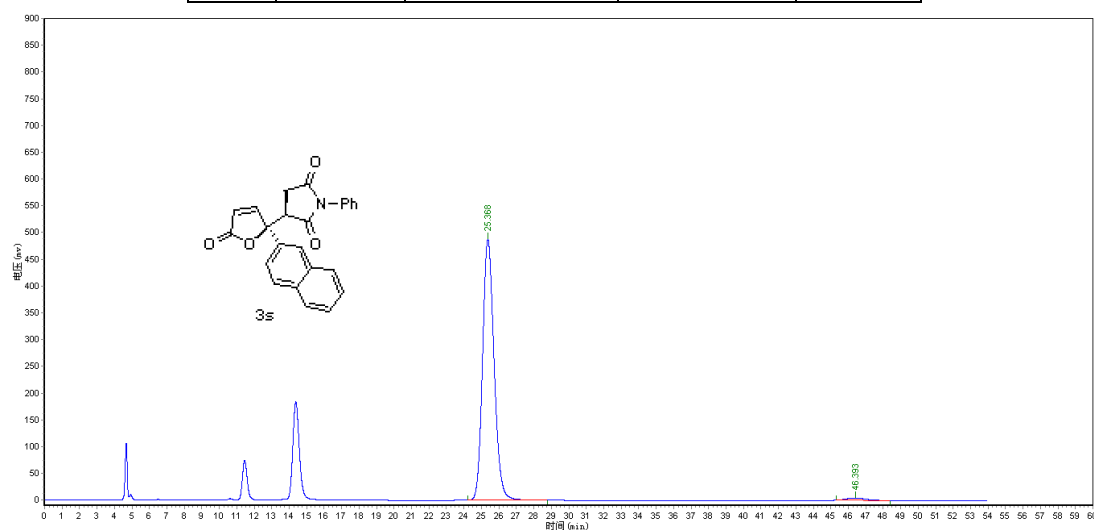

| Peak | RT(min.) | Height(mV*sec) | Area(mV)     | Area(%) |
|------|----------|----------------|--------------|---------|
| 1    | 25.368   | 487294.719     | 22296036.000 | 98.5912 |
| 2    | 46.393   | 4155.056       | 318602.688   | 1.4088  |

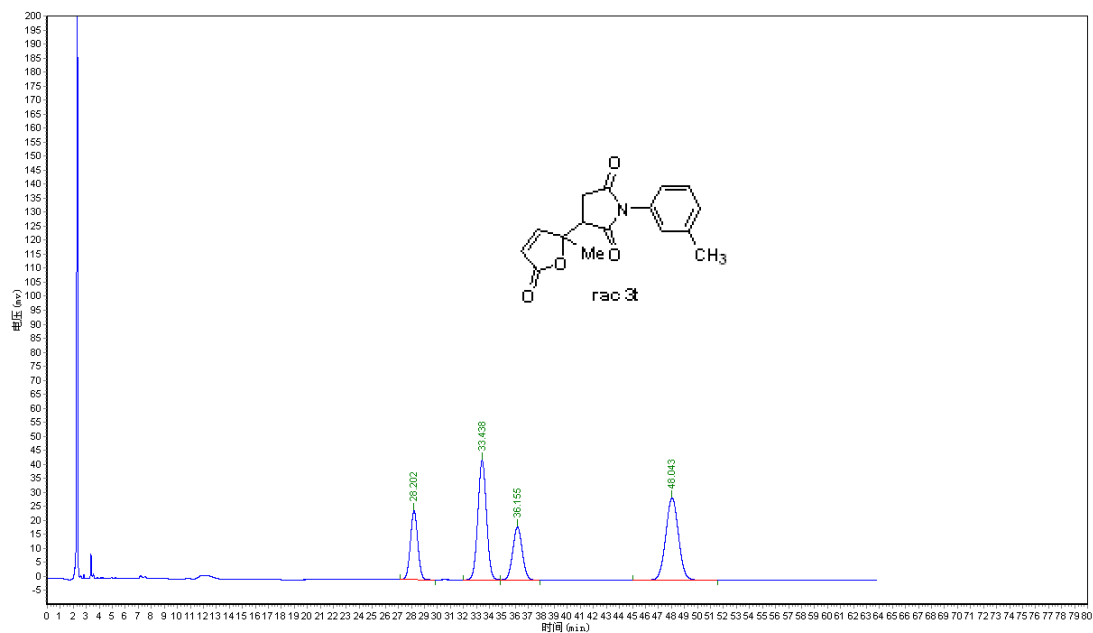

| Peak | RT(min.) | Height(mV*sec) | Area(mV)    | Area(%) |
|------|----------|----------------|-------------|---------|
| 1    | 28.202   | 24514.580      | 960622.500  | 16.2466 |
| 2    | 33.438   | 42597.605      | 1975107.625 | 33.4042 |
| 3    | 36.155   | 18898.092      | 964426.375  | 16.3109 |
| 4    | 48.043   | 29433.535      | 2012599.750 | 34.0383 |

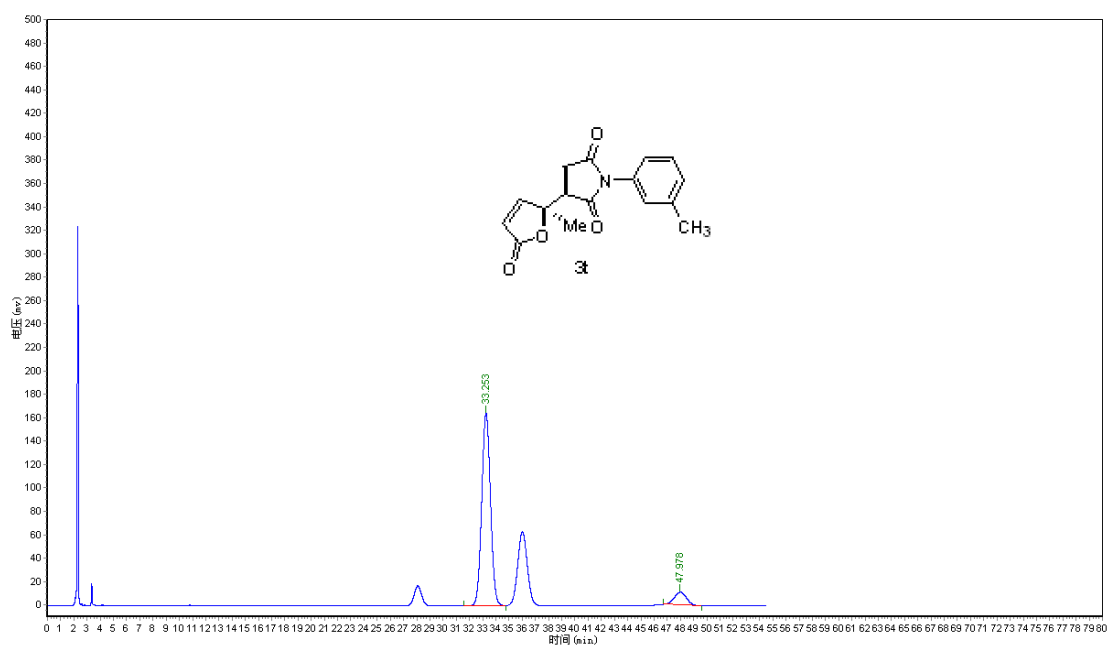

| Peak | RT(min.) | Height(mV*sec) | Area(mV)    | Area(%) |
|------|----------|----------------|-------------|---------|
| 1    | 33.253   | 164512.313     | 7615249.000 | 91.5508 |
| 2    | 47.978   | 10884.428      | 702814.000  | 8.4493  |

### Copies of NMR spectra

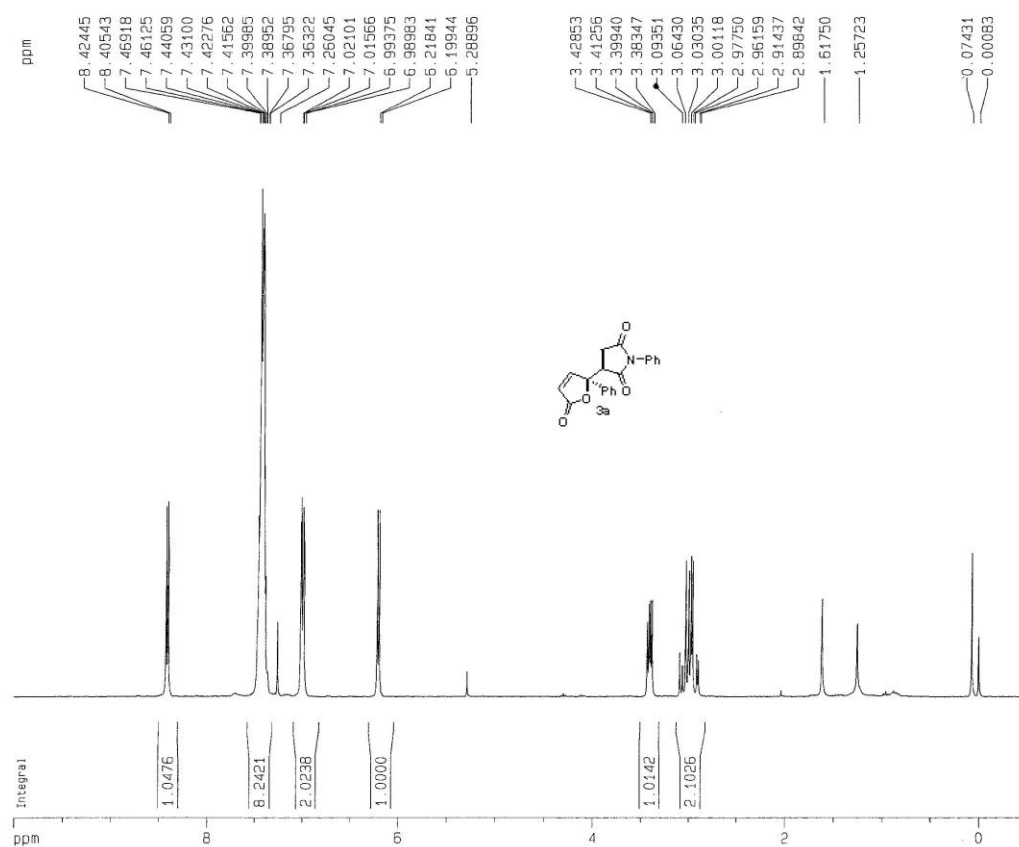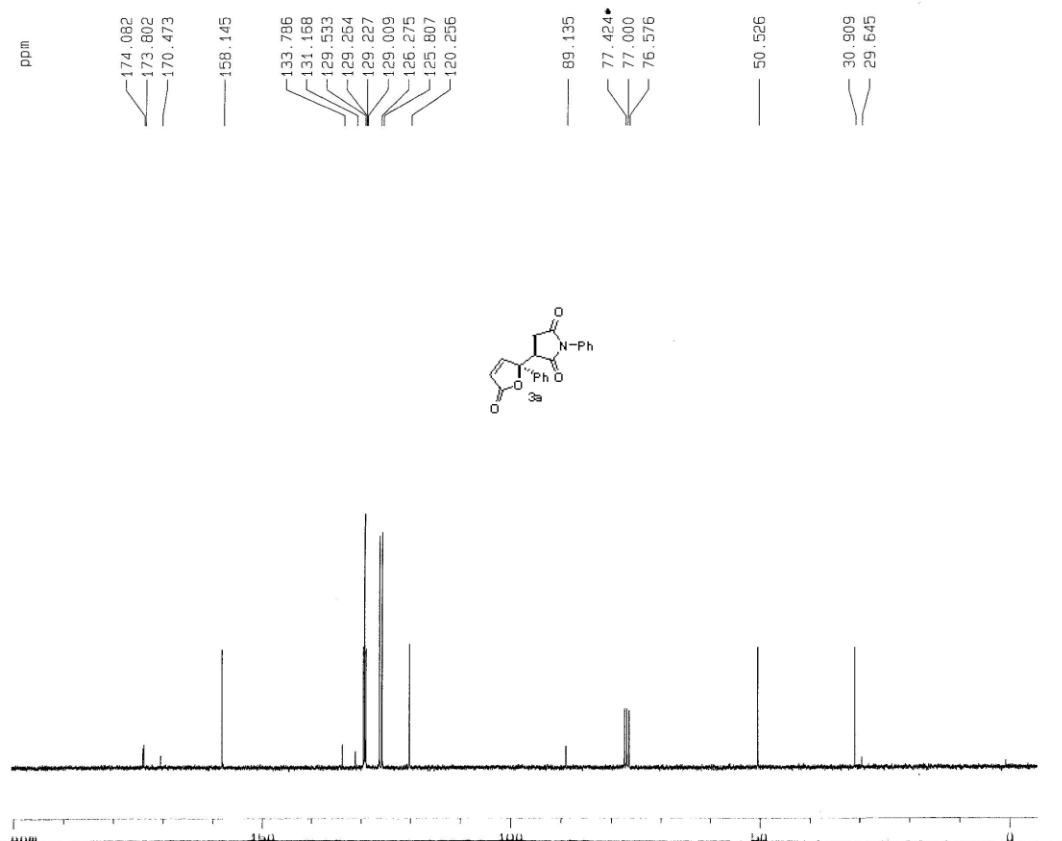

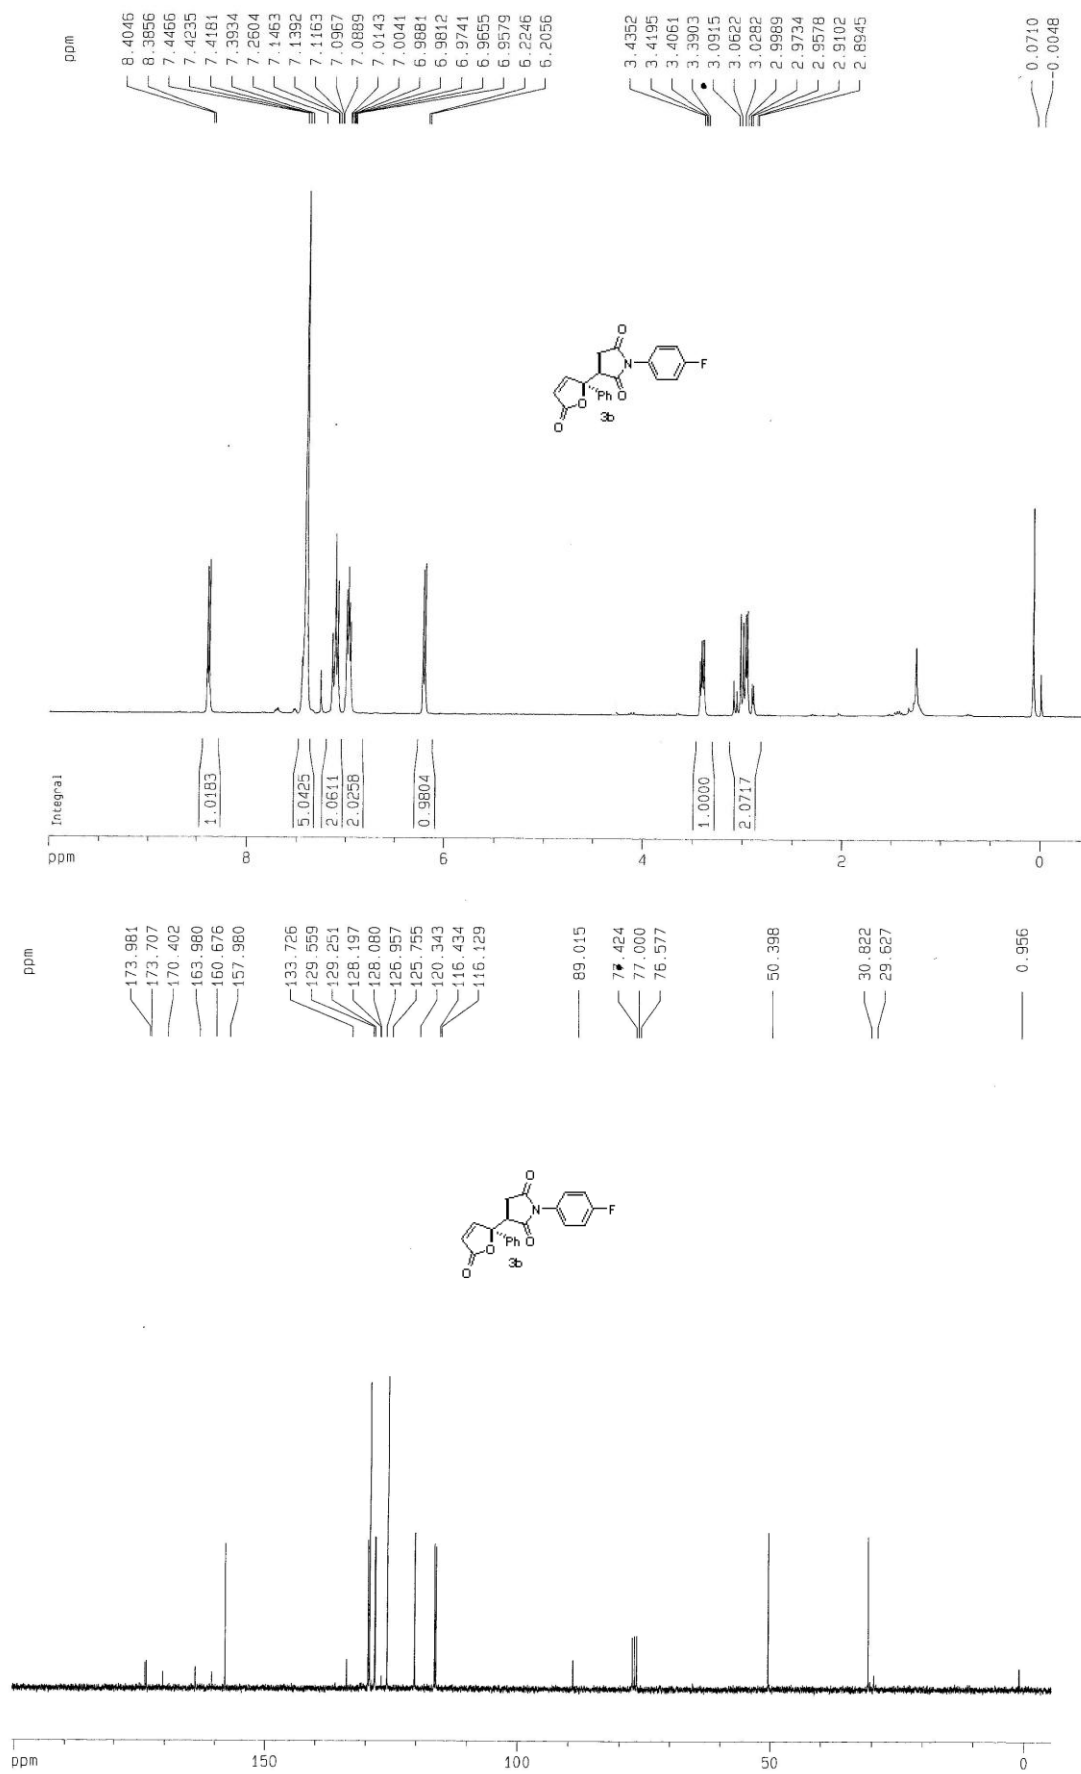

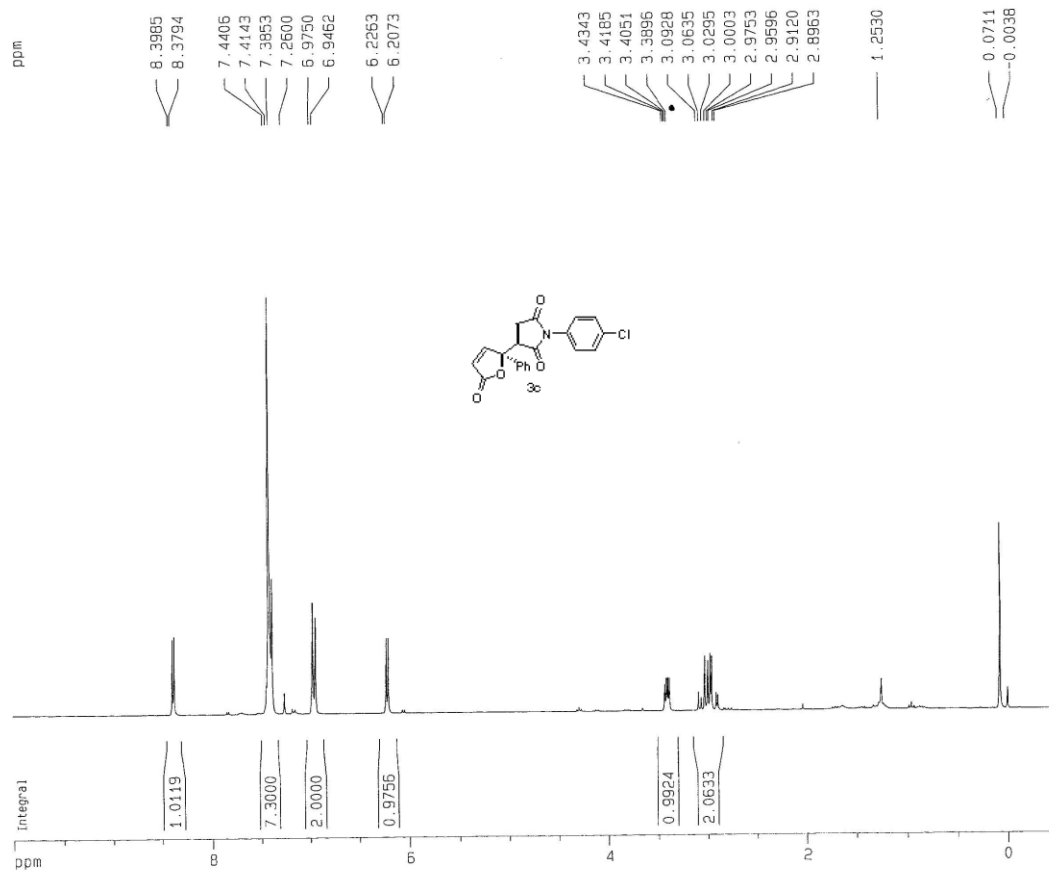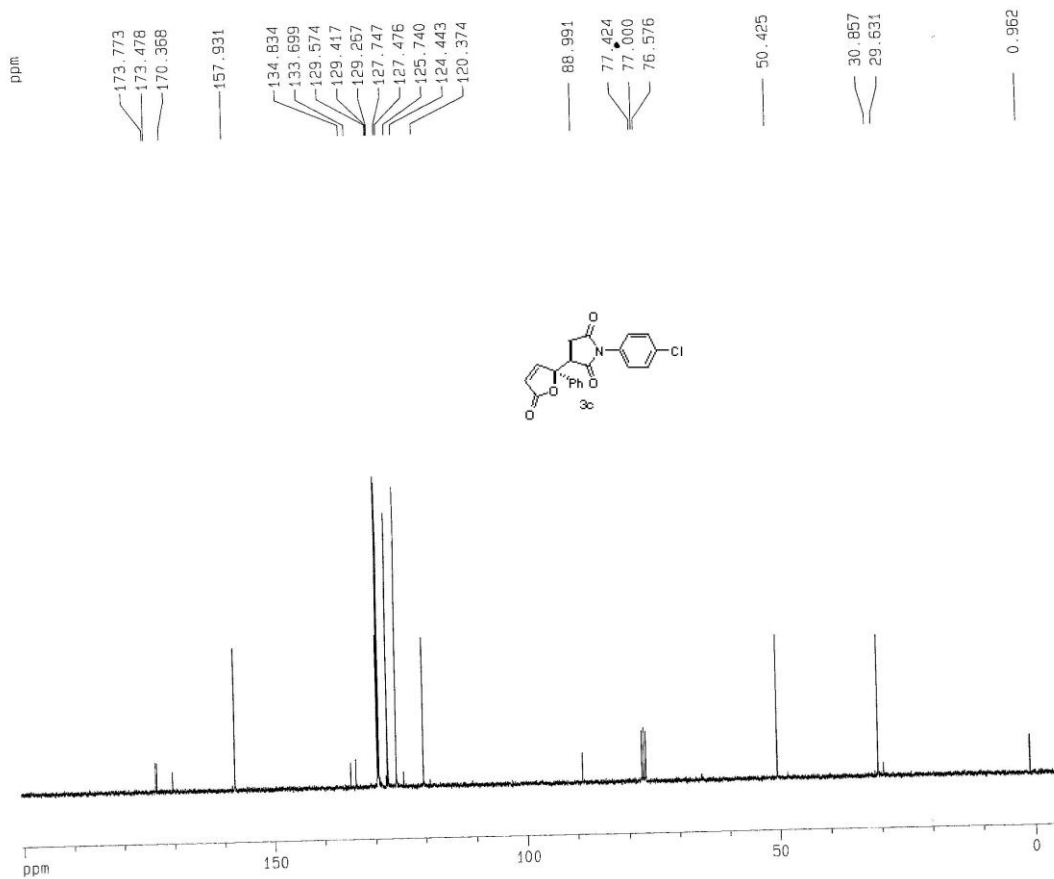

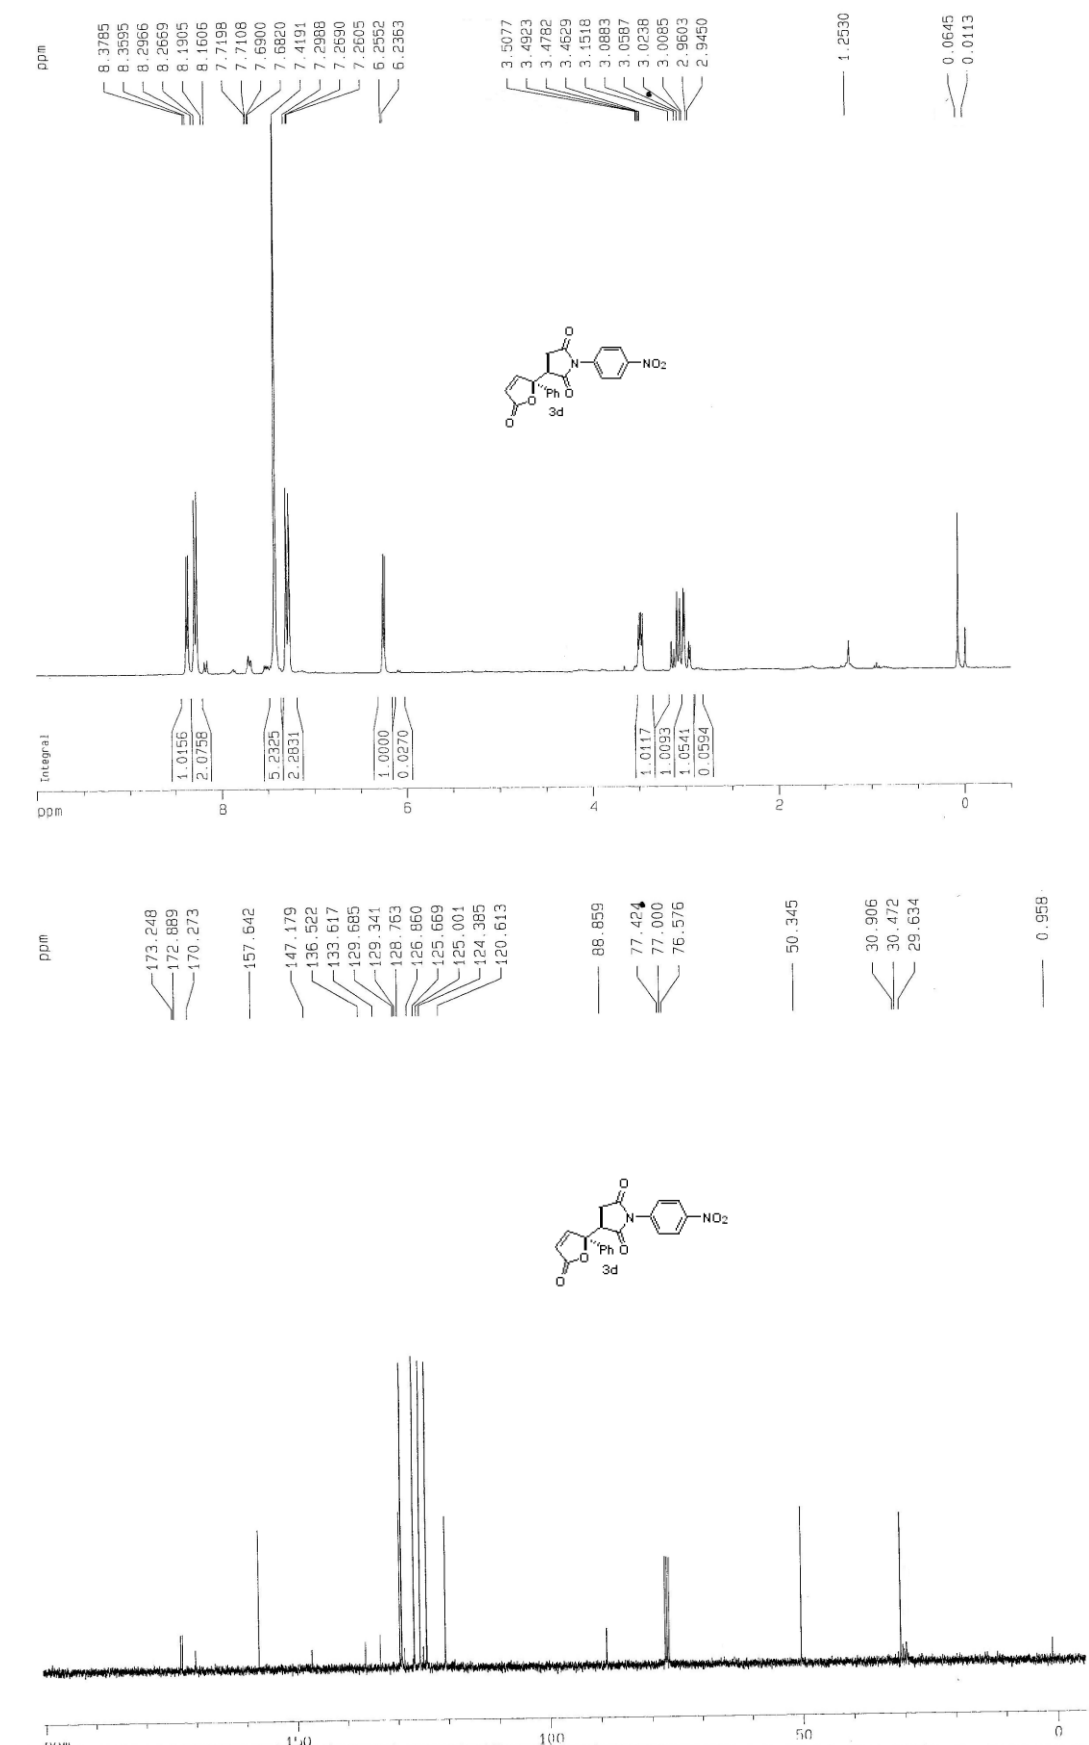

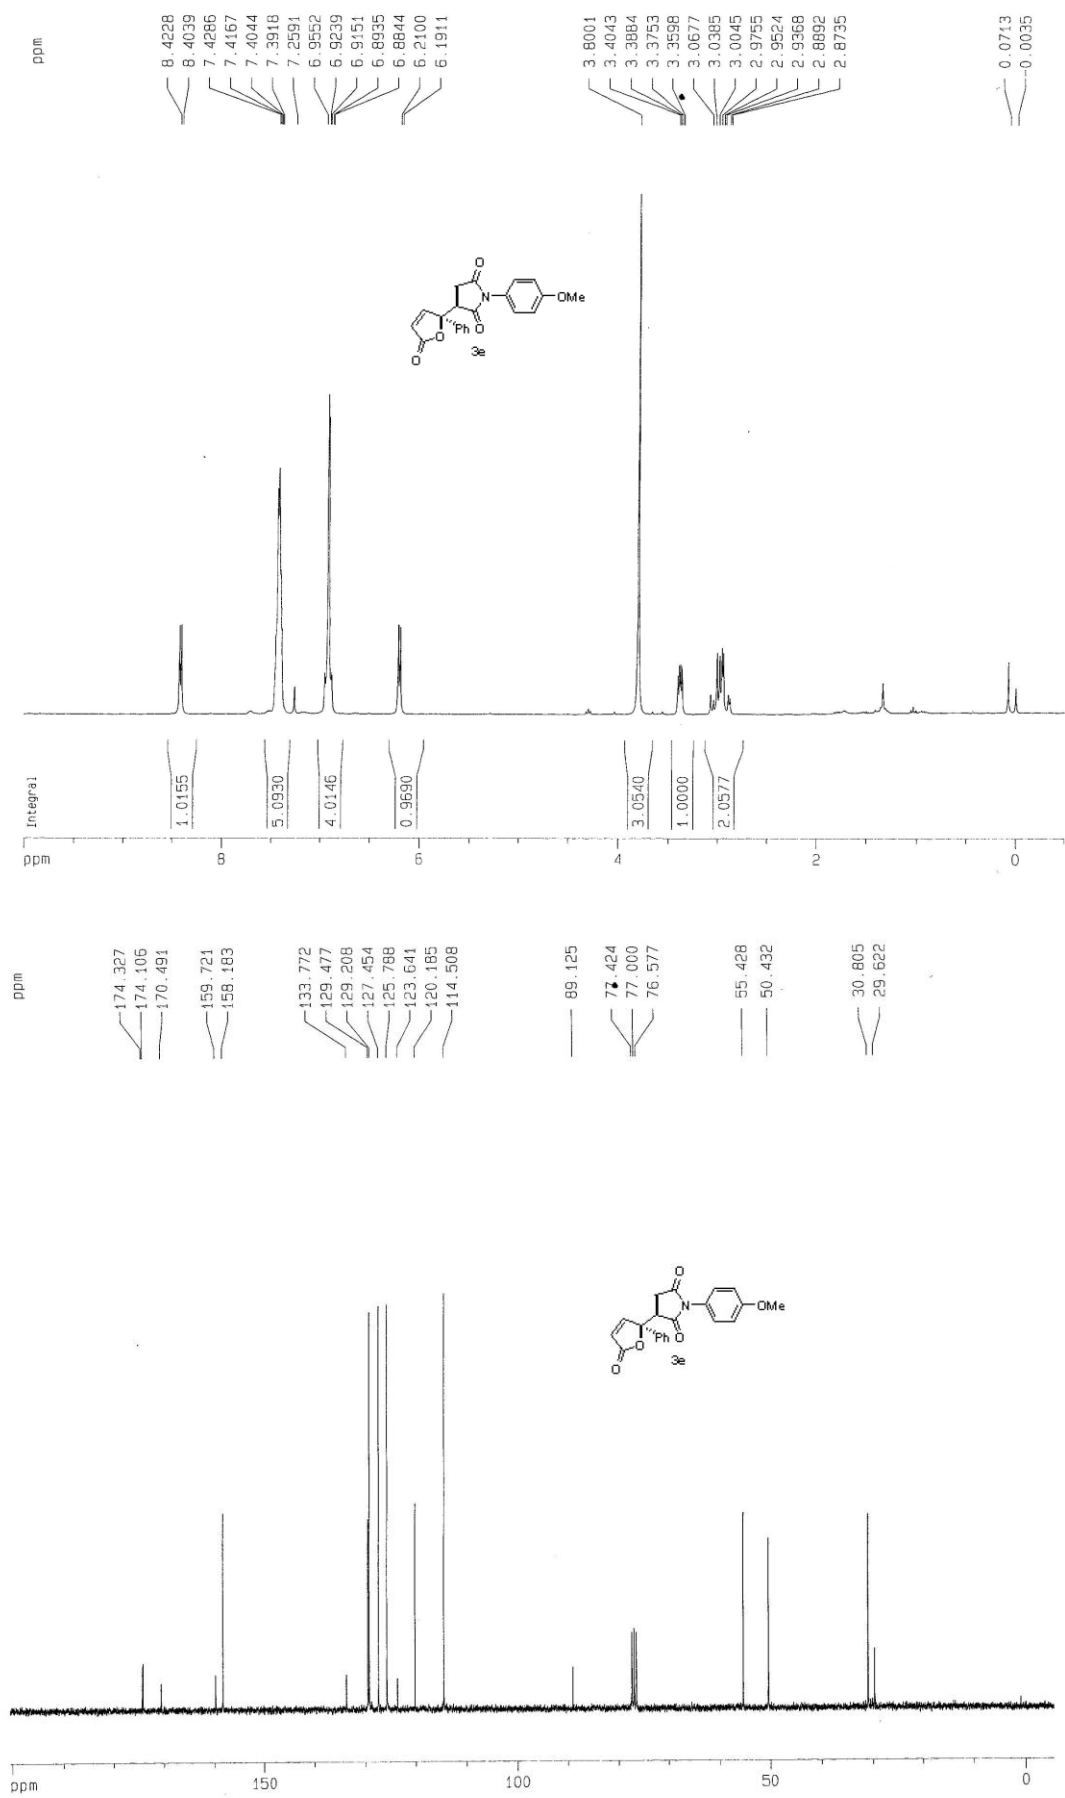



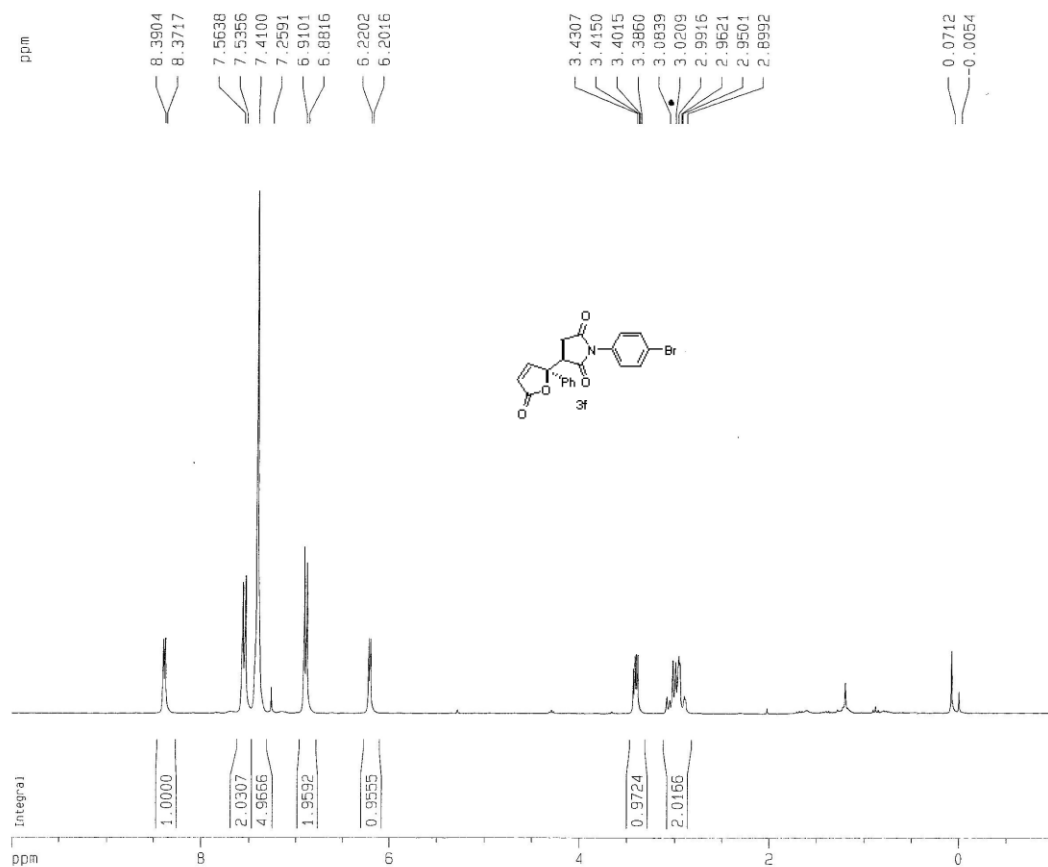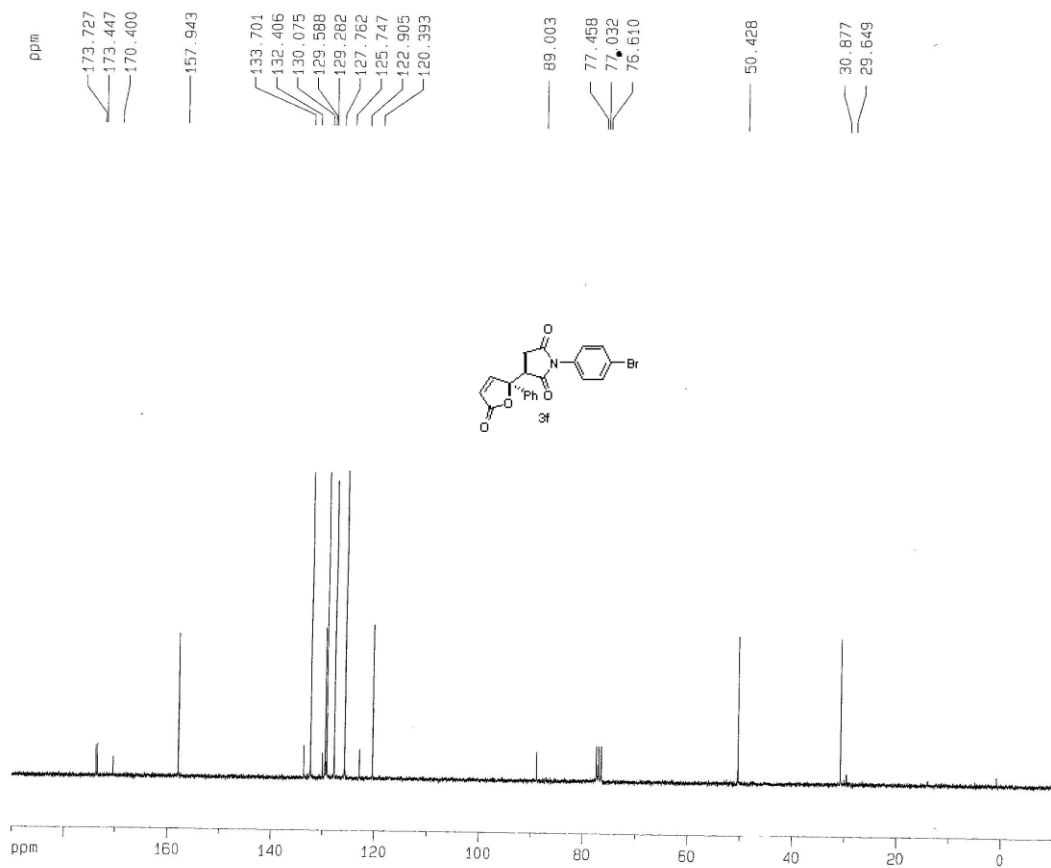

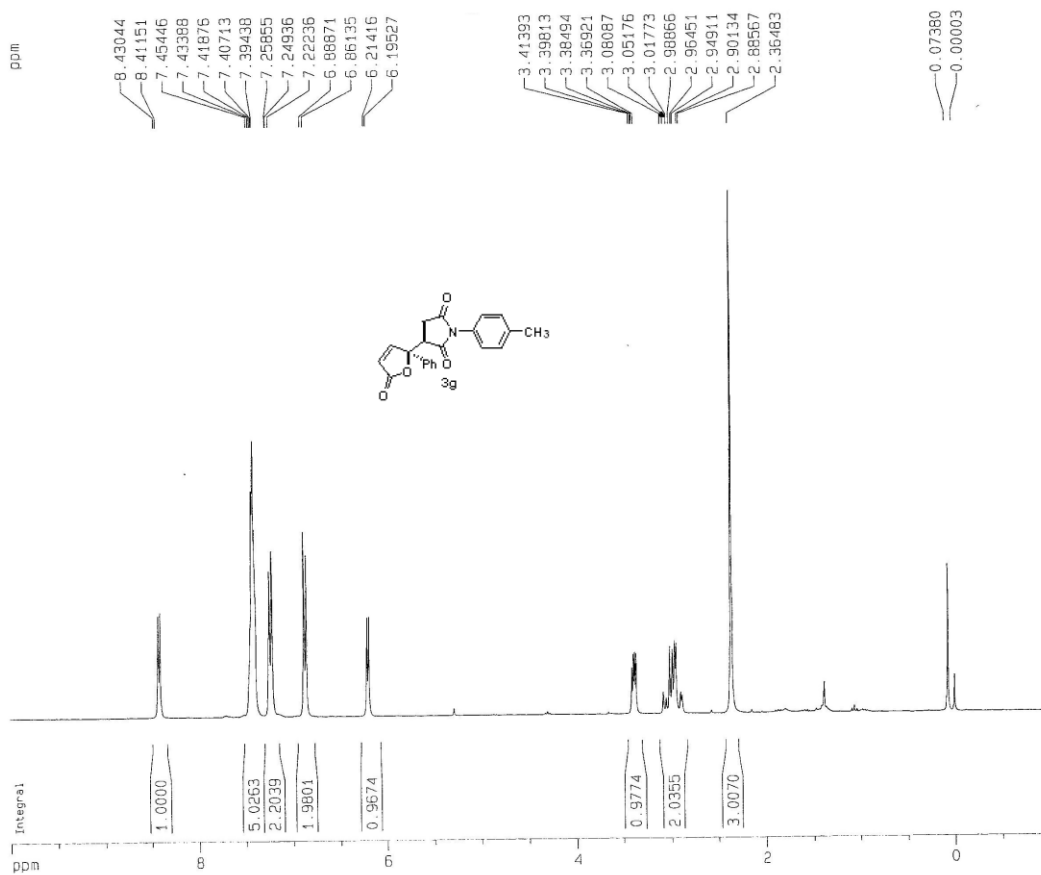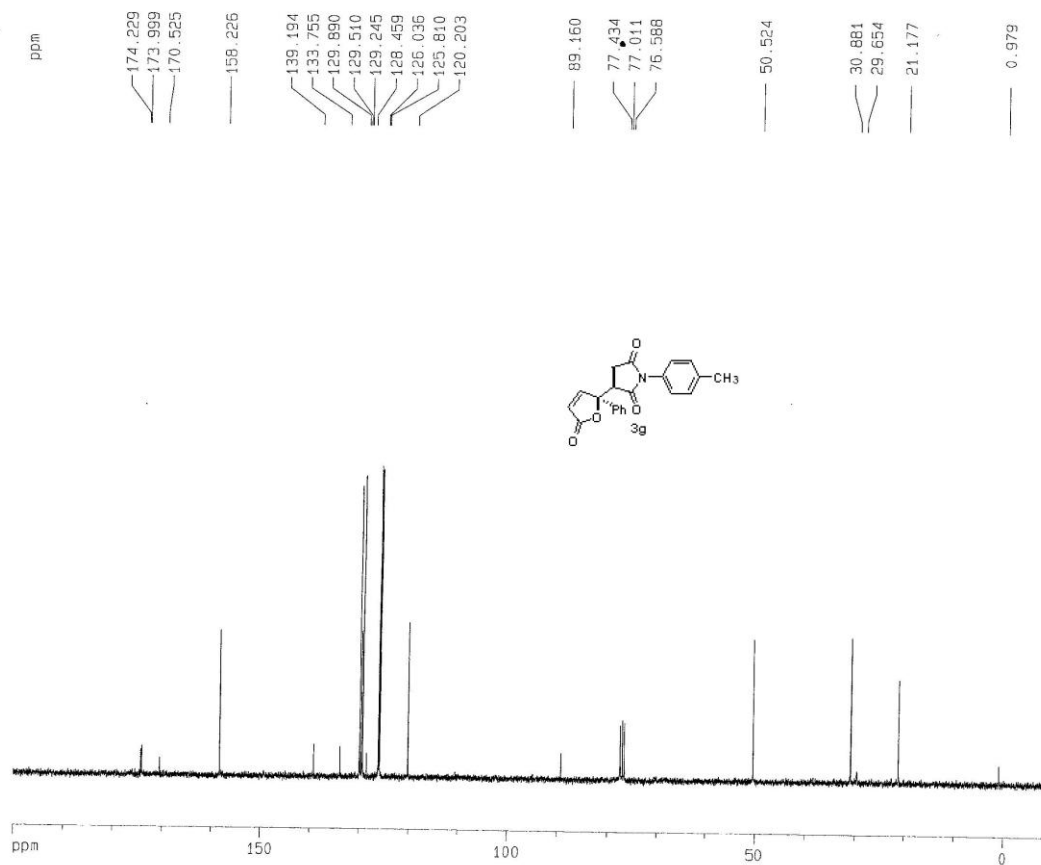

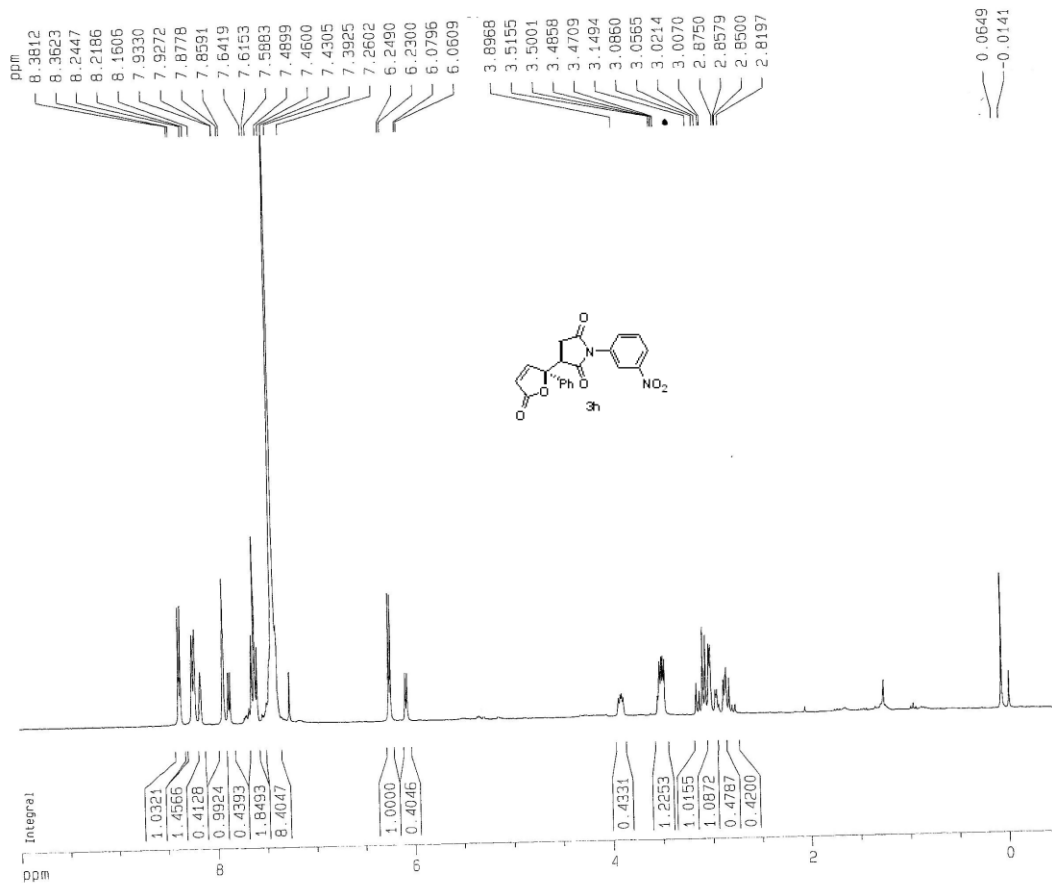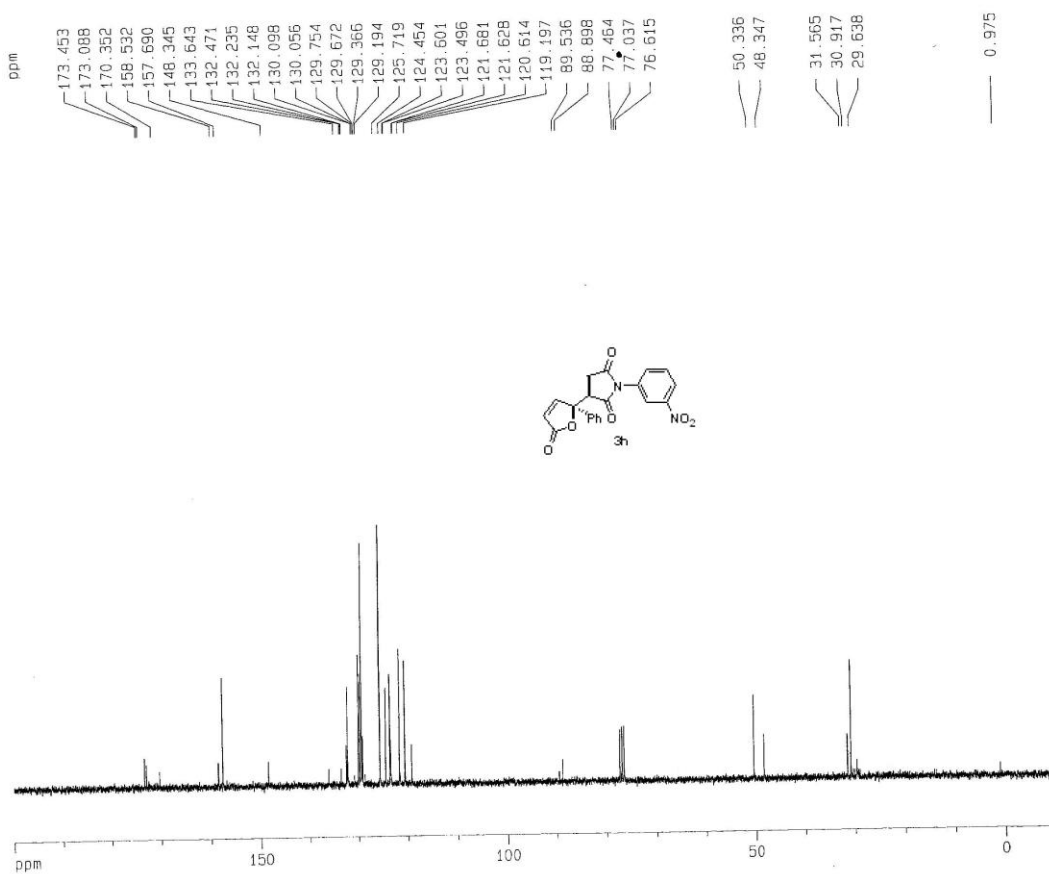

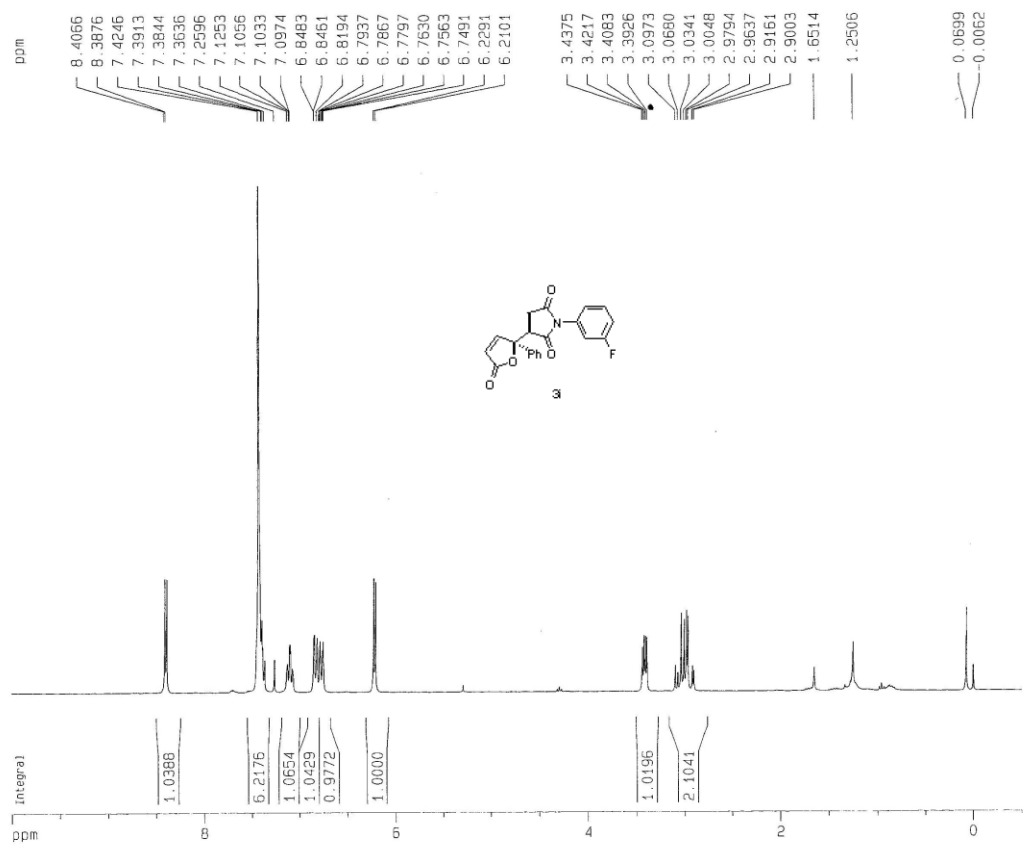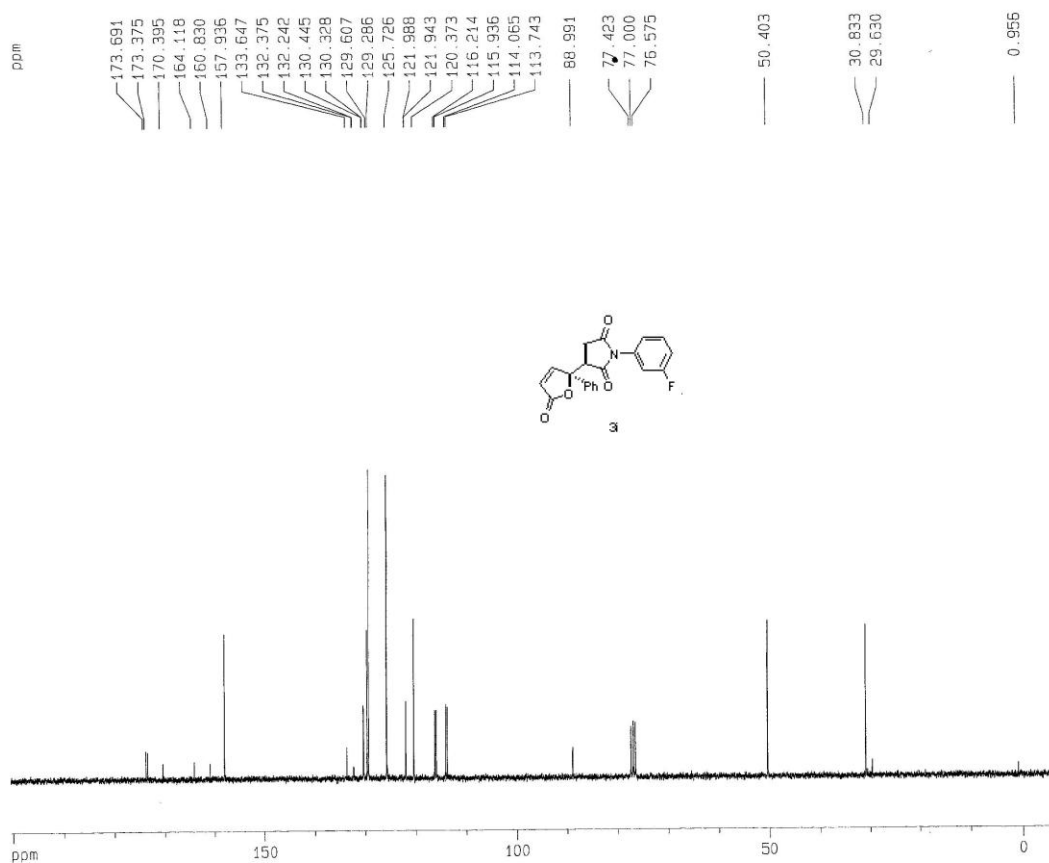

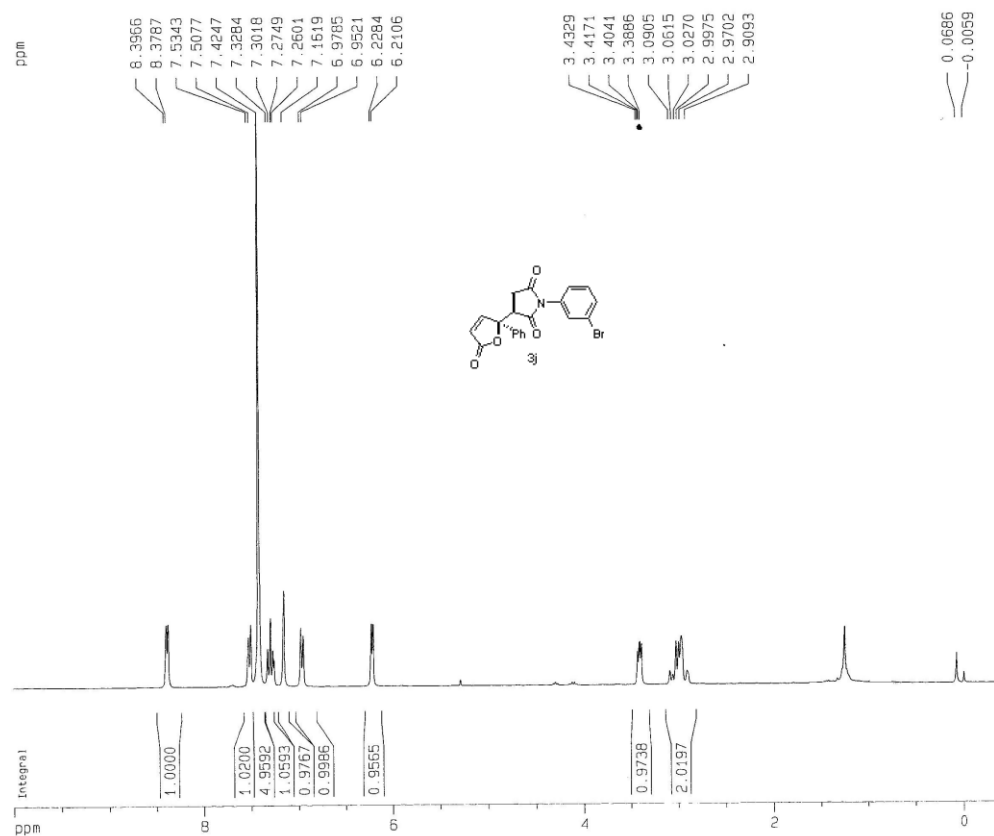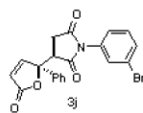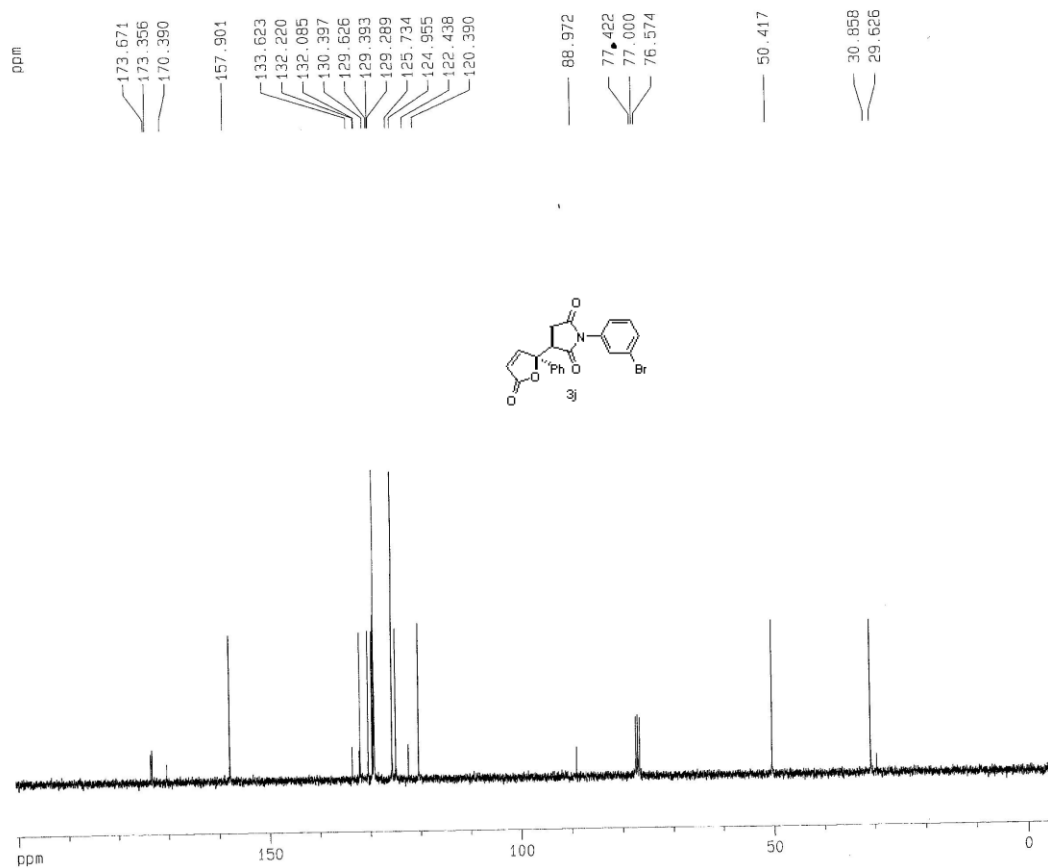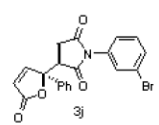

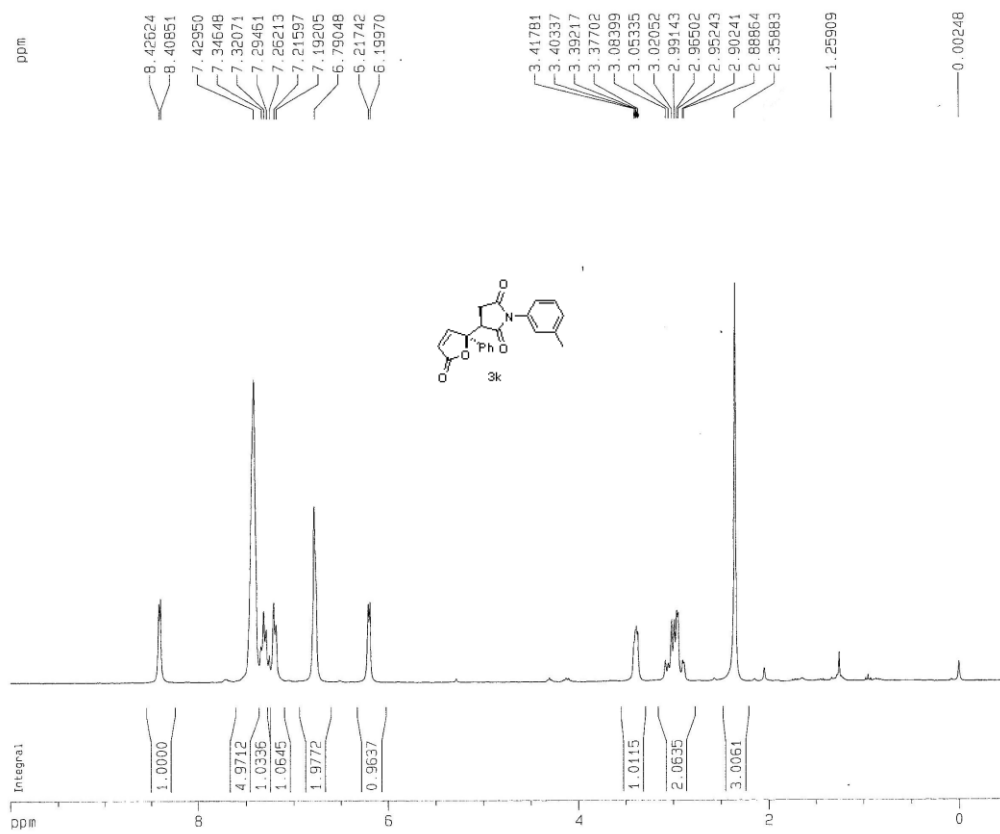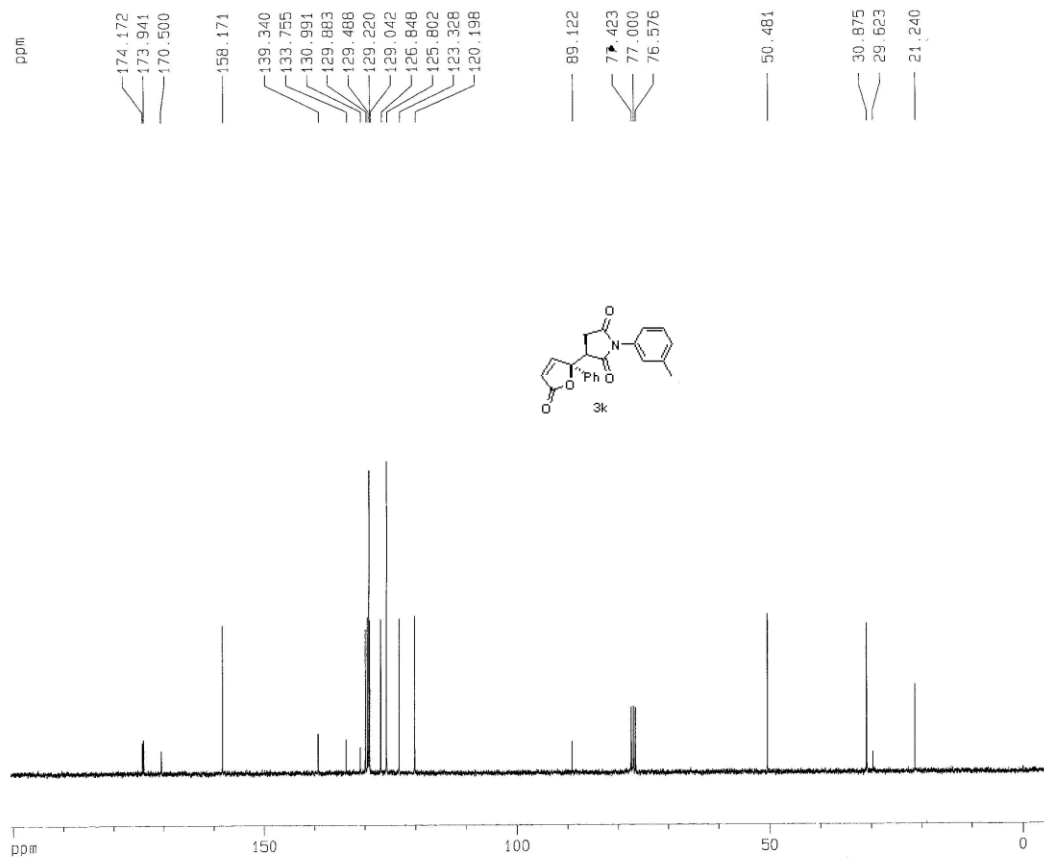

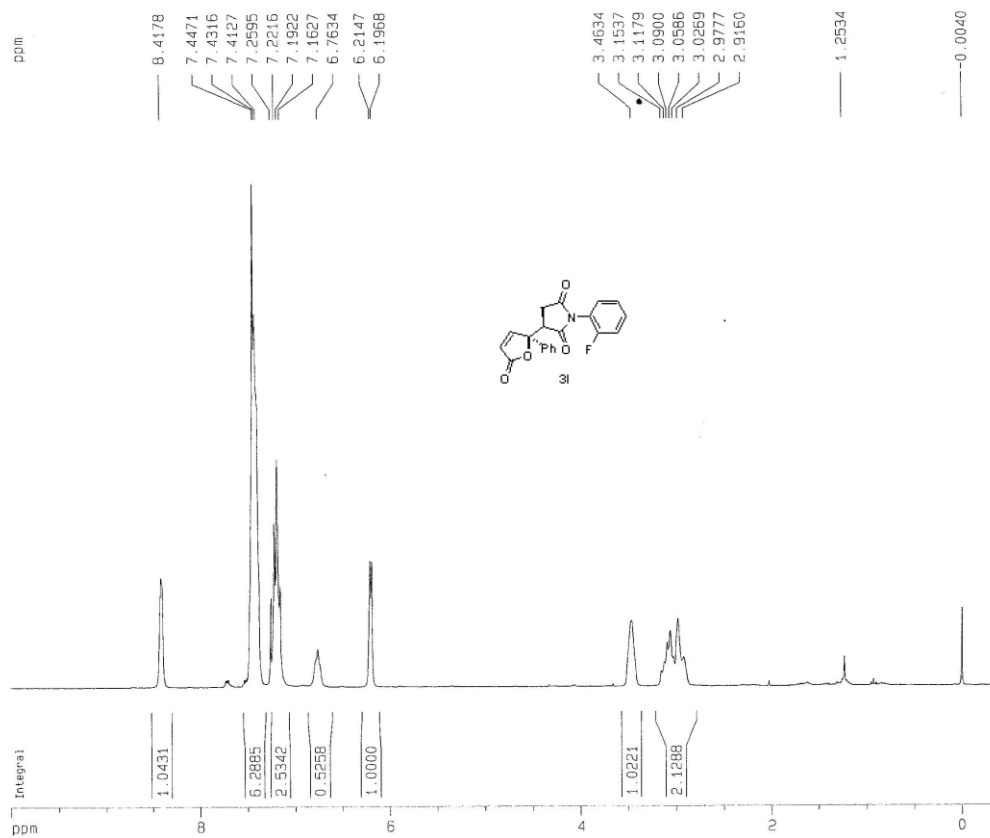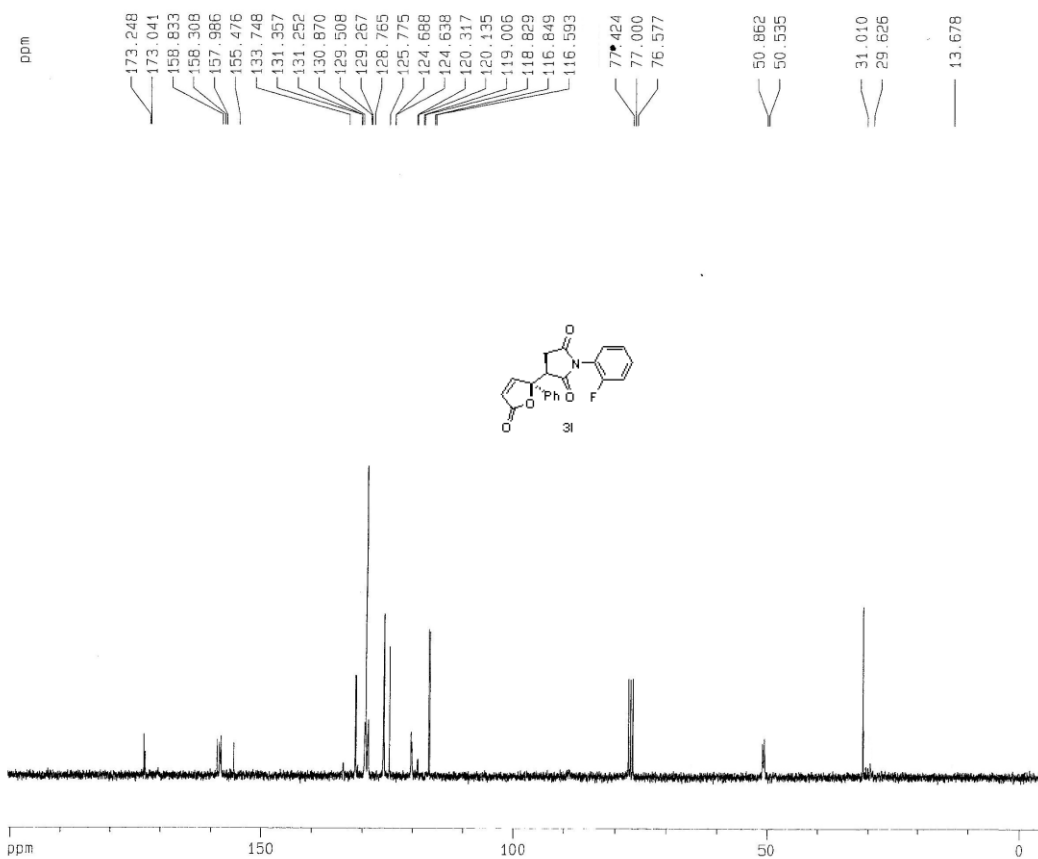

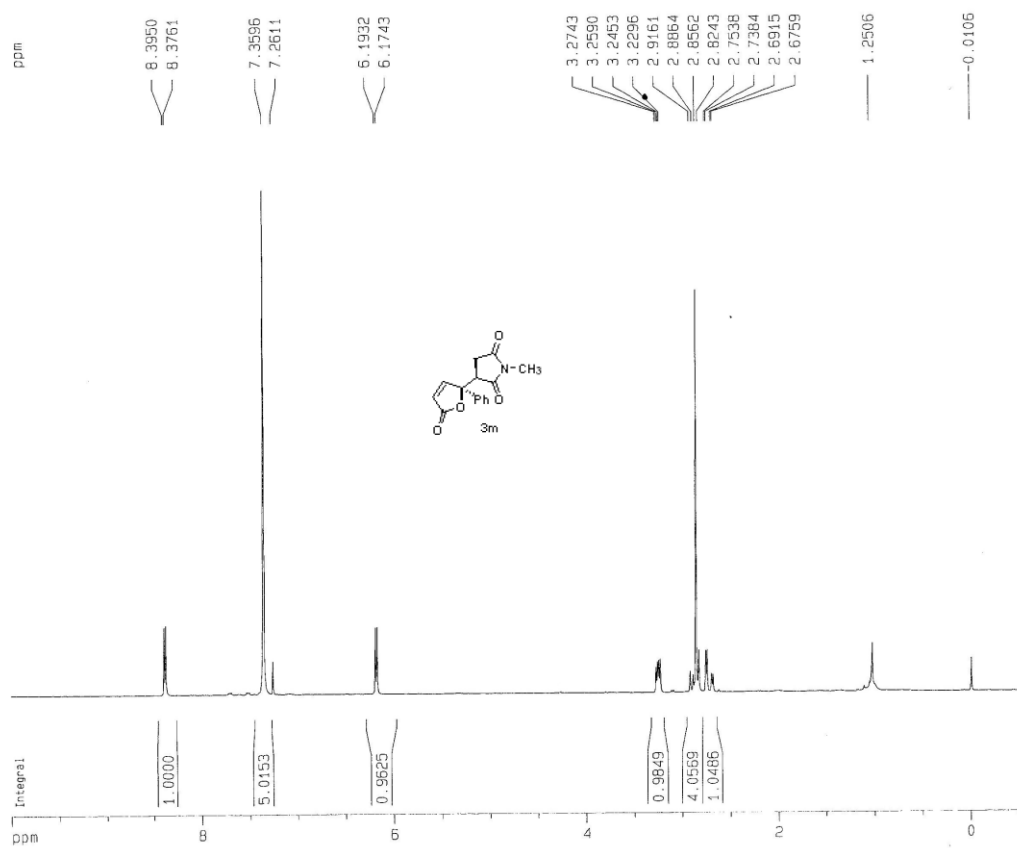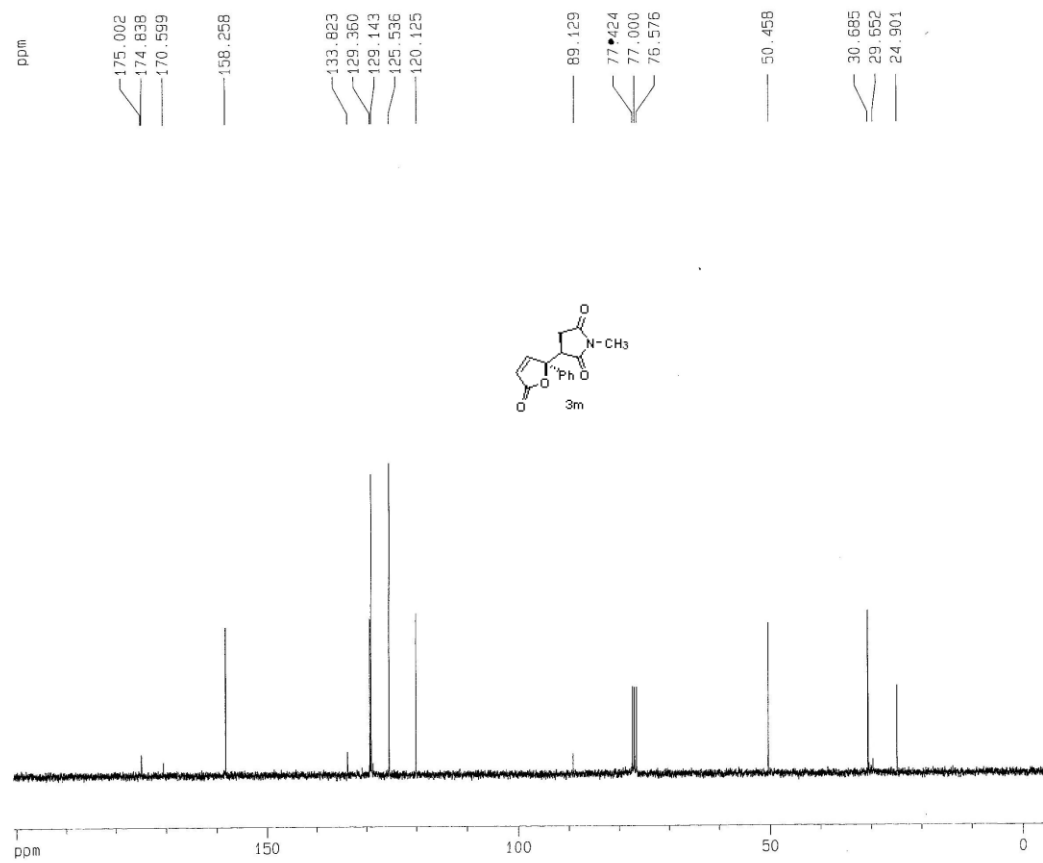



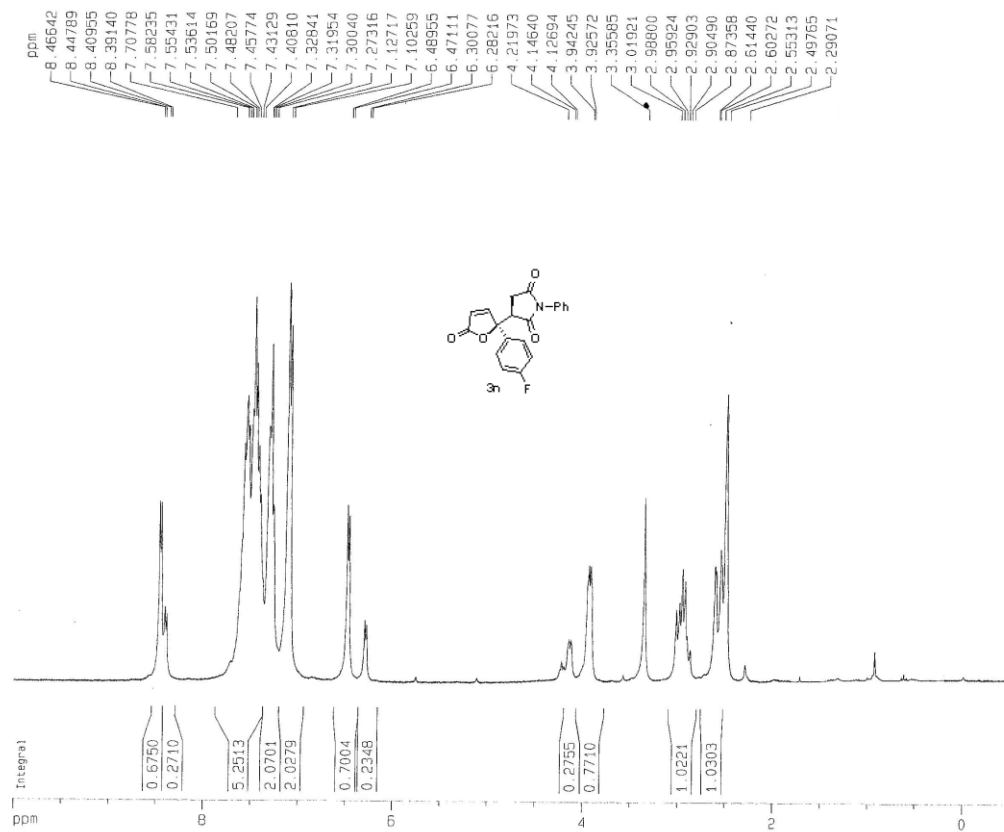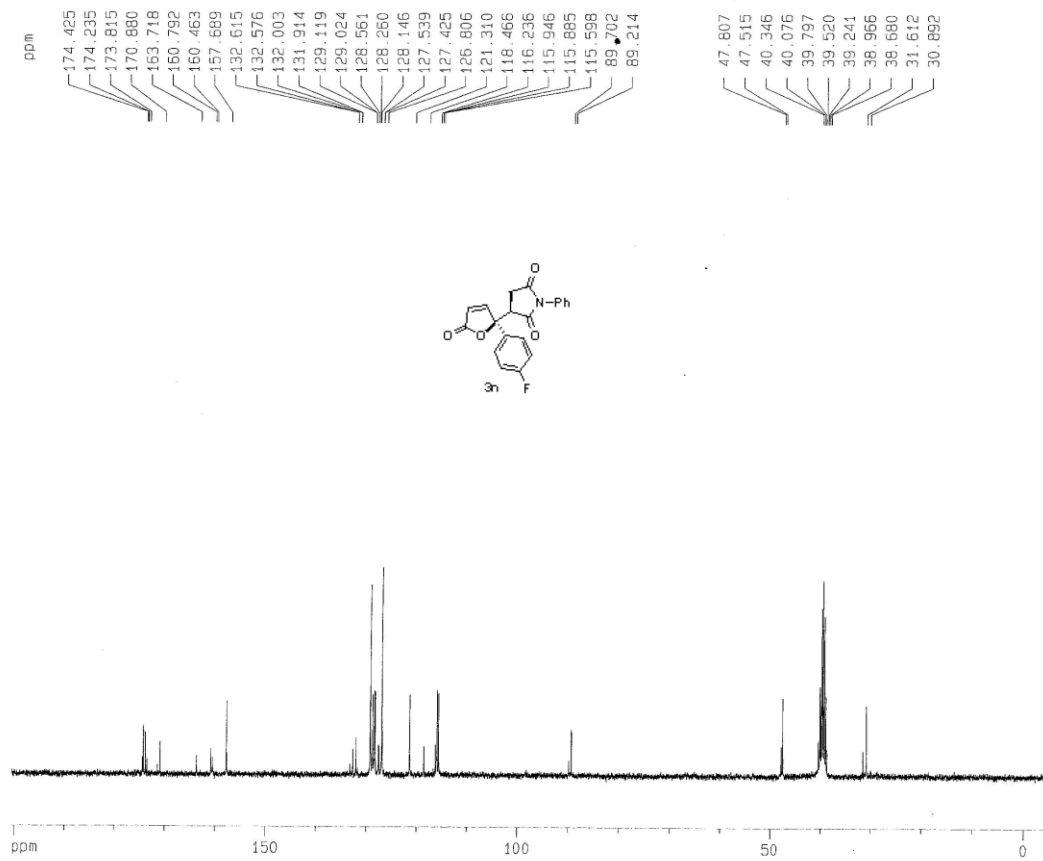

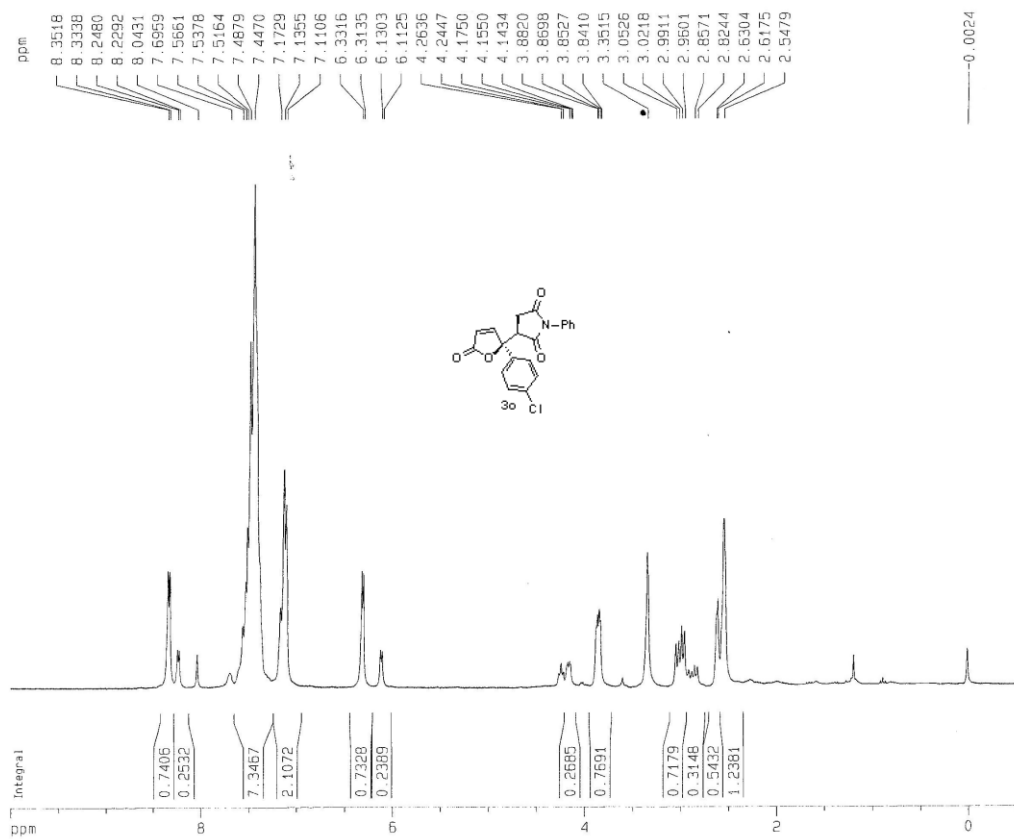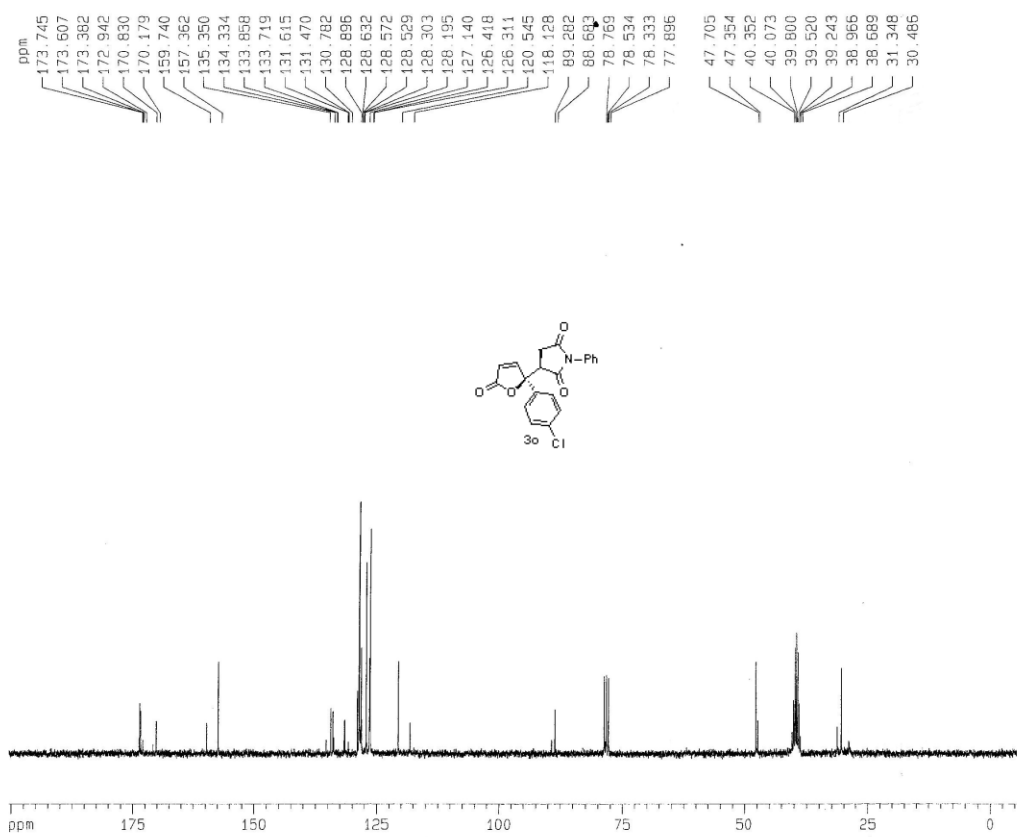

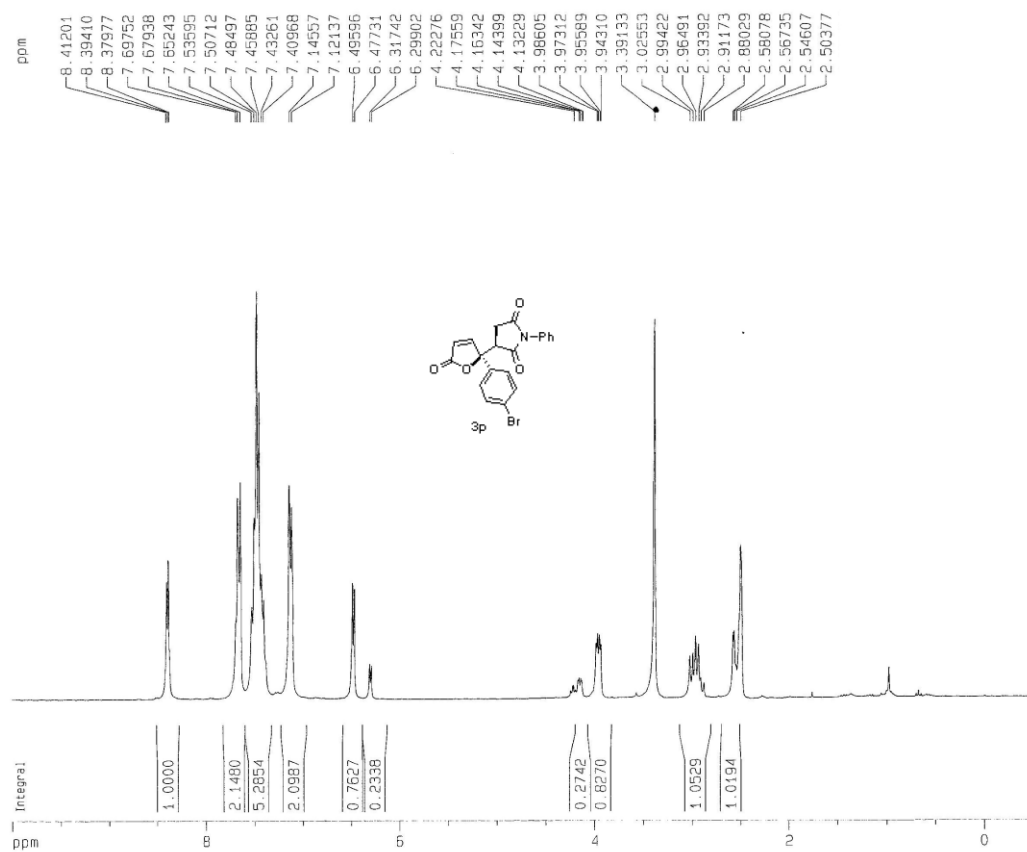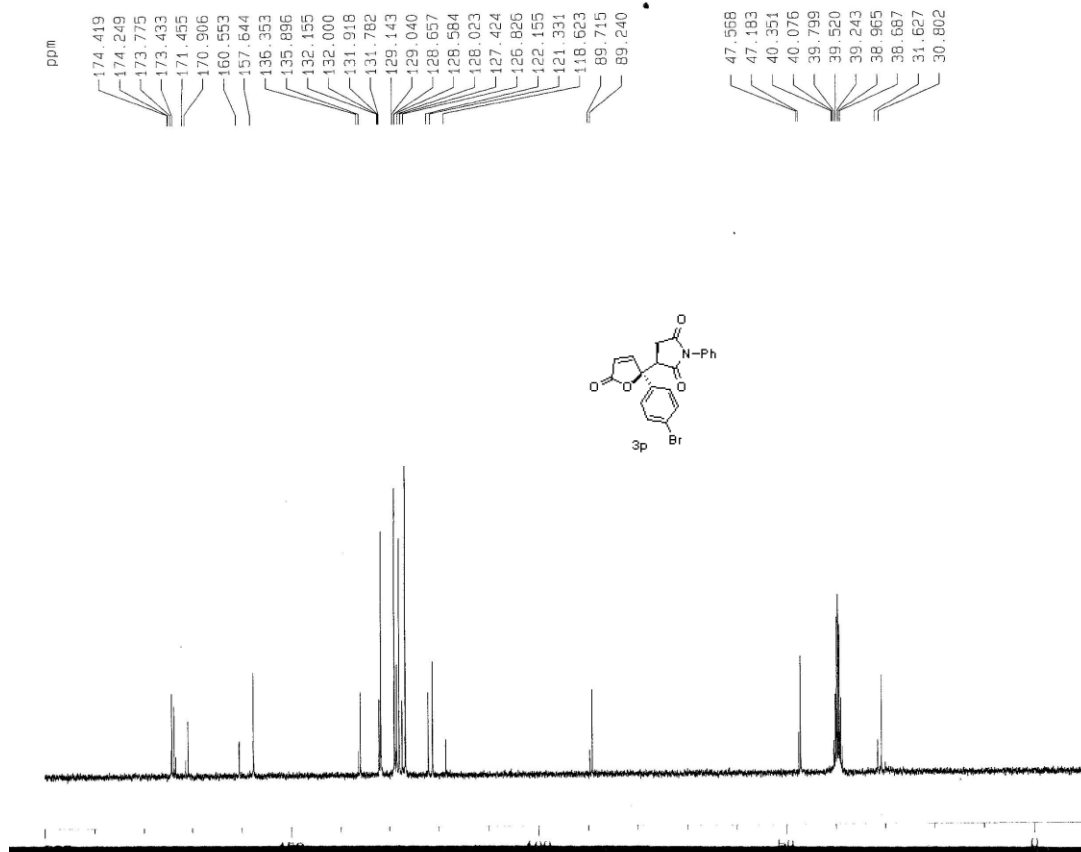

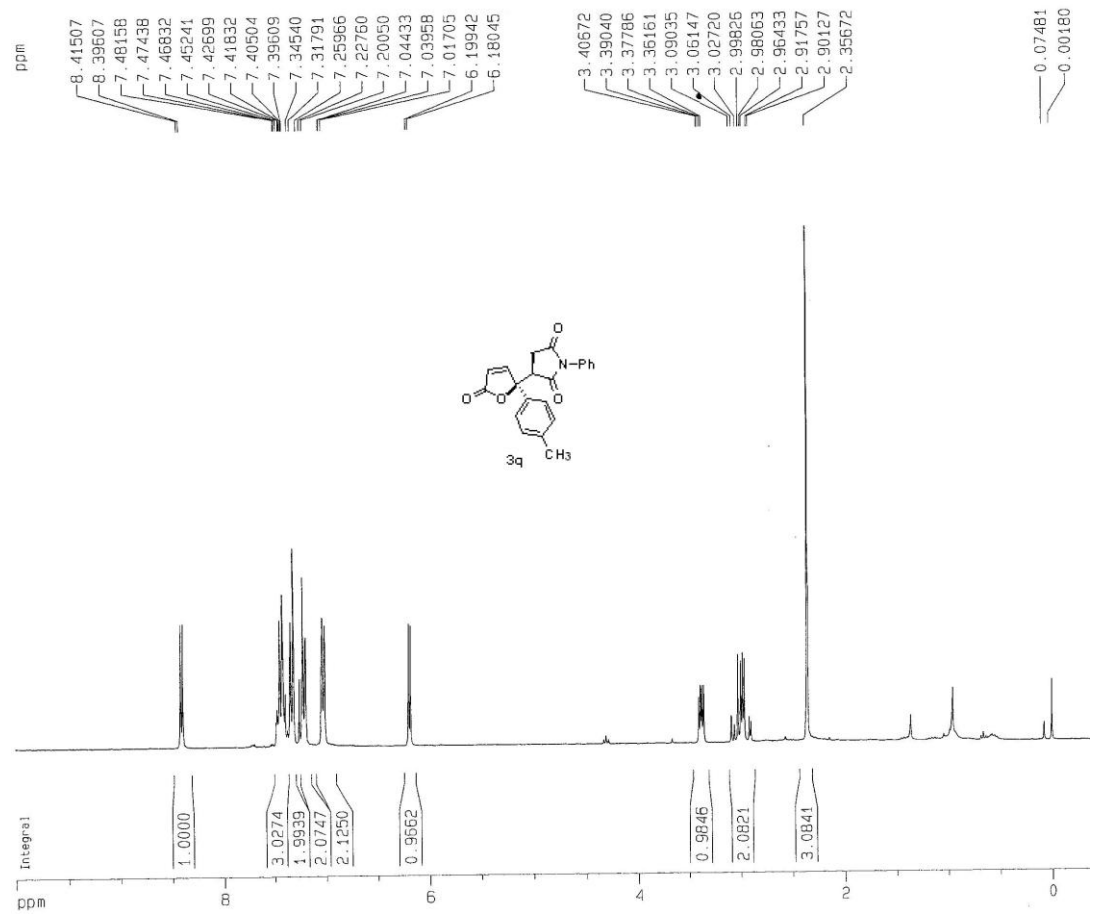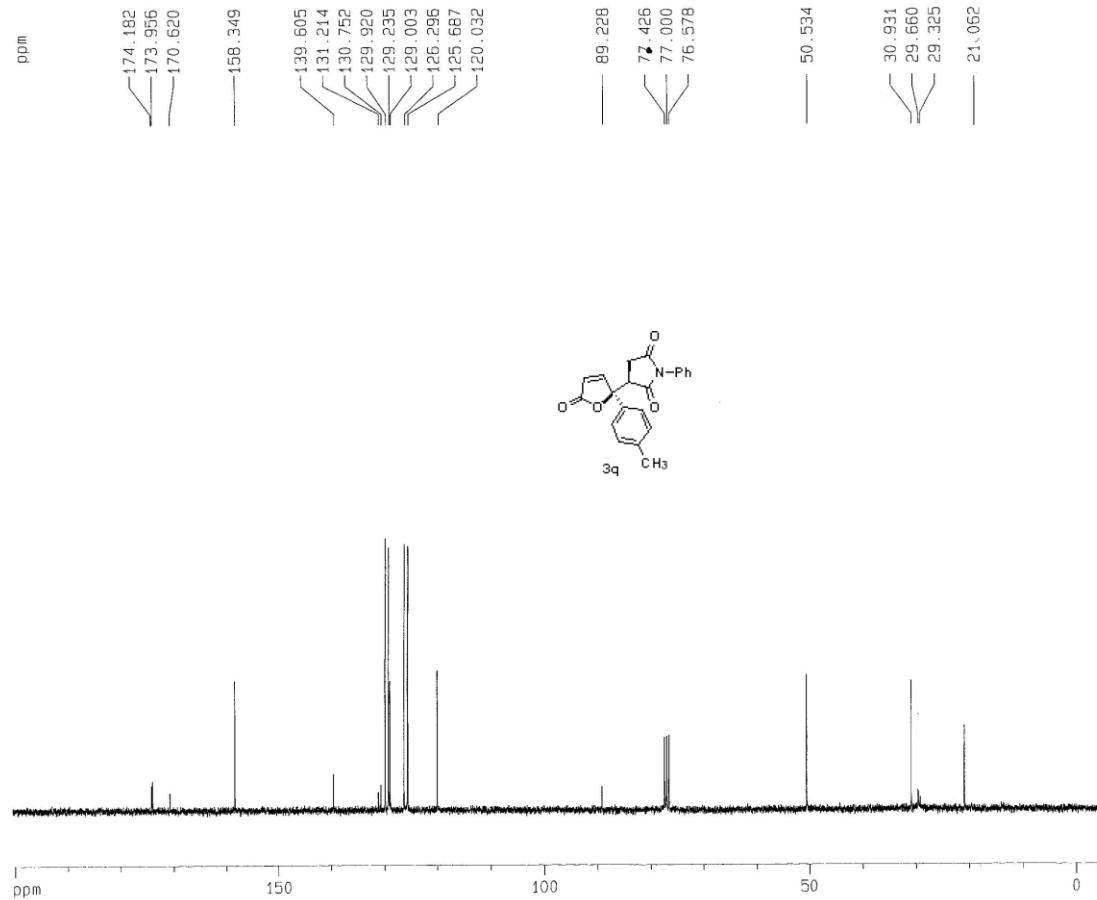

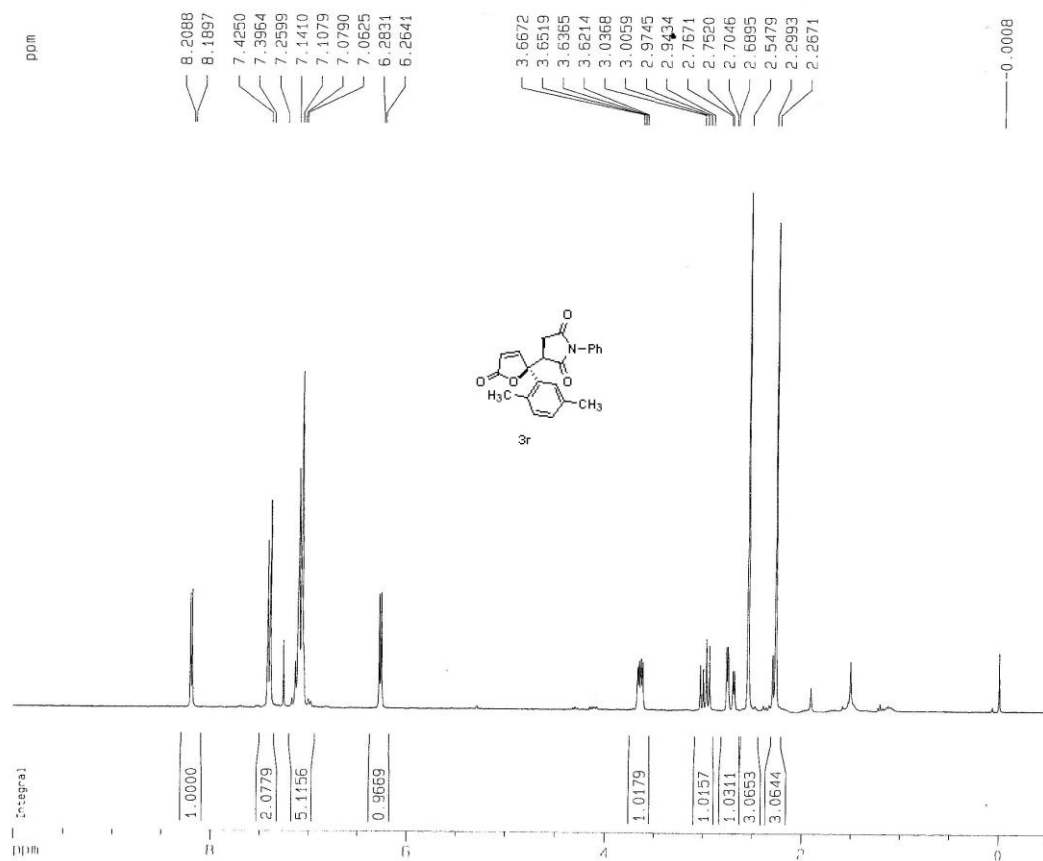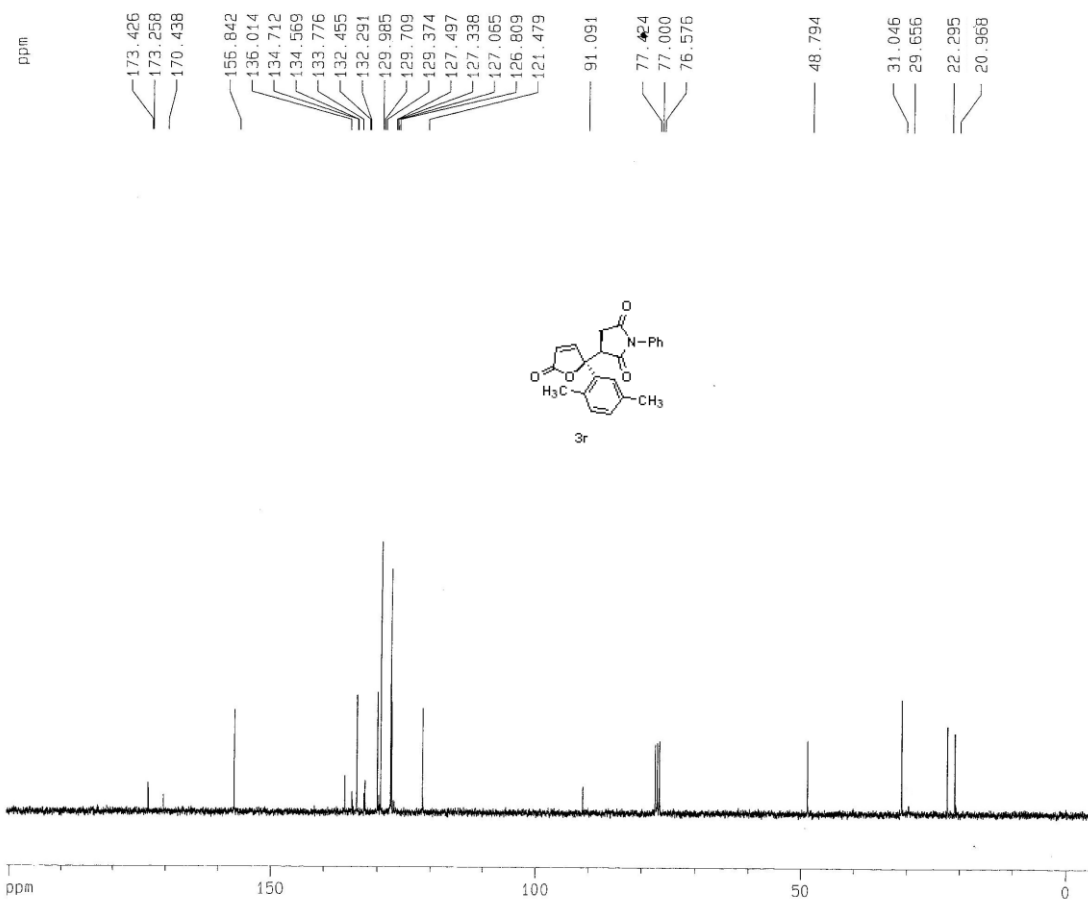

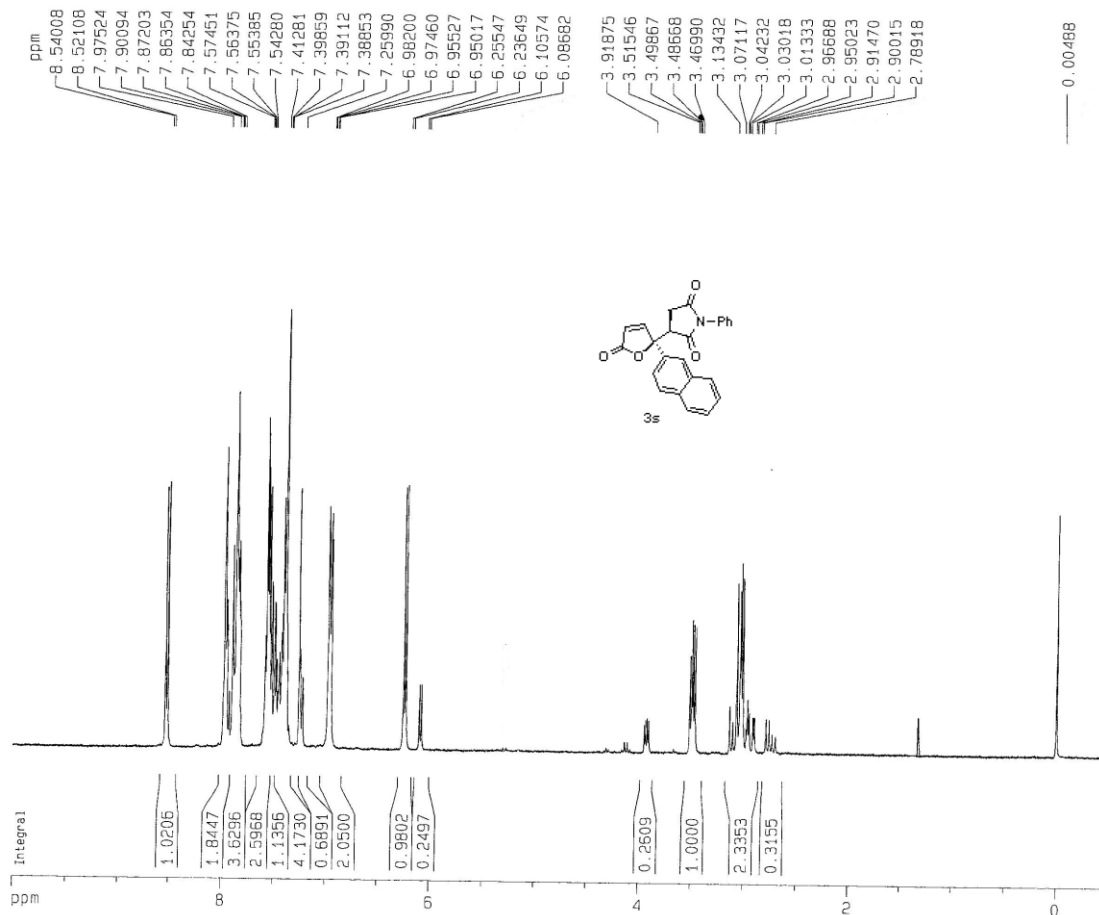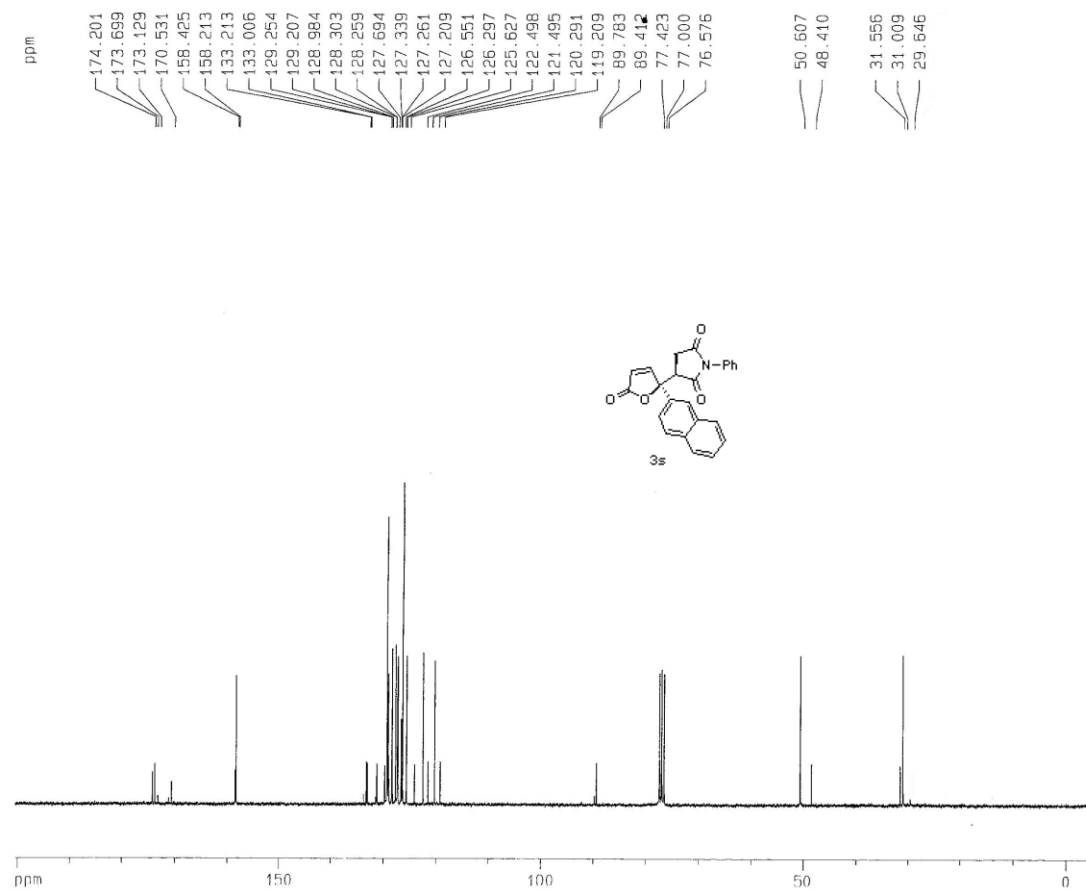

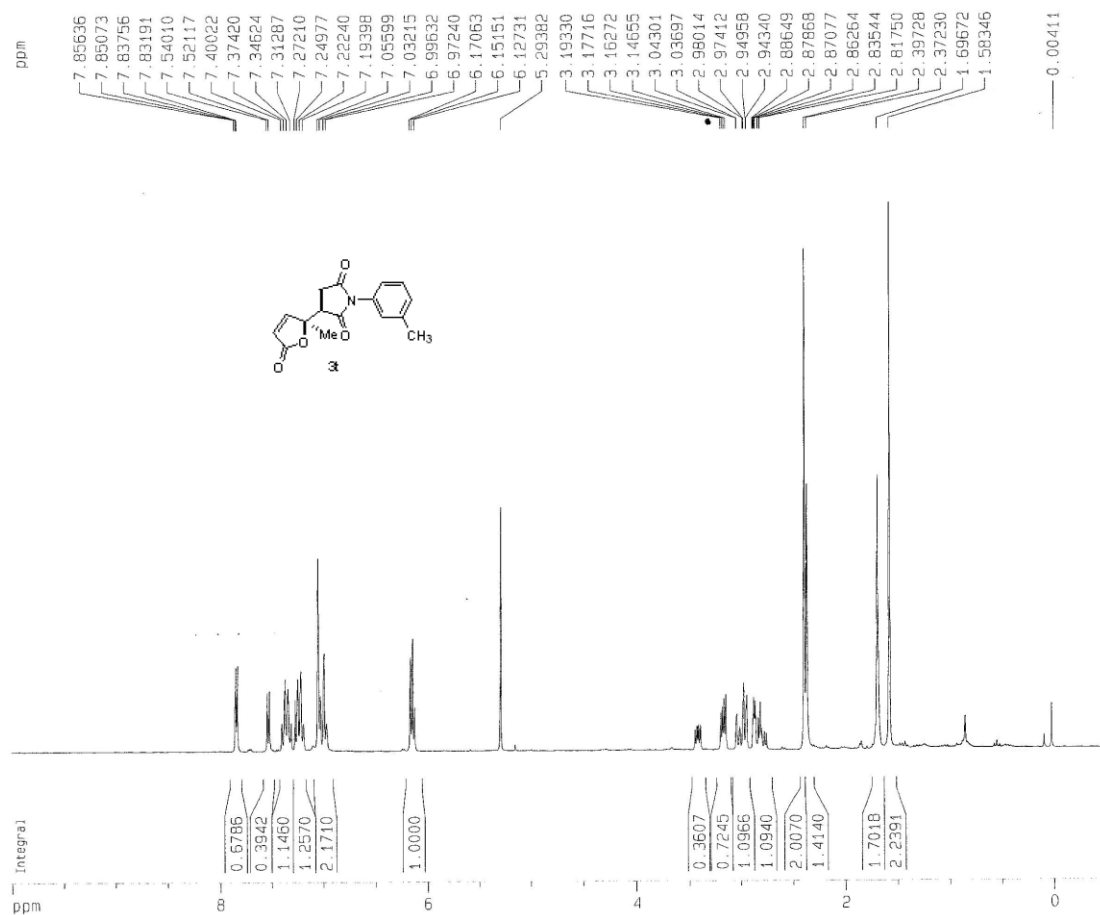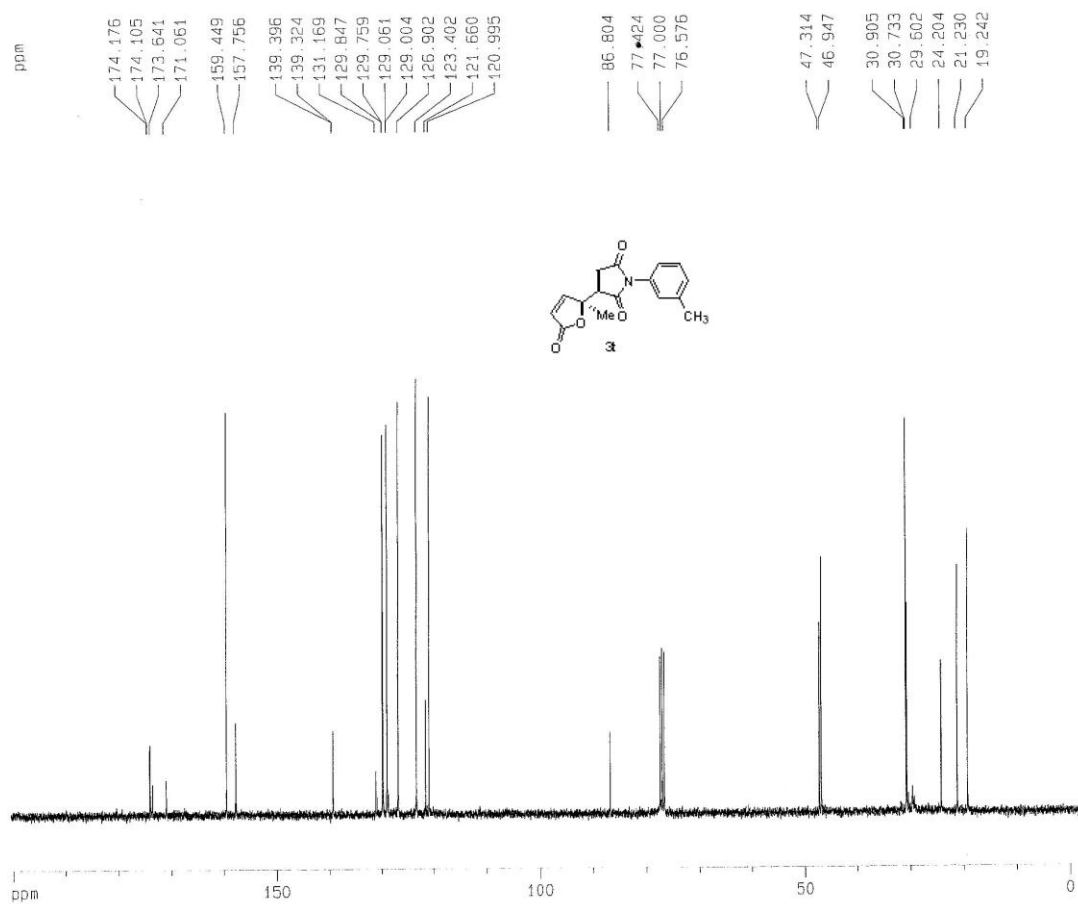

Supplement: c3ra43344g.pdf [file c3ra43344g.pdf]
